# Supplementary material for: Mechanism of photocatalyzed imine conversion: a relay process of sequential energy transfer, single electron transfer and proton transfer
Source: Royal Society of Chemistry journal article supplement (doi:10.1039/d3qo01020a), 2023-01-01
Supplement: d3qo01020a1.pdf [file d3qo01020a1.pdf]

Electronic Supplementary Material (ESI) for Organic Chemistry Frontiers. This journal is © the Partner Organisations 2023

## SUPPORTING INFORMATION FOR

### **The mechanism of photocatalyzed imine conversion: a relayed process of sequential energy transfer, single electron transfer and proton transfer**

Shuangshuang Ji <sup>a</sup>, Jianfeng Sheng <sup>a</sup>, Shang Gao <sup>a</sup>, Zhipeng Pei <sup>b</sup>, Fuming Ying <sup>c</sup>,

Jinshuai Song <sup>\*a, d</sup>, Yanyan Zhu <sup>\*a</sup>

<sup>a</sup> Green Catalysis Center and College of Chemistry, Zhengzhou University, Zhengzhou 450001, Henan, China.

<sup>b</sup> Institute for Nanoscale Science and Technology, College of Science and Engineering, Flinders University, Adelaide, South Australia 5042, Australia.

<sup>c</sup> State Key Laboratory of Physical Chemistry of Solid Surfaces, Fujian Provincial Key Laboratory of Theoretical and Computational Chemistry, Chemistry and Chemical Engineering College, Xiamen University, Xiamen 361005, China.

<sup>d</sup> Laboratory of Synthetic Biology, Zhengzhou University, Zhengzhou 450001, Henan, China.

E-mail: jssong@zzu.edu.cn; zhuyan@zzu.edu.cn

## **Contents**

|                                                                                   |          |
|-----------------------------------------------------------------------------------|----------|
| <b>Part 1: Marcus theory .....</b>                                                | <b>3</b> |
| <b>Part 2: Details of the PCET process .....</b>                                  | <b>5</b> |
| <b>Part 3: Redox potentials.....</b>                                              | <b>7</b> |
| <b>Part 4: Energies, cartesian coordinates, and vibrational frequencies .....</b> | <b>8</b> |

## Part 1: Marcus theory

The SET processes from an acceptor oxidant and electron donor were calculated using Marcus Theory at 25 °C. The Gibbs free energy of activation of the SET is calculated using Marcus Theory and is shown below as an example (1). The same steps are taken to calculate the SET barrier for other substrates.

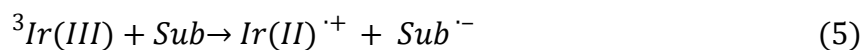

The activation Gibbs free energy is therefore given by

$$\Delta G^\ddagger = \frac{(\Delta G + \lambda)^2}{4\lambda} \quad (6)$$

Here,  $\lambda$  is the reaction of internal reorganization energy, which calculated as

$$\lambda = \lambda_1 + \lambda_2 \quad (7)$$

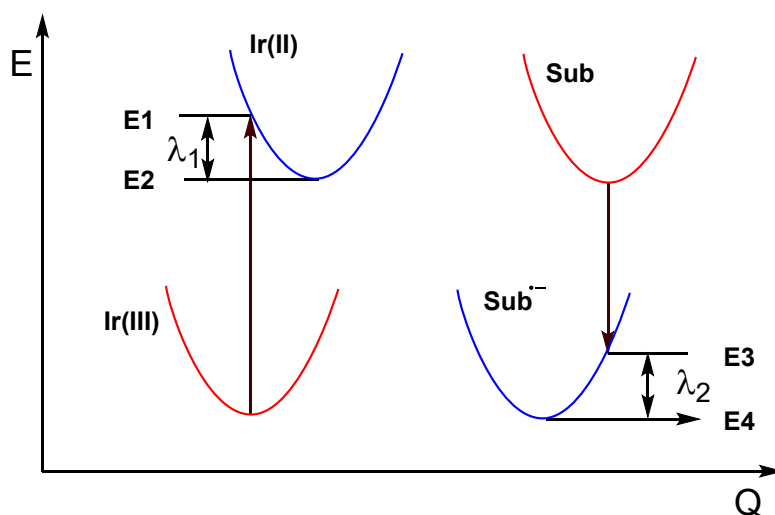

**Figure S1. Four-point model of internal reorganization energy**

Then,  $\lambda_1$  is the reorganization energy of photosensitizer **Ir(III)\***, and  $\lambda_2$  is the reorganization energy of substrate **M1**.

$$\lambda_1 = E1 - E2 \quad (8)$$

$$\lambda_2 = E3 - E4 \quad (9)$$

## Part 2: Details of the PCET process

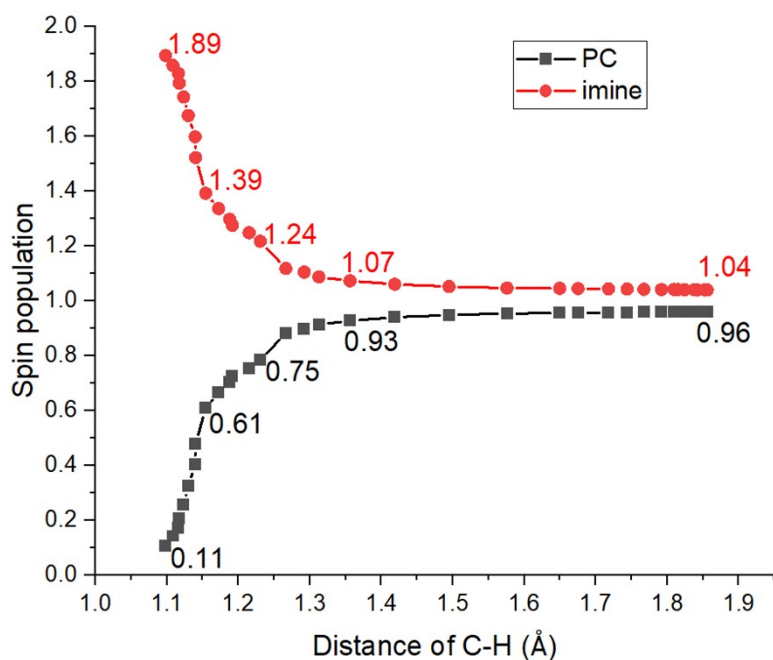

**Figure S2.** Fragment spin density as a function of C-H bond length (x-axis represents C-H bond length in Å, and y-axis represents the value of spin density).

We performed an IRC analysis on the key transition state TSp<sub>cet</sub>, as shown in Figure S2. We found that with an elongation of the C-H bond, the spin density on the photosensitizer gradually increases from 0.11 to 0.96, while the spin density on the iminium group gradually decreases from 1.89 to 1.04. This indicates that as the C-H bond breaks and the N-H bond forms, some electrons are transferred from the iminium group to the photosensitizer. These data suggest that TSp<sub>cet</sub> is a proton-coupled electron transfer process (PCET).

### Part 3: Redox potentials

From the principles of chemical thermodynamics, we can easily derive the calculation formula for the half-cell potential of a battery like eq. (1). In this paper, the Gibbs free energy change in eq. (2) is used to calculate the redox potentials. The calculation based on eq. (3) yields the absolute electrode potential, which cannot be directly measured experimentally. However, by using eq. (4), it can be converted to the relative electrode potential, which is the experimentally measurable electrode potential (4.429 V vs SCE).<sup>[1]</sup>

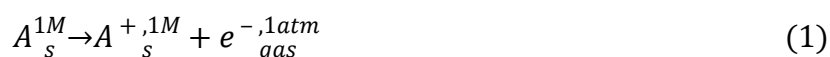

$$\Delta G_{OX}^\circ = G^\circ(A_s^{+,1M}) - G^\circ(A_s^{1M}) \quad (2)$$

$$E_{OX}^{\circ,abs} = \frac{\Delta G_{OX}^\circ}{nF} \quad (3)$$

$$E_{OX}^{\circ,SCE} = E_{OX}^{\circ,abs} - 4.429 \quad (4)$$

From our results in Table S1, the largest derivation of calculated redox potential is about 200 mV compared to experimental value, indicating our results are consistent to experiments. It could be found that, the redox potential of triplet state is quite different to ground state, indicating the nature of redox pair could be change.

**Table S1.** The redox potentials of substrate and photocatalyst at ground state and triplet state, in V vs SCE. Compound 35 and 36 are shown in Scheme S1.

| Redox pair                   | Redox potential |              |
|------------------------------|-----------------|--------------|
|                              | calculated      | experimental |
| $35 \rightarrow 35^{*+}$     | 1.707           | 1.861        |
| $36 \rightarrow 36^{*+}$     | 1.200           | 1.401        |
| ${}^335 \rightarrow 35^{*+}$ | -0.429          |              |
| ${}^336 \rightarrow 36^{*+}$ | -0.870          |              |
| $R1 \rightarrow R1^{*+}$     | 1.174           |              |
| ${}^3R1 \rightarrow R1^{*+}$ | -0.840          |              |
| $Ir^{*+} \rightarrow Ir$     | 1.429           |              |
| $Ir^{*+} \rightarrow {}^3Ir$ | -1.375          | -1.21        |

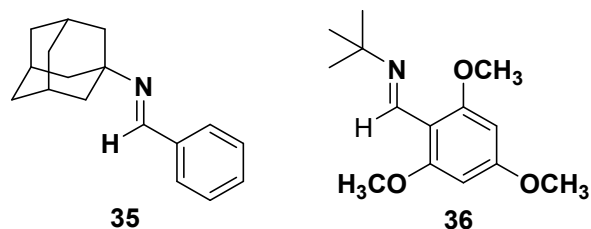

**Scheme S1.** The species of 35 and 36 in Ttable S1.

### Reference

1. Isse, A. A.; Gennaro, A., Absolute Potential of the Standard Hydrogen Electrode and the Problem of Interconversion of Potentials in Different Solvents. *J. Phys. Chem. B* **2010**, 114 (23), 7894-7899

## Part 4: Energies, cartesian coordinates, and vibrational frequencies

R1

|                                              |          |             |
|----------------------------------------------|----------|-------------|
| Zero-point correction=                       | 0.446317 |             |
| Thermal correction to Energy=                | 0.470334 |             |
| Thermal correction to Enthalpy=              | 0.471278 |             |
| Thermal correction to Gibbs Free Energy=     |          | 0.393739    |
| Sum of electronic and zero-point Energies=   |          | -981.515068 |
| Sum of electronic and thermal Energies=      |          | -981.491051 |
| Sum of electronic and thermal Enthalpies=    |          | -981.490107 |
| Sum of electronic and thermal Free Energies= |          | -981.567646 |

Cartesian coordinates

|   |           |           |           |
|---|-----------|-----------|-----------|
| C | 2.389957  | 0.483742  | -0.663610 |
| C | 2.875560  | 0.065777  | -2.054588 |
| H | 2.817167  | -1.025017 | -2.176932 |
| H | 2.231041  | 0.527254  | -2.818797 |
| H | 3.908294  | 0.392135  | -2.241408 |
| C | 2.523306  | 2.001620  | -0.523959 |
| H | 1.893992  | 2.519185  | -1.265225 |
| H | 2.231004  | 2.351968  | 0.477817  |
| H | 3.558218  | 2.319471  | -0.695742 |
| C | 4.634601  | -0.433486 | 0.621678  |
| N | 1.014672  | -0.018249 | -0.581796 |
| C | 0.053066  | 0.750430  | -0.256419 |
| H | 0.209392  | 1.819856  | -0.049056 |
| C | -1.351051 | 0.354036  | -0.122159 |
| C | -1.829118 | -0.977905 | -0.157189 |
| C | -2.313024 | 1.380898  | 0.079034  |
| C | -3.192078 | -1.269447 | 0.002173  |
| C | -3.667353 | 1.101700  | 0.235375  |
| C | -4.100812 | -0.227909 | 0.195661  |
| H | -3.534648 | -2.299790 | -0.025436 |
| H | -4.411124 | 1.881410  | 0.385434  |
| O | -1.834842 | 2.639349  | 0.104069  |
| O | -0.924407 | -1.947441 | -0.336206 |
| O | -5.422244 | -0.414628 | 0.353813  |
| C | -1.331773 | -3.290906 | -0.343545 |
| H | -0.422998 | -3.886985 | -0.491900 |
| H | -1.799302 | -3.583004 | 0.612008  |
| H | -2.035246 | -3.502144 | -1.166541 |
| C | -2.716822 | 3.711544  | 0.321085  |

|   |           |           |           |
|---|-----------|-----------|-----------|
| H | -3.225509 | 3.628716  | 1.295970  |
| H | -2.106222 | 4.622561  | 0.311963  |
| H | -3.476199 | 3.780109  | -0.475515 |
| C | -5.938024 | -1.722785 | 0.333351  |
| H | -5.514873 | -2.339171 | 1.144141  |
| H | -7.021029 | -1.633819 | 0.481495  |
| H | -5.748222 | -2.220121 | -0.632594 |
| C | 3.101855  | -0.266601 | 0.493206  |
| H | 2.668326  | -1.280377 | 0.499741  |
| H | 2.737084  | 0.211352  | 1.419580  |
| C | 4.877035  | -0.966112 | 2.040923  |
| H | 5.946774  | -1.172229 | 2.205107  |
| H | 4.550980  | -0.237611 | 2.800349  |
| H | 4.322144  | -1.902435 | 2.212820  |
| C | 5.183535  | -1.474177 | -0.361387 |
| H | 4.633543  | -2.424909 | -0.275161 |
| H | 5.120993  | -1.142962 | -1.405994 |
| H | 6.244205  | -1.679227 | -0.143651 |
| C | 5.415377  | 0.873014  | 0.465356  |
| H | 5.377391  | 1.258642  | -0.564302 |
| H | 5.031699  | 1.655766  | 1.138337  |
| H | 6.476947  | 0.710288  | 0.712733  |

#### Vibrational frequencies

|          |          |          |
|----------|----------|----------|
| -12.6596 | 24.3791  | 29.8198  |
| 37.3360  | 71.8542  | 77.3305  |
| 95.4061  | 112.7709 | 120.9365 |
| 160.7111 | 176.1811 | 181.4546 |
| 186.5643 | 204.3127 | 210.2048 |
| 224.1284 | 237.4194 | 249.4221 |
| 257.9835 | 271.3934 | 276.6655 |
| 280.8818 | 288.9618 | 291.2384 |
| 311.4378 | 318.9407 | 321.7856 |
| 334.9051 | 348.9653 | 369.3471 |

#### PC

|                                            |          |              |
|--------------------------------------------|----------|--------------|
| Zero-point correction=                     | 0.710086 |              |
| Thermal correction to Energy=              | 0.768513 |              |
| Thermal correction to Enthalpy=            | 0.769457 |              |
| Thermal correction to Gibbs Free Energy=   |          | 0.611097     |
| Sum of electronic and zero-point Energies= |          | -3876.605238 |
| Sum of electronic and thermal Energies=    |          | -3876.546811 |
| Sum of electronic and thermal Enthalpies=  |          | -3876.545867 |



Sum of electronic and thermal Free Energies=

-3876.704228

Cartesian coordinates

|    |           |           |           |
|----|-----------|-----------|-----------|
| Ir | 1.344447  | -0.377678 | -0.059043 |
| C  | -1.304130 | -3.792665 | -2.177827 |
| C  | -1.693861 | -3.309650 | -0.928511 |
| C  | -0.942561 | -2.303658 | -0.344343 |
| C  | 0.581542  | -2.287736 | -2.126553 |
| C  | -0.168550 | -3.276152 | -2.778889 |
| H  | -1.882152 | -4.572793 | -2.676952 |
| H  | -1.228457 | -1.876929 | 0.615313  |
| H  | 0.156112  | -3.644408 | -3.748011 |
| C  | 3.653556  | -0.178071 | -2.045332 |
| C  | 2.435183  | -0.766144 | -1.692835 |
| C  | 1.834592  | -1.700076 | -2.583427 |
| C  | 2.480450  | -1.990598 | -3.794472 |
| C  | 3.683328  | -1.406131 | -4.152864 |
| C  | 4.248649  | -0.504615 | -3.256996 |
| H  | 4.159106  | 0.539075  | -1.396485 |
| H  | 4.162860  | -1.648987 | -5.100689 |
| N  | 0.157756  | -1.811809 | -0.921439 |
| F  | 1.941982  | -2.854501 | -4.657575 |
| F  | 5.406556  | 0.064157  | -3.583457 |
| C  | -2.849651 | -3.922126 | -0.190472 |
| F  | -3.279206 | -3.148296 | 0.801926  |
| F  | -2.486453 | -5.095377 | 0.354781  |
| F  | -3.872317 | -4.178873 | -1.003639 |
| C  | -2.175253 | 0.612604  | 3.258379  |
| C  | -1.118060 | -0.242751 | 3.602514  |
| C  | -0.091514 | -0.471286 | 2.702906  |
| C  | -1.030439 | 0.973991  | 1.153849  |
| C  | -2.095542 | 1.235688  | 2.013329  |
| H  | -1.095062 | -0.760912 | 4.562006  |
| H  | 0.726369  | -1.157484 | 2.933633  |
| C  | -1.697545 | 3.019162  | -1.972936 |
| C  | -1.808547 | 2.531130  | -0.671754 |
| C  | -0.919070 | 1.573015  | -0.191216 |
| C  | 0.230158  | 1.585915  | -2.202436 |
| C  | -0.634821 | 2.522097  | -2.741020 |
| H  | -2.618803 | 2.865919  | -0.032084 |
| H  | 1.066175  | 1.184291  | -2.778867 |
| H  | -0.473099 | 2.849807  | -3.768536 |
| N  | -0.056626 | 0.106500  | 1.495756  |

|   |           |           |           |
|---|-----------|-----------|-----------|
| N | 0.092332  | 1.117828  | -0.955840 |
| C | 4.359874  | -1.889276 | 2.488937  |
| C | 4.187598  | -3.259708 | 2.572196  |
| C | 3.144221  | -3.818761 | 1.840210  |
| C | 2.291624  | -3.061102 | 1.048546  |
| C | 2.468179  | -1.676223 | 0.970006  |
| C | 3.528048  | -1.073388 | 1.706440  |
| H | 4.846557  | -3.870880 | 3.188303  |
| H | 1.497972  | -3.574623 | 0.503443  |
| C | 4.581956  | 2.563904  | 1.943921  |
| C | 4.603487  | 1.199765  | 2.171264  |
| C | 3.639668  | 0.371709  | 1.573939  |
| C | 2.662741  | 2.244383  | 0.553252  |
| C | 3.590495  | 3.101563  | 1.118927  |
| H | 5.334378  | 3.207429  | 2.404431  |
| H | 5.366212  | 0.760620  | 2.808277  |
| H | 1.875308  | 2.617107  | -0.101057 |
| F | 2.964995  | -5.134980 | 1.908265  |
| F | 5.360007  | -1.355876 | 3.193811  |
| N | 2.687465  | 0.925285  | 0.770861  |
| C | 3.530005  | 4.578533  | 0.857976  |
| F | 4.684317  | 5.029459  | 0.358896  |
| F | 3.300322  | 5.260752  | 1.984228  |
| F | 2.563815  | 4.892270  | -0.006877 |
| C | -2.694253 | 4.003953  | -2.568853 |
| C | -3.725303 | 4.462119  | -1.536991 |
| H | -3.251390 | 4.984604  | -0.691306 |
| H | -4.427476 | 5.164333  | -2.009889 |
| H | -4.306787 | 3.615321  | -1.145024 |
| C | -1.941668 | 5.227984  | -3.107804 |
| H | -2.656652 | 5.940613  | -3.546575 |
| H | -1.395780 | 5.743548  | -2.302585 |
| H | -1.219239 | 4.958064  | -3.892192 |
| C | -3.429852 | 3.287247  | -3.713154 |
| H | -2.737726 | 2.968400  | -4.507077 |
| H | -3.957217 | 2.399312  | -3.335122 |
| H | -4.168133 | 3.968502  | -4.163935 |
| H | -2.898602 | 1.883657  | 1.675483  |
| C | -3.362091 | 0.797757  | 4.194325  |
| C | -4.052033 | -0.567863 | 4.348749  |
| H | -3.381121 | -1.315530 | 4.797981  |
| H | -4.931029 | -0.468129 | 5.004148  |
| H | -4.385914 | -0.940792 | 3.370013  |

|   |           |           |           |
|---|-----------|-----------|-----------|
| C | -2.860239 | 1.292852  | 5.557586  |
| H | -2.352545 | 2.265168  | 5.463205  |
| H | -3.712166 | 1.417455  | 6.243309  |
| H | -2.159292 | 0.584539  | 6.023757  |
| C | -4.374247 | 1.798953  | 3.637552  |
| H | -3.929684 | 2.798100  | 3.508384  |
| H | -4.780036 | 1.467771  | 2.671237  |
| H | -5.213635 | 1.898365  | 4.341449  |
| P | -4.782218 | -0.033639 | -0.502389 |
| F | -3.160915 | -0.237580 | -0.564790 |
| F | -4.783491 | -0.583999 | 1.031033  |
| F | -4.565690 | 1.494865  | 0.065909  |
| F | -6.388129 | 0.180896  | -0.434368 |
| F | -4.758943 | 0.545716  | -2.024633 |
| F | -4.991453 | -1.539466 | -1.065499 |

#### Vibrational frequencies

|          |          |          |
|----------|----------|----------|
| 7.6051   | 11.4505  | 14.9324  |
| 15.2070  | 18.9460  | 23.3246  |
| 27.6772  | 30.0053  | 33.3475  |
| 34.5853  | 39.7170  | 50.9740  |
| 54.9899  | 56.3133  | 62.0682  |
| 63.9171  | 65.8914  | 68.1606  |
| 69.4367  | 72.9955  | 73.8454  |
| 76.9431  | 80.4372  | 84.7619  |
| 105.1284 | 125.5843 | 133.4863 |
| 140.5978 | 143.1985 | 145.7607 |

#### PC\*

|                                              |          |              |
|----------------------------------------------|----------|--------------|
| Zero-point correction=                       | 0.710301 |              |
| Thermal correction to Energy=                | 0.769137 |              |
| Thermal correction to Enthalpy=              | 0.770081 |              |
| Thermal correction to Gibbs Free Energy=     |          | 0.608480     |
| Sum of electronic and zero-point Energies=   |          | -3876.498189 |
| Sum of electronic and thermal Energies=      |          | -3876.439354 |
| Sum of electronic and thermal Enthalpies=    |          | -3876.438410 |
| Sum of electronic and thermal Free Energies= |          | -3876.600011 |

#### Cartesian coordinates

|    |           |           |           |
|----|-----------|-----------|-----------|
| Ir | 1.403182  | -0.374013 | -0.052116 |
| C  | -0.836213 | -4.322542 | -1.663262 |
| C  | -1.423258 | -3.588958 | -0.606364 |
| C  | -0.806125 | -2.430023 | -0.175842 |

|   |           |           |           |
|---|-----------|-----------|-----------|
| C | 0.920357  | -2.665298 | -1.771162 |
| C | 0.323459  | -3.852850 | -2.239696 |
| H | -1.295162 | -5.245727 | -2.020924 |
| H | -1.233920 | -1.839103 | 0.633460  |
| H | 0.788484  | -4.393732 | -3.060244 |
| C | 3.604787  | -0.067667 | -2.088760 |
| C | 2.499982  | -0.801571 | -1.623659 |
| C | 2.095533  | -2.018706 | -2.286466 |
| C | 2.885122  | -2.451708 | -3.369317 |
| C | 3.971322  | -1.731306 | -3.825513 |
| C | 4.315577  | -0.535171 | -3.175556 |
| H | 3.922217  | 0.856504  | -1.604716 |
| H | 4.549386  | -2.092224 | -4.677018 |
| N | 0.336473  | -1.989307 | -0.713583 |
| F | 2.590133  | -3.588649 | -4.000608 |
| F | 5.363874  | 0.145686  | -3.632277 |
| C | -2.659843 | -4.098531 | 0.063196  |
| F | -3.097602 | -3.280733 | 1.017998  |
| F | -2.432082 | -5.293316 | 0.639287  |
| F | -3.652529 | -4.289433 | -0.810401 |
| C | -2.093056 | 1.097104  | 3.180930  |
| C | -1.030658 | 0.285982  | 3.605586  |
| C | -0.049064 | -0.095865 | 2.708927  |
| C | -1.064826 | 1.074200  | 0.987873  |
| C | -2.071315 | 1.505830  | 1.848244  |
| H | -0.963916 | -0.074236 | 4.632643  |
| H | 0.778908  | -0.738910 | 3.013035  |
| C | -1.947221 | 2.446503  | -2.437915 |
| C | -2.006136 | 2.190297  | -1.068279 |
| C | -1.033730 | 1.410253  | -0.447718 |
| C | 0.070776  | 1.122690  | -2.462028 |
| C | -0.865242 | 1.888776  | -3.133489 |
| H | -2.839487 | 2.562034  | -0.480552 |
| H | 0.920048  | 0.677591  | -2.983529 |
| H | -0.740991 | 2.037554  | -4.206755 |
| N | -0.074031 | 0.275054  | 1.422163  |
| N | -0.007671 | 0.890093  | -1.145710 |
| C | 4.450313  | -1.313574 | 2.669574  |
| C | 4.297946  | -2.651013 | 2.987545  |
| C | 3.235640  | -3.359481 | 2.416086  |
| C | 2.346419  | -2.763448 | 1.539459  |
| C | 2.505832  | -1.407104 | 1.218045  |
| C | 3.568645  | -0.639873 | 1.806273  |

|   |           |           |           |
|---|-----------|-----------|-----------|
| H | 4.995437  | -3.136638 | 3.670694  |
| H | 1.543077  | -3.364097 | 1.111428  |
| C | 4.382317  | 3.050296  | 1.569312  |
| C | 4.522162  | 1.726805  | 1.931750  |
| C | 3.612063  | 0.760670  | 1.463298  |
| C | 2.452849  | 2.435801  | 0.273538  |
| C | 3.310366  | 3.418917  | 0.726171  |
| H | 5.088804  | 3.798639  | 1.932364  |
| H | 5.332653  | 1.419471  | 2.587986  |
| H | 1.628274  | 2.676902  | -0.398117 |
| F | 3.093985  | -4.644159 | 2.731536  |
| F | 5.475719  | -0.663858 | 3.221750  |
| N | 2.600232  | 1.149548  | 0.609033  |
| C | 3.115145  | 4.846663  | 0.328019  |
| F | 4.203794  | 5.342399  | -0.273966 |
| F | 2.881368  | 5.625912  | 1.392235  |
| F | 2.087685  | 4.999931  | -0.512004 |
| C | -2.995500 | 3.276506  | -3.165592 |
| C | -4.085311 | 3.771709  | -2.214648 |
| H | -3.676658 | 4.437535  | -1.438560 |
| H | -4.831898 | 4.345857  | -2.782550 |
| H | -4.599827 | 2.934533  | -1.722557 |
| C | -2.301816 | 4.484364  | -3.812889 |
| H | -3.045151 | 5.098944  | -4.343318 |
| H | -1.815006 | 5.115774  | -3.053731 |
| H | -1.538789 | 4.178831  | -4.544357 |
| C | -3.644553 | 2.400706  | -4.248911 |
| H | -2.909064 | 2.045879  | -4.986229 |
| H | -4.133726 | 1.528281  | -3.794027 |
| H | -4.404182 | 2.985371  | -4.790279 |
| H | -2.874931 | 2.118903  | 1.453443  |
| C | -3.236864 | 1.442611  | 4.123763  |
| C | -3.997466 | 0.136062  | 4.409394  |
| H | -3.352524 | -0.611609 | 4.895387  |
| H | -4.845529 | 0.339687  | 5.081576  |
| H | -4.388737 | -0.294875 | 3.475980  |
| C | -2.677465 | 2.026332  | 5.427386  |
| H | -2.108003 | 2.949014  | 5.236491  |
| H | -3.506089 | 2.272202  | 6.108571  |
| H | -2.018449 | 1.319154  | 5.952054  |
| C | -4.205935 | 2.447109  | 3.499260  |
| H | -3.704314 | 3.395168  | 3.249872  |
| H | -4.674440 | 2.047706  | 2.588405  |

|   |           |           |           |
|---|-----------|-----------|-----------|
| H | -5.007830 | 2.673006  | 4.217251  |
| P | -4.882225 | -0.233297 | -0.319566 |
| F | -3.281969 | -0.505347 | -0.114597 |
| F | -5.159518 | -0.758925 | 1.195029  |
| F | -4.691041 | 1.294483  | 0.262117  |
| F | -6.465117 | 0.056600  | -0.521101 |
| F | -4.581377 | 0.325132  | -1.822769 |
| F | -5.064812 | -1.733685 | -0.899942 |

#### Vibrational frequencies

|          |          |          |
|----------|----------|----------|
| 0.9688   | 14.5771  | 16.6055  |
| 20.4915  | 22.8049  | 23.8225  |
| 27.9716  | 29.9308  | 35.0006  |
| 37.1621  | 38.5060  | 45.0591  |
| 51.3857  | 53.4583  | 57.9849  |
| 61.6973  | 64.8255  | 65.7202  |
| 67.3583  | 71.1184  | 74.7339  |
| 77.0254  | 79.2957  | 84.1929  |
| 105.2411 | 124.7025 | 129.6249 |
| 139.7315 | 142.5343 | 143.2056 |

#### PC

|                                              |          |              |
|----------------------------------------------|----------|--------------|
| Zero-point correction=                       | 0.706721 |              |
| Thermal correction to Energy=                | 0.765322 |              |
| Thermal correction to Enthalpy=              | 0.766266 |              |
| Thermal correction to Gibbs Free Energy=     |          | 0.606451     |
| Sum of electronic and zero-point Energies=   |          | -3876.707917 |
| Sum of electronic and thermal Energies=      |          | -3876.649316 |
| Sum of electronic and thermal Enthalpies=    |          | -3876.648372 |
| Sum of electronic and thermal Free Energies= |          | -3876.808188 |

#### Cartesian coordinates

|    |           |           |           |
|----|-----------|-----------|-----------|
| Ir | 1.438108  | -0.367704 | -0.086427 |
| C  | -1.412858 | -3.527112 | -2.318505 |
| C  | -1.748243 | -3.093912 | -1.034445 |
| C  | -0.927519 | -2.168403 | -0.411665 |
| C  | 0.551990  | -2.126969 | -2.232998 |
| C  | -0.265519 | -3.037876 | -2.919196 |
| H  | -2.045636 | -4.243516 | -2.846034 |
| H  | -1.161259 | -1.774945 | 0.576825  |
| H  | 0.013574  | -3.361970 | -3.917892 |
| C  | 3.699201  | -0.129256 | -2.143765 |
| C  | 2.469207  | -0.690204 | -1.777783 |

|   |           |           |           |
|---|-----------|-----------|-----------|
| C | 1.813327  | -1.561247 | -2.696425 |
| C | 2.413789  | -1.813987 | -3.938399 |
| C | 3.625070  | -1.253298 | -4.307084 |
| C | 4.246663  | -0.414839 | -3.386121 |
| H | 4.245844  | 0.539370  | -1.475620 |
| H | 4.067880  | -1.465524 | -5.279777 |
| N | 0.187506  | -1.708959 | -0.988120 |
| F | 1.822364  | -2.619733 | -4.827081 |
| F | 5.415790  | 0.131077  | -3.723917 |
| C | -2.926949 | -3.674386 | -0.310307 |
| F | -3.290255 | -2.941600 | 0.737414  |
| F | -2.635220 | -4.903862 | 0.153336  |
| F | -3.979832 | -3.814378 | -1.115489 |
| C | -2.069335 | 0.324841  | 3.296557  |
| C | -0.945286 | -0.499464 | 3.614998  |
| C | 0.073995  | -0.629819 | 2.698136  |
| C | -0.947233 | 0.856574  | 1.191712  |
| C | -2.037872 | 0.993402  | 2.094102  |
| H | -0.886932 | -1.052673 | 4.552681  |
| H | 0.926492  | -1.286098 | 2.894842  |
| C | -1.691249 | 3.056167  | -1.775940 |
| C | -1.810235 | 2.465495  | -0.538473 |
| C | -0.865115 | 1.513020  | -0.070208 |
| C | 0.321733  | 1.748910  | -2.082143 |
| C | -0.567963 | 2.678800  | -2.572747 |
| H | -2.659054 | 2.697886  | 0.098853  |
| H | 1.185897  | 1.432571  | -2.672695 |
| H | -0.402721 | 3.095675  | -3.566566 |
| N | 0.087550  | -0.001103 | 1.512650  |
| N | 0.201428  | 1.173515  | -0.876174 |
| C | 4.496892  | -2.018713 | 2.327493  |
| C | 4.325367  | -3.391810 | 2.343590  |
| C | 3.267251  | -3.911645 | 1.601645  |
| C | 2.402186  | -3.114264 | 0.867378  |
| C | 2.574698  | -1.724300 | 0.856592  |
| C | 3.652394  | -1.163434 | 1.603821  |
| H | 4.994308  | -4.034195 | 2.915518  |
| H | 1.595407  | -3.595312 | 0.310791  |
| C | 4.707742  | 2.460568  | 2.006908  |
| C | 4.736272  | 1.086717  | 2.164355  |
| C | 3.764700  | 0.286660  | 1.540650  |
| C | 2.766687  | 2.205478  | 0.629453  |
| C | 3.700342  | 3.035585  | 1.226197  |

|   |           |           |           |
|---|-----------|-----------|-----------|
| H | 5.464753  | 3.083199  | 2.488227  |
| H | 5.508345  | 0.617886  | 2.768283  |
| H | 1.960195  | 2.597656  | 0.009236  |
| F | 3.090250  | -5.232940 | 1.606043  |
| F | 5.513216  | -1.523105 | 3.042045  |
| N | 2.801588  | 0.877093  | 0.777490  |
| C | 3.629969  | 4.522707  | 1.047197  |
| F | 4.777259  | 5.007867  | 0.557793  |
| F | 3.415554  | 5.145739  | 2.211805  |
| F | 2.652406  | 4.881830  | 0.214245  |
| C | -2.716308 | 4.039691  | -2.329424 |
| C | -3.789075 | 4.392120  | -1.298591 |
| H | -3.351064 | 4.873689  | -0.410166 |
| H | -4.509296 | 5.097537  | -1.741031 |
| H | -4.342239 | 3.501451  | -0.969618 |
| C | -2.009875 | 5.330779  | -2.765581 |
| H | -2.743290 | 6.045512  | -3.171697 |
| H | -1.504075 | 5.809255  | -1.912129 |
| H | -1.256353 | 5.147267  | -3.545794 |
| C | -3.400301 | 3.384745  | -3.540375 |
| H | -2.672012 | 3.122149  | -4.322616 |
| H | -3.923802 | 2.467921  | -3.232012 |
| H | -4.136954 | 4.075345  | -3.982180 |
| H | -2.886442 | 1.596311  | 1.780489  |
| C | -3.260339 | 0.381100  | 4.246052  |
| C | -3.900402 | -1.016355 | 4.288179  |
| H | -3.185077 | -1.778398 | 4.633364  |
| H | -4.761220 | -1.023143 | 4.976459  |
| H | -4.254166 | -1.302750 | 3.286767  |
| C | -2.783650 | 0.777146  | 5.650161  |
| H | -2.315673 | 1.774138  | 5.639377  |
| H | -3.637445 | 0.808935  | 6.345648  |
| H | -2.050832 | 0.063800  | 6.055489  |
| C | -4.316811 | 1.385120  | 3.784081  |
| H | -3.904865 | 2.404796  | 3.724733  |
| H | -4.723636 | 1.117707  | 2.799332  |
| H | -5.150173 | 1.401682  | 4.503516  |
| P | -5.147605 | 0.059054  | -0.452632 |
| F | -3.563317 | -0.288920 | -0.582060 |
| F | -5.196784 | -0.662299 | 1.008273  |
| F | -4.782897 | 1.483945  | 0.274877  |
| F | -6.730155 | 0.417788  | -0.324372 |
| F | -5.102909 | 0.800040  | -1.906598 |



|   |           |           |           |
|---|-----------|-----------|-----------|
| F | -5.522053 | -1.347625 | -1.173607 |
|---|-----------|-----------|-----------|

Vibrational frequencies

|          |          |          |
|----------|----------|----------|
| 1.7938   | 12.8592  | 15.6998  |
| 17.2237  | 20.8216  | 25.5874  |
| 30.3113  | 33.4308  | 35.4160  |
| 35.8711  | 41.7681  | 48.2760  |
| 51.1204  | 58.4084  | 62.4890  |
| 64.2562  | 66.4593  | 72.3533  |
| 73.2966  | 74.7429  | 76.7279  |
| 78.6899  | 80.7465  | 86.8160  |
| 103.3706 | 121.1562 | 136.0840 |
| 140.4963 | 144.3207 | 148.8096 |

**A1**

|                                              |          |              |
|----------------------------------------------|----------|--------------|
| Zero-point correction=                       | 0.634412 |              |
| Thermal correction to Energy=                | 0.671427 |              |
| Thermal correction to Enthalpy=              | 0.672371 |              |
| Thermal correction to Gibbs Free Energy=     |          | 0.562183     |
| Sum of electronic and zero-point Energies=   |          | -1343.174969 |
| Sum of electronic and thermal Energies=      |          | -1343.137955 |
| Sum of electronic and thermal Enthalpies=    |          | -1343.137011 |
| Sum of electronic and thermal Free Energies= |          | -1343.247199 |

Cartesian coordinates

|   |           |           |           |
|---|-----------|-----------|-----------|
| C | 2.405456  | 1.039262  | 1.051871  |
| C | 2.886722  | 2.093491  | 2.048724  |
| H | 2.922255  | 3.087058  | 1.577382  |
| H | 2.173314  | 2.148672  | 2.886864  |
| H | 3.878677  | 1.859449  | 2.463359  |
| C | 2.390939  | -0.324437 | 1.747636  |
| H | 1.557973  | -0.361406 | 2.465716  |
| H | 2.252097  | -1.151769 | 1.039157  |
| H | 3.325551  | -0.501817 | 2.298305  |
| N | 1.048921  | 1.510727  | 0.634450  |
| C | 0.083689  | 0.738688  | 0.325485  |
| C | -0.108483 | -0.692437 | 0.250937  |
| C | -0.780203 | -1.404951 | 1.280576  |
| C | 0.055042  | -1.389829 | -0.975692 |
| C | -1.274870 | -2.694992 | 1.098007  |
| C | -0.445757 | -2.677783 | -1.178204 |
| C | -1.117257 | -3.327744 | -0.139753 |
| H | -1.788500 | -3.231964 | 1.896035  |

|   |           |           |           |
|---|-----------|-----------|-----------|
| H | -0.320476 | -3.200393 | -2.127019 |
| O | 0.711818  | -0.682331 | -1.940442 |
| O | -0.912043 | -0.710587 | 2.446372  |
| O | -1.625424 | -4.592847 | -0.335518 |
| C | -1.594484 | -1.311494 | 3.507593  |
| H | -1.602385 | -0.588194 | 4.333656  |
| H | -2.638349 | -1.559312 | 3.242070  |
| H | -1.096016 | -2.235832 | 3.850724  |
| C | 0.862565  | -1.255290 | -3.205664 |
| H | -0.112339 | -1.473818 | -3.678343 |
| H | 1.401619  | -0.525676 | -3.824327 |
| H | 1.448963  | -2.190815 | -3.169532 |
| C | -0.741199 | -5.630488 | 0.009842  |
| H | -0.462655 | -5.591734 | 1.078850  |
| H | -1.250055 | -6.585054 | -0.188181 |
| H | 0.187400  | -5.591741 | -0.588578 |
| C | 3.196875  | 1.034023  | -0.273235 |
| H | 2.916580  | 1.969727  | -0.789661 |
| H | 2.742496  | 0.229097  | -0.874612 |
| C | 5.304218  | -0.269554 | 0.412382  |
| H | 5.231621  | -0.102586 | 1.496788  |
| H | 4.776309  | -1.207233 | 0.178794  |
| H | 6.370475  | -0.412975 | 0.170868  |
| C | 5.027431  | 0.659017  | -1.871827 |
| H | 4.619277  | 1.471251  | -2.494973 |
| H | 6.112492  | 0.602331  | -2.057533 |
| H | 4.573617  | -0.285038 | -2.213959 |
| C | 4.733579  | 0.904602  | -0.385362 |
| C | 5.455779  | 2.192885  | 0.024338  |
| H | 5.055938  | 3.059911  | -0.525789 |
| H | 5.358561  | 2.403597  | 1.097552  |
| H | 6.532264  | 2.118669  | -0.202600 |
| N | -3.188269 | 0.897724  | -0.999146 |
| C | -3.748235 | 1.907099  | -0.331183 |
| N | -3.183648 | 3.125089  | -0.286540 |
| N | -4.923899 | 1.712442  | 0.285657  |
| H | -5.503040 | 0.913110  | 0.069801  |
| C | -3.525318 | -0.481722 | -0.703078 |
| H | -2.630476 | -1.101313 | -0.847996 |
| H | -3.833947 | -0.584298 | 0.344349  |
| H | -4.328061 | -0.854404 | -1.362386 |
| C | -2.262107 | 1.107066  | -2.096608 |
| H | -2.378008 | 2.121011  | -2.496766 |

|   |           |          |           |
|---|-----------|----------|-----------|
| H | -1.224807 | 0.948966 | -1.751837 |
| H | -2.506661 | 0.389431 | -2.893243 |
| C | -1.740715 | 3.305102 | -0.212209 |
| H | -1.358996 | 3.828233 | -1.103268 |
| H | -1.517306 | 3.921910 | 0.672406  |
| H | -1.220003 | 2.324533 | -0.082813 |
| C | -3.987769 | 4.301250 | -0.024915 |
| H | -3.561185 | 5.147579 | -0.581751 |
| H | -5.019951 | 4.150142 | -0.365793 |
| H | -3.993220 | 4.568943 | 1.046219  |
| H | -5.212983 | 2.307408 | 1.049843  |

#### Vibrational frequencies

|          |          |          |
|----------|----------|----------|
| 7.0306   | 13.3267  | 16.2875  |
| 22.1140  | 27.3717  | 34.0197  |
| 41.7318  | 46.7498  | 51.7369  |
| 63.4902  | 80.9794  | 89.6504  |
| 102.0721 | 121.2043 | 125.0161 |
| 132.8003 | 143.4944 | 155.3449 |
| 161.5553 | 168.8702 | 186.0421 |
| 197.6227 | 206.5622 | 215.2721 |
| 217.2929 | 230.9295 | 237.2941 |
| 242.8529 | 243.9725 | 247.5875 |

#### <sup>3</sup>M1

|                                              |          |              |
|----------------------------------------------|----------|--------------|
| Zero-point correction=                       | 1.154957 |              |
| Thermal correction to Energy=                | 1.240151 |              |
| Thermal correction to Enthalpy=              | 1.241095 |              |
| Thermal correction to Gibbs Free Energy=     |          | 1.028327     |
| Sum of electronic and zero-point Energies=   |          | -4858.060199 |
| Sum of electronic and thermal Energies=      |          | -4857.975005 |
| Sum of electronic and thermal Enthalpies=    |          | -4857.974061 |
| Sum of electronic and thermal Free Energies= |          | -4858.186829 |

#### Cartesian coordinates

|    |           |           |           |
|----|-----------|-----------|-----------|
| Ir | -2.532149 | -0.338512 | -0.202677 |
| C  | -3.329796 | 4.411615  | 0.058827  |
| C  | -2.589103 | 3.801306  | 1.068752  |
| C  | -2.321981 | 2.446963  | 0.967229  |
| C  | -3.607579 | 2.255400  | -0.980602 |
| C  | -3.837257 | 3.636745  | -0.971118 |
| H  | -3.526065 | 5.485028  | 0.083608  |
| H  | -1.707774 | 1.943678  | 1.712102  |

|   |           |           |           |
|---|-----------|-----------|-----------|
| H | -4.438190 | 4.088588  | -1.755186 |
| C | -4.435368 | -1.084181 | -2.448922 |
| C | -3.882444 | -0.083691 | -1.645495 |
| C | -4.183771 | 1.283320  | -1.906125 |
| C | -5.029042 | 1.582630  | -2.982962 |
| C | -5.579026 | 0.598353  | -3.789697 |
| C | -5.271167 | -0.726510 | -3.498976 |
| H | -4.224562 | -2.140973 | -2.279899 |
| H | -6.230755 | 0.862518  | -4.622291 |
| N | -2.817014 | 1.700702  | -0.022916 |
| F | -5.333295 | 2.846590  | -3.273139 |
| F | -5.796148 | -1.677991 | -4.262764 |
| C | -2.156319 | 4.580532  | 2.278101  |
| F | -1.393680 | 3.854488  | 3.096105  |
| F | -3.234944 | 4.961003  | 2.983647  |
| F | -1.495815 | 5.689360  | 1.963628  |
| C | 1.284130  | 0.665694  | 2.722062  |
| C | 0.156738  | 0.043291  | 3.278983  |
| C | -0.854247 | -0.426958 | 2.455664  |
| C | 0.327471  | 0.158176  | 0.557191  |
| C | 1.375600  | 0.648353  | 1.330352  |
| H | 0.021684  | -0.029224 | 4.358532  |
| H | -1.771069 | -0.851845 | 2.870510  |
| C | 1.428650  | 0.681722  | -3.024550 |
| C | 1.490999  | 0.506646  | -1.643651 |
| C | 0.336642  | 0.239622  | -0.913026 |
| C | -0.931463 | 0.210045  | -2.845868 |
| C | 0.172438  | 0.513879  | -3.622334 |
| H | 2.436320  | 0.591410  | -1.116375 |
| H | -1.916213 | 0.069171  | -3.294877 |
| H | 0.036008  | 0.624532  | -4.698651 |
| N | -0.797830 | -0.324636 | 1.121531  |
| N | -0.855076 | 0.078652  | -1.516506 |
| C | -5.062864 | -2.701247 | 2.207631  |
| C | -5.755210 | -1.827505 | 3.004526  |
| C | -5.523151 | -0.438556 | 2.869235  |
| C | -4.617205 | 0.063818  | 1.957421  |
| C | -3.890115 | -0.813793 | 1.141203  |
| C | -4.107469 | -2.260717 | 1.248780  |
| H | -6.476028 | -2.201170 | 3.733196  |
| H | -4.488938 | 1.144753  | 1.890350  |
| C | -2.540243 | -5.155799 | -0.587352 |
| C | -3.384929 | -4.496732 | 0.262983  |

|   |           |           |           |
|---|-----------|-----------|-----------|
| C | -3.345200 | -3.078589 | 0.387666  |
| C | -1.624623 | -3.002361 | -1.246486 |
| C | -1.615359 | -4.384218 | -1.364995 |
| H | -2.574096 | -6.241724 | -0.680202 |
| H | -4.101029 | -5.052409 | 0.864253  |
| H | -0.957709 | -2.391146 | -1.855298 |
| F | -6.215338 | 0.381728  | 3.655933  |
| F | -5.296995 | -4.009013 | 2.353260  |
| N | -2.435111 | -2.351971 | -0.419126 |
| C | -0.623234 | -5.060781 | -2.243305 |
| F | -1.186369 | -6.007141 | -3.002272 |
| F | 0.336675  | -5.678751 | -1.524317 |
| F | 0.002389  | -4.205071 | -3.061627 |
| C | 2.638831  | 1.073990  | -3.859479 |
| C | 3.875802  | 1.282120  | -2.988372 |
| H | 4.175579  | 0.360278  | -2.467859 |
| H | 4.720237  | 1.597716  | -3.617904 |
| H | 3.704145  | 2.064175  | -2.234512 |
| C | 2.921637  | -0.028365 | -4.889018 |
| H | 3.784430  | 0.254465  | -5.511496 |
| H | 3.159363  | -0.981728 | -4.392670 |
| H | 2.064965  | -0.196520 | -5.558731 |
| C | 2.315031  | 2.395835  | -4.574612 |
| H | 1.470641  | 2.291022  | -5.272201 |
| H | 2.065122  | 3.181081  | -3.846074 |
| H | 3.189645  | 2.724331  | -5.156955 |
| H | 2.222975  | 1.105991  | 0.828854  |
| C | 2.269465  | 1.448282  | 3.580400  |
| C | 1.526249  | 2.714749  | 4.042452  |
| H | 0.648692  | 2.466780  | 4.658707  |
| H | 2.203082  | 3.337247  | 4.648447  |
| H | 1.184467  | 3.302565  | 3.179485  |
| C | 2.714159  | 0.636338  | 4.799390  |
| H | 3.303918  | -0.236063 | 4.492792  |
| H | 3.347885  | 1.263587  | 5.444467  |
| H | 1.865775  | 0.291971  | 5.408719  |
| C | 3.502789  | 1.868590  | 2.779492  |
| H | 4.024189  | 1.000944  | 2.349488  |
| H | 3.241832  | 2.555718  | 1.961030  |
| H | 4.206689  | 2.394957  | 3.440843  |
| P | 0.901863  | 4.187762  | -0.551188 |
| F | -0.080674 | 3.081253  | -1.242624 |
| F | 0.434242  | 3.657792  | 0.924754  |

|   |           |           |           |
|---|-----------|-----------|-----------|
| F | 2.127917  | 3.099166  | -0.532199 |
| F | 1.874751  | 5.279389  | 0.150974  |
| F | 1.379257  | 4.685580  | -2.025563 |
| F | -0.313534 | 5.264580  | -0.567691 |
| C | 6.657946  | -0.008776 | 0.179255  |
| C | 6.394228  | 1.479750  | -0.058307 |
| H | 5.697748  | 1.626794  | -0.893836 |
| H | 5.937669  | 1.918948  | 0.841828  |
| H | 7.322855  | 2.028920  | -0.266901 |
| C | 7.654281  | -0.157877 | 1.331722  |
| H | 7.226148  | 0.239001  | 2.265938  |
| H | 7.941227  | -1.206351 | 1.503385  |
| H | 8.572221  | 0.404772  | 1.126640  |
| C | 8.262094  | -0.312706 | -2.024528 |
| N | 5.337621  | -0.591880 | 0.447648  |
| C | 5.161163  | -1.377966 | 1.432220  |
| H | 5.963748  | -1.605082 | 2.151463  |
| C | 3.890958  | -2.030044 | 1.762893  |
| C | 2.891220  | -2.367660 | 0.825448  |
| C | 3.673373  | -2.411055 | 3.110443  |
| C | 1.706840  | -3.004565 | 1.222392  |
| C | 2.500540  | -3.034304 | 3.519571  |
| C | 1.513366  | -3.316590 | 2.569619  |
| H | 0.948360  | -3.254358 | 0.485919  |
| H | 2.313754  | -3.308960 | 4.555579  |
| O | 4.669134  | -2.112173 | 3.970105  |
| O | 3.137190  | -2.088667 | -0.464856 |
| O | 0.403253  | -3.905379 | 3.044328  |
| C | 2.369657  | -2.718181 | -1.458242 |
| H | 2.837793  | -2.470305 | -2.418531 |
| H | 2.355283  | -3.812220 | -1.328977 |
| H | 1.334348  | -2.344916 | -1.474764 |
| C | 4.605659  | -2.594545 | 5.290587  |
| H | 4.517764  | -3.693066 | 5.313125  |
| H | 5.542580  | -2.295282 | 5.775447  |
| H | 3.760281  | -2.153024 | 5.843715  |
| C | -0.611280 | -4.269071 | 2.141907  |
| H | -0.251260 | -4.993860 | 1.393387  |
| H | -1.410231 | -4.731582 | 2.733388  |
| H | -1.018996 | -3.389075 | 1.620403  |
| C | 7.120099  | -0.775768 | -1.088550 |
| H | 6.221649  | -0.895063 | -1.716452 |
| H | 7.364962  | -1.793879 | -0.737796 |

|   |           |           |           |
|---|-----------|-----------|-----------|
| C | 8.573208  | -1.515216 | -2.926630 |
| H | 9.338127  | -1.255456 | -3.675669 |
| H | 8.949652  | -2.367192 | -2.338272 |
| H | 7.672024  | -1.849496 | -3.465442 |
| C | 7.826004  | 0.843457  | -2.931324 |
| H | 6.911553  | 0.582215  | -3.486275 |
| H | 7.627085  | 1.767313  | -2.372928 |
| H | 8.614024  | 1.065603  | -3.668893 |
| C | 9.546833  | 0.075151  | -1.290205 |
| H | 9.429776  | 1.003563  | -0.711926 |
| H | 9.875249  | -0.718836 | -0.601527 |
| H | 10.358268 | 0.244927  | -2.016239 |

Vibrational frequencies

|         |         |         |
|---------|---------|---------|
| 11.4714 | 15.4416 | 17.8297 |
| 22.0915 | 23.2116 | 25.9571 |
| 27.7187 | 29.2152 | 30.3965 |
| 33.6166 | 35.3236 | 36.6354 |
| 38.4670 | 40.5916 | 41.8313 |
| 44.2140 | 46.2917 | 47.9418 |
| 51.6497 | 52.1412 | 56.1611 |
| 56.8383 | 65.0266 | 66.8361 |
| 69.3270 | 69.8881 | 73.9222 |
| 76.7036 | 78.8272 | 81.9003 |

<sup>3</sup>B<sub>1</sub>

|                                              |          |              |
|----------------------------------------------|----------|--------------|
| Zero-point correction=                       | 1.155597 |              |
| Thermal correction to Energy=                | 1.240287 |              |
| Thermal correction to Enthalpy=              | 1.241231 |              |
| Thermal correction to Gibbs Free Energy=     |          | 1.029696     |
| Sum of electronic and zero-point Energies=   |          | -4858.053471 |
| Sum of electronic and thermal Energies=      |          | -4857.968781 |
| Sum of electronic and thermal Enthalpies=    |          | -4857.967837 |
| Sum of electronic and thermal Free Energies= |          | -4858.179372 |

Cartesian coordinates

|    |           |           |           |
|----|-----------|-----------|-----------|
| Ir | -2.501197 | -0.244333 | -0.259580 |
| C  | -3.078523 | 4.495518  | 0.373165  |
| C  | -2.314227 | 3.778701  | 1.292072  |
| C  | -2.143966 | 2.418991  | 1.094235  |
| C  | -3.528223 | 2.432164  | -0.798297 |
| C  | -3.684423 | 3.820580  | -0.674008 |
| H  | -3.207017 | 5.574900  | 0.479389  |

|   |           |           |           |
|---|-----------|-----------|-----------|
| H | -1.521512 | 1.828294  | 1.766608  |
| H | -4.296532 | 4.359426  | -1.392617 |
| C | -4.544229 | -0.732980 | -2.494189 |
| C | -3.906765 | 0.168643  | -1.634319 |
| C | -4.180040 | 1.560905  | -1.769819 |
| C | -5.056020 | 1.980553  | -2.781174 |
| C | -5.676961 | 1.093557  | -3.644985 |
| C | -5.405686 | -0.259985 | -3.474168 |
| H | -4.377556 | -1.811294 | -2.430359 |
| H | -6.352239 | 1.449944  | -4.423113 |
| N | -2.725404 | 1.769136  | 0.082970  |
| F | -5.323777 | 3.277976  | -2.949750 |
| F | -5.998063 | -1.128654 | -4.292362 |
| C | -1.756786 | 4.426411  | 2.522769  |
| F | -0.763247 | 3.718246  | 3.054075  |
| F | -2.708629 | 4.526384  | 3.468759  |
| F | -1.320931 | 5.660819  | 2.292785  |
| C | 1.334932  | 0.388853  | 2.748669  |
| C | 0.174011  | -0.287875 | 3.238345  |
| C | -0.841082 | -0.603536 | 2.362344  |
| C | 0.333857  | 0.256816  | 0.519370  |
| C | 1.400175  | 0.613595  | 1.391056  |
| H | 0.051855  | -0.526695 | 4.295342  |
| H | -1.764620 | -1.069583 | 2.723026  |
| C | 1.344694  | 1.239682  | -2.982230 |
| C | 1.414273  | 1.057625  | -1.618438 |
| C | 0.315328  | 0.536378  | -0.879823 |
| C | -0.929589 | 0.428936  | -2.869957 |
| C | 0.123712  | 0.884658  | -3.628605 |
| H | 2.314037  | 1.333080  | -1.070763 |
| H | -1.890549 | 0.183693  | -3.334366 |
| H | -0.007471 | 0.993177  | -4.706006 |
| N | -0.802756 | -0.332880 | 1.047467  |
| N | -0.862808 | 0.259284  | -1.540742 |
| C | -5.101325 | -2.793759 | 1.905101  |
| C | -5.799619 | -2.014352 | 2.808666  |
| C | -5.542955 | -0.644657 | 2.801115  |
| C | -4.627980 | -0.055645 | 1.941503  |
| C | -3.915815 | -0.847441 | 1.031757  |
| C | -4.169443 | -2.251524 | 1.006117  |
| H | -6.517730 | -2.459145 | 3.497741  |
| H | -4.482026 | 1.025879  | 2.001322  |
| C | -2.604641 | -4.976942 | -1.119562 |



|   |           |           |           |
|---|-----------|-----------|-----------|
| C | -3.474699 | -4.386260 | -0.220867 |
| C | -3.385018 | -3.009483 | 0.046633  |
| C | -1.637433 | -2.821962 | -1.508148 |
| C | -1.650412 | -4.182897 | -1.762994 |
| H | -2.662301 | -6.049309 | -1.318959 |
| H | -4.223533 | -4.983624 | 0.293099  |
| H | -0.944574 | -2.151182 | -2.019442 |
| F | -6.209543 | 0.119279  | 3.663090  |
| F | -5.336751 | -4.109133 | 1.920809  |
| N | -2.473662 | -2.253457 | -0.633927 |
| C | -0.606642 | -4.793421 | -2.646811 |
| F | -1.110972 | -5.741175 | -3.433534 |
| F | 0.359248  | -5.369372 | -1.911323 |
| F | -0.012644 | -3.884375 | -3.421691 |
| C | 2.484628  | 1.800573  | -3.823361 |
| C | 3.716416  | 2.122695  | -2.984735 |
| H | 4.146168  | 1.212344  | -2.539406 |
| H | 4.491877  | 2.574976  | -3.623456 |
| H | 3.485920  | 2.827401  | -2.173300 |
| C | 2.871959  | 0.765226  | -4.888252 |
| H | 3.725914  | 1.129230  | -5.483357 |
| H | 3.165860  | -0.189355 | -4.420160 |
| H | 2.045888  | 0.554820  | -5.584734 |
| C | 2.012439  | 3.093187  | -4.503281 |
| H | 1.132404  | 2.924823  | -5.142637 |
| H | 1.750724  | 3.845058  | -3.744586 |
| H | 2.815501  | 3.502503  | -5.138164 |
| H | 2.244039  | 1.154660  | 0.966357  |
| C | 2.366864  | 0.945206  | 3.726110  |
| C | 1.759098  | 2.191988  | 4.387746  |
| H | 0.802877  | 1.960276  | 4.883261  |
| H | 2.449851  | 2.590529  | 5.149770  |
| H | 1.578145  | 2.979171  | 3.641692  |
| C | 2.717414  | -0.076923 | 4.811598  |
| H | 3.206839  | -0.962650 | 4.382683  |
| H | 3.417484  | 0.373378  | 5.533606  |
| H | 1.836081  | -0.413445 | 5.378095  |
| C | 3.656168  | 1.356798  | 3.018608  |
| H | 4.100235  | 0.507976  | 2.475566  |
| H | 3.490595  | 2.171567  | 2.298914  |
| H | 4.393287  | 1.708244  | 3.757840  |
| P | 1.782747  | 4.493665  | 0.186061  |
| F | 0.649741  | 3.344148  | 0.383546  |

|   |           |           |           |
|---|-----------|-----------|-----------|
| F | 1.938974  | 4.614934  | 1.802284  |
| F | 2.956221  | 3.339895  | 0.172763  |
| F | 2.920953  | 5.635800  | -0.009270 |
| F | 1.646448  | 4.355569  | -1.431715 |
| F | 0.624677  | 5.632451  | 0.192860  |
| C | 6.195441  | -0.518329 | -0.212179 |
| C | 5.690877  | 0.921105  | -0.080338 |
| H | 4.626053  | 0.982555  | -0.347350 |
| H | 5.805537  | 1.276290  | 0.953710  |
| H | 6.253104  | 1.590523  | -0.741523 |
| C | 7.586224  | -0.675786 | 0.424850  |
| H | 7.553418  | -0.387171 | 1.485719  |
| H | 7.955740  | -1.707023 | 0.340880  |
| H | 8.284416  | 0.002878  | -0.083174 |
| C | 7.093227  | -0.742226 | -2.767685 |
| N | 5.328712  | -1.343462 | 0.570083  |
| C | 5.017756  | -1.933653 | 1.644862  |
| C | 3.770314  | -2.555884 | 1.917131  |
| C | 2.743619  | -2.592692 | 0.937171  |
| C | 3.541716  | -3.152855 | 3.190026  |
| C | 1.519881  | -3.190956 | 1.214592  |
| C | 2.318790  | -3.727841 | 3.476359  |
| C | 1.311032  | -3.728922 | 2.493507  |
| H | 0.732198  | -3.206625 | 0.466228  |
| H | 2.090104  | -4.176544 | 4.441464  |
| O | 4.564114  | -3.088811 | 4.044700  |
| O | 3.055350  | -2.041060 | -0.233788 |
| O | 0.164932  | -4.287628 | 2.869768  |
| C | 2.222756  | -2.258796 | -1.359144 |
| H | 2.708104  | -1.758131 | -2.204931 |
| H | 2.123999  | -3.335886 | -1.564894 |
| H | 1.236237  | -1.798696 | -1.201611 |
| C | 4.415419  | -3.622141 | 5.344968  |
| H | 4.201699  | -4.701977 | 5.307616  |
| H | 5.369143  | -3.457352 | 5.858643  |
| H | 3.611305  | -3.104739 | 5.892848  |
| C | -0.913196 | -4.342948 | 1.962614  |
| H | -0.663763 | -4.962730 | 1.085649  |
| H | -1.754606 | -4.797674 | 2.498771  |
| H | -1.199135 | -3.332047 | 1.632053  |
| C | 6.075901  | -1.080932 | -1.653785 |
| H | 5.065536  | -0.793044 | -1.993318 |
| H | 6.051367  | -2.180612 | -1.568228 |

|   |          |           |           |
|---|----------|-----------|-----------|
| C | 6.429920 | -1.202476 | -4.071697 |
| H | 7.114689 | -1.064881 | -4.923377 |
| H | 6.158587 | -2.270040 | -4.026783 |
| H | 5.513419 | -0.627694 | -4.279352 |
| C | 7.415109 | 0.746935  | -2.894609 |
| H | 6.505723 | 1.352401  | -3.028512 |
| H | 7.967031 | 1.137889  | -2.025715 |
| H | 8.053314 | 0.911113  | -3.777631 |
| C | 8.395983 | -1.532745 | -2.606416 |
| H | 8.999954 | -1.199530 | -1.751609 |
| H | 8.195089 | -2.609468 | -2.482542 |
| H | 9.019354 | -1.411571 | -3.506743 |
| H | 5.780897 | -1.960902 | 2.448103  |

#### Vibrational frequencies

|         |         |         |
|---------|---------|---------|
| 10.3362 | 10.9536 | 16.8314 |
| 19.5993 | 21.7891 | 22.7416 |
| 24.8505 | 27.7769 | 31.7278 |
| 34.1846 | 35.4044 | 36.4880 |
| 39.2576 | 45.5639 | 46.5718 |
| 48.7641 | 50.4268 | 53.3808 |
| 54.9465 | 56.5877 | 60.2641 |
| 63.5404 | 64.7181 | 72.1722 |
| 74.2835 | 75.9380 | 77.4544 |
| 78.8447 | 80.5643 | 82.2924 |

#### <sup>3</sup>B<sub>2</sub>

|                                              |          |              |
|----------------------------------------------|----------|--------------|
| Zero-point correction=                       | 1.347626 |              |
| Thermal correction to Energy=                | 1.444264 |              |
| Thermal correction to Enthalpy=              | 1.445208 |              |
| Thermal correction to Gibbs Free Energy=     |          | 1.207695     |
| Sum of electronic and zero-point Energies=   |          | -5219.835460 |
| Sum of electronic and thermal Energies=      |          | -5219.738821 |
| Sum of electronic and thermal Enthalpies=    |          | -5219.737877 |
| Sum of electronic and thermal Free Energies= |          | -5219.975390 |

#### Cartesian coordinates

|    |          |           |           |
|----|----------|-----------|-----------|
| Ir | 3.298709 | -0.552633 | -0.084442 |
| C  | 4.399620 | 3.659008  | -2.130870 |
| C  | 3.267214 | 2.967792  | -2.565419 |
| C  | 2.957110 | 1.758601  | -1.966946 |
| C  | 4.852404 | 1.857233  | -0.588776 |
| C  | 5.190382 | 3.102993  | -1.140533 |

|   |           |           |           |
|---|-----------|-----------|-----------|
| H | 4.663929  | 4.624290  | -2.567280 |
| H | 2.072093  | 1.195404  | -2.258243 |
| H | 6.080072  | 3.619698  | -0.791834 |
| C | 5.774434  | -0.958506 | 1.675868  |
| C | 5.074554  | -0.162290 | 0.761113  |
| C | 5.612983  | 1.108330  | 0.404055  |
| C | 6.813552  | 1.525787  | 0.997189  |
| C | 7.502807  | 0.746002  | 1.910706  |
| C | 6.959859  | -0.495308 | 2.228703  |
| H | 5.409706  | -1.942054 | 1.978898  |
| H | 8.432967  | 1.096538  | 2.357030  |
| N | 3.722807  | 1.222237  | -1.011687 |
| F | 7.342682  | 2.715800  | 0.695024  |
| F | 7.612463  | -1.261119 | 3.103846  |
| C | 2.441135  | 3.488881  | -3.703042 |
| F | 1.290543  | 2.831514  | -3.834276 |
| F | 3.103243  | 3.354289  | -4.866315 |
| F | 2.171603  | 4.786197  | -3.568858 |
| C | -1.090959 | 0.022784  | -2.203420 |
| C | -0.192946 | -0.957713 | -2.726978 |
| C | 0.985115  | -1.215191 | -2.062395 |
| C | 0.461392  | 0.285795  | -0.334974 |
| C | -0.754935 | 0.598971  | -0.999169 |
| H | -0.396120 | -1.484001 | -3.659244 |
| H | 1.714400  | -1.919793 | -2.471982 |
| C | 0.536539  | 2.287151  | 2.858990  |
| C | 0.084151  | 1.769062  | 1.666155  |
| C | 0.886461  | 0.895655  | 0.882189  |
| C | 2.606079  | 1.095373  | 2.469826  |
| C | 1.852796  | 1.921126  | 3.273388  |
| H | -0.905384 | 2.024605  | 1.296524  |
| H | 3.625684  | 0.815770  | 2.749554  |
| H | 2.285629  | 2.292461  | 4.202628  |
| N | 1.339345  | -0.609707 | -0.916938 |
| N | 2.160493  | 0.586078  | 1.310821  |
| C | 4.751744  | -4.053595 | -1.969476 |
| C | 5.301677  | -3.681142 | -3.182688 |
| C | 5.288275  | -2.324048 | -3.499304 |
| C | 4.750513  | -1.360958 | -2.658601 |
| C | 4.188894  | -1.740392 | -1.432956 |
| C | 4.199092  | -3.121960 | -1.077302 |
| H | 5.723910  | -4.423150 | -3.859732 |
| H | 4.773371  | -0.317542 | -2.979143 |

|   |           |           |           |
|---|-----------|-----------|-----------|
| C | 2.863985  | -4.841913 | 2.030901  |
| C | 3.514201  | -4.698493 | 0.818297  |
| C | 3.592379  | -3.436760 | 0.205099  |
| C | 2.428767  | -2.487213 | 2.008110  |
| C | 2.294144  | -3.715381 | 2.633165  |
| H | 2.796870  | -5.822303 | 2.506513  |
| H | 3.961292  | -5.559173 | 0.328358  |
| H | 2.034788  | -1.569780 | 2.445989  |
| F | 5.815955  | -1.949886 | -4.664102 |
| F | 4.754200  | -5.357206 | -1.670009 |
| N | 3.056942  | -2.351567 | 0.836452  |
| C | 1.499958  | -3.838869 | 3.897695  |
| F | 2.114319  | -4.609658 | 4.795862  |
| F | 0.301825  | -4.399240 | 3.659998  |
| F | 1.270091  | -2.651439 | 4.462945  |
| C | -0.292959 | 3.220985  | 3.733303  |
| C | -1.677031 | 3.478340  | 3.141375  |
| H | -2.248326 | 2.544389  | 3.035517  |
| H | -2.247852 | 4.145103  | 3.806230  |
| H | -1.609841 | 3.949496  | 2.152514  |
| C | -0.456418 | 2.591980  | 5.124642  |
| H | -1.047224 | 3.256084  | 5.775631  |
| H | -0.980917 | 1.625396  | 5.060548  |
| H | 0.512550  | 2.417566  | 5.615845  |
| C | 0.440281  | 4.565609  | 3.854947  |
| H | 1.442913  | 4.446862  | 4.292717  |
| H | 0.544693  | 5.029557  | 2.863856  |
| H | -0.130254 | 5.251337  | 4.502010  |
| H | -1.383972 | 1.374191  | -0.569906 |
| C | -2.289958 | 0.486445  | -3.024739 |
| C | -1.753355 | 1.375995  | -4.159279 |
| H | -1.019361 | 0.836100  | -4.777407 |
| H | -2.580604 | 1.697473  | -4.813655 |
| H | -1.268988 | 2.272917  | -3.748380 |
| C | -3.032524 | -0.709970 | -3.631272 |
| H | -3.404561 | -1.384570 | -2.847890 |
| H | -3.892298 | -0.356193 | -4.222080 |
| H | -2.394230 | -1.298379 | -4.306542 |
| C | -3.268855 | 1.308014  | -2.184369 |
| H | -3.633701 | 0.740087  | -1.315456 |
| H | -2.809955 | 2.234880  | -1.816367 |
| H | -4.134765 | 1.593511  | -2.801465 |
| P | -0.706788 | 4.742102  | -0.919682 |

|   |           |           |           |
|---|-----------|-----------|-----------|
| F | 0.432535  | 3.585682  | -1.045059 |
| F | -1.274792 | 4.348233  | -2.396896 |
| F | -1.741096 | 3.656216  | -0.246736 |
| F | -1.854428 | 5.887724  | -0.787429 |
| F | -0.155719 | 5.123860  | 0.567110  |
| F | 0.305740  | 5.824302  | -1.581312 |
| C | -5.500542 | 1.044887  | 1.872700  |
| C | -5.264482 | 2.390708  | 1.177719  |
| H | -4.202470 | 2.672241  | 1.216284  |
| H | -5.549309 | 2.311302  | 0.117657  |
| H | -5.859585 | 3.192392  | 1.629442  |
| C | -6.977098 | 0.668036  | 1.805987  |
| H | -7.304519 | 0.589334  | 0.760678  |
| H | -7.164180 | -0.296674 | 2.300271  |
| H | -7.594652 | 1.437046  | 2.288938  |
| C | -5.513092 | 1.742436  | 4.521493  |
| N | -4.668316 | 0.093281  | 1.161127  |
| C | -4.803856 | -1.000242 | 0.603639  |
| C | -3.757432 | -1.907964 | 0.175059  |
| C | -2.488917 | -1.932298 | 0.812301  |
| C | -3.991352 | -2.849771 | -0.854173 |
| C | -1.494175 | -2.829140 | 0.408470  |
| C | -3.003355 | -3.729400 | -1.276318 |
| C | -1.750141 | -3.701898 | -0.650092 |
| H | -0.523614 | -2.815723 | 0.894649  |
| H | -3.153439 | -4.431003 | -2.093791 |
| O | -5.217777 | -2.815501 | -1.416733 |
| O | -2.306528 | -1.078645 | 1.823096  |
| O | -0.843632 | -4.563546 | -1.135063 |
| C | -1.195615 | -1.238461 | 2.672274  |
| H | -1.303197 | -0.489289 | 3.465315  |
| H | -1.175536 | -2.247382 | 3.114269  |
| H | -0.252588 | -1.042857 | 2.140362  |
| C | -5.557542 | -3.801196 | -2.362478 |
| H | -5.400383 | -4.815073 | -1.961334 |
| H | -6.623166 | -3.671936 | -2.585460 |
| H | -4.978178 | -3.684359 | -3.292783 |
| C | 0.436776  | -4.598223 | -0.554239 |
| H | 0.390122  | -4.902963 | 0.504115  |
| H | 1.019391  | -5.338957 | -1.114751 |
| H | 0.935129  | -3.618741 | -0.628583 |
| C | -4.918405 | 0.987077  | 3.310481  |
| H | -3.863049 | 1.282804  | 3.206137  |

|   |            |           |           |
|---|------------|-----------|-----------|
| H | -4.890535  | -0.081038 | 3.584544  |
| C | -4.455953  | 1.630778  | 5.629556  |
| H | -4.816399  | 2.093638  | 6.561825  |
| H | -4.218201  | 0.576644  | 5.845603  |
| H | -3.521116  | 2.134011  | 5.339798  |
| C | -5.772691  | 3.226779  | 4.257269  |
| H | -4.883674  | 3.726485  | 3.843049  |
| H | -6.610003  | 3.383324  | 3.561176  |
| H | -6.035130  | 3.734555  | 5.199193  |
| C | -6.797618  | 1.086214  | 5.040586  |
| H | -7.641101  | 1.196627  | 4.346335  |
| H | -6.645952  | 0.010067  | 5.221528  |
| H | -7.097790  | 1.547327  | 5.995135  |
| N | -9.530424  | -2.141221 | -1.899812 |
| C | -8.322094  | -1.601288 | -1.653230 |
| N | -7.668405  | -0.938391 | -2.619622 |
| N | -7.774727  | -1.732392 | -0.448327 |
| H | -8.352924  | -1.954216 | 0.351276  |
| C | -10.035614 | -3.234129 | -1.092953 |
| H | -10.660638 | -3.879811 | -1.725324 |
| H | -9.203862  | -3.835694 | -0.705986 |
| H | -10.652625 | -2.877620 | -0.250269 |
| C | -10.493074 | -1.498950 | -2.776765 |
| H | -10.127545 | -0.513958 | -3.086570 |
| H | -10.702826 | -2.106064 | -3.670691 |
| H | -11.434653 | -1.354669 | -2.225024 |
| C | -7.785665  | -1.300404 | -4.020490 |
| H | -8.279724  | -0.510803 | -4.607010 |
| H | -6.775722  | -1.454229 | -4.430217 |
| H | -8.346051  | -2.235363 | -4.130024 |
| C | -6.619134  | 0.011938  | -2.304470 |
| H | -6.628656  | 0.809311  | -3.059979 |
| H | -6.794788  | 0.465937  | -1.322917 |
| H | -5.630114  | -0.467612 | -2.300787 |
| H | -6.763939  | -1.628905 | -0.284389 |

#### Vibrational frequencies

|         |         |         |
|---------|---------|---------|
| 10.0484 | 12.4824 | 16.2961 |
| 18.2578 | 19.0548 | 21.0682 |
| 24.7642 | 26.5902 | 27.9425 |
| 29.9617 | 31.5823 | 32.7370 |
| 36.4706 | 37.3471 | 38.5705 |
| 42.2114 | 44.5800 | 46.7188 |

|         |         |         |
|---------|---------|---------|
| 47.7633 | 49.6464 | 51.6392 |
| 52.6771 | 58.0705 | 59.1118 |
| 62.2832 | 65.9676 | 66.9632 |
| 71.6748 | 74.6753 | 76.4882 |

### TS1

|                                              |          |              |
|----------------------------------------------|----------|--------------|
| Zero-point correction=                       | 1.343426 |              |
| Thermal correction to Energy=                | 1.439352 |              |
| Thermal correction to Enthalpy=              | 1.440296 |              |
| Thermal correction to Gibbs Free Energy=     |          | 1.201823     |
| Sum of electronic and zero-point Energies=   |          | -5219.821746 |
| Sum of electronic and thermal Energies=      |          | -5219.725820 |
| Sum of electronic and thermal Enthalpies=    |          | -5219.724876 |
| Sum of electronic and thermal Free Energies= |          | -5219.963349 |

### Cartesian coordinates

|    |           |           |           |
|----|-----------|-----------|-----------|
| Ir | 3.237449  | -0.589922 | -0.062765 |
| C  | 4.499018  | 3.494598  | -2.269643 |
| C  | 3.334943  | 2.837732  | -2.670058 |
| C  | 2.980914  | 1.662144  | -2.029255 |
| C  | 4.888301  | 1.730902  | -0.667172 |
| C  | 5.275236  | 2.940272  | -1.264681 |
| H  | 4.800575  | 4.432272  | -2.740004 |
| H  | 2.069528  | 1.128528  | -2.293300 |
| H  | 6.186981  | 3.430239  | -0.940483 |
| C  | 5.693325  | -1.023405 | 1.717601  |
| C  | 5.027861  | -0.237100 | 0.769437  |
| C  | 5.621091  | 0.991263  | 0.353983  |
| C  | 6.841477  | 1.379411  | 0.925389  |
| C  | 7.497694  | 0.609800  | 1.871355  |
| C  | 6.900173  | -0.590355 | 2.245411  |
| H  | 5.284760  | -1.974514 | 2.063103  |
| H  | 8.446044  | 0.937254  | 2.299965  |
| N  | 3.730345  | 1.127621  | -1.061125 |
| F  | 7.423204  | 2.527326  | 0.569164  |
| F  | 7.520259  | -1.344090 | 3.154070  |
| C  | 2.518657  | 3.360503  | -3.814529 |
| F  | 1.348418  | 2.732761  | -3.929194 |
| F  | 3.171838  | 3.189600  | -4.976661 |
| F  | 2.282815  | 4.666225  | -3.698605 |
| C  | -1.142805 | 0.060543  | -2.188103 |
| C  | -0.270774 | -0.951361 | -2.696210 |
| C  | 0.903122  | -1.224684 | -2.029868 |



|   |           |           |           |
|---|-----------|-----------|-----------|
| C | 0.422213  | 0.322317  | -0.328897 |
| C | -0.790294 | 0.651192  | -0.997160 |
| H | -0.485697 | -1.488796 | -3.620147 |
| H | 1.615860  | -1.953671 | -2.428038 |
| C | 0.567093  | 2.396824  | 2.816345  |
| C | 0.094355  | 1.861208  | 1.640225  |
| C | 0.871028  | 0.953140  | 0.868843  |
| C | 2.612944  | 1.164485  | 2.430083  |
| C | 1.883133  | 2.019648  | 3.222981  |
| H | -0.891850 | 2.134456  | 1.271402  |
| H | 3.631800  | 0.874816  | 2.703964  |
| H | 2.332814  | 2.405249  | 4.139339  |
| N | 1.275192  | -0.606633 | -0.895606 |
| N | 2.143206  | 0.634575  | 1.290645  |
| C | 4.628350  | -4.212973 | -1.753010 |
| C | 5.196904  | -3.916537 | -2.979522 |
| C | 5.208405  | -2.578736 | -3.367663 |
| C | 4.679956  | -1.562136 | -2.587248 |
| C | 4.100062  | -1.866466 | -1.347775 |
| C | 4.083249  | -3.226779 | -0.920109 |
| H | 5.613990  | -4.699201 | -3.610042 |
| H | 4.724907  | -0.538117 | -2.963006 |
| C | 2.651388  | -4.762852 | 2.240165  |
| C | 3.337688  | -4.692198 | 1.042272  |
| C | 3.450506  | -3.463059 | 0.367613  |
| C | 2.253400  | -2.407891 | 2.086483  |
| C | 2.077881  | -3.601091 | 2.766406  |
| H | 2.555388  | -5.718240 | 2.762945  |
| H | 3.783771  | -5.581703 | 0.608025  |
| H | 1.856265  | -1.465424 | 2.466781  |
| F | 5.753845  | -2.275518 | -4.546167 |
| F | 4.605918  | -5.498035 | -1.385154 |
| N | 2.921891  | -2.339403 | 0.932251  |
| C | 1.234851  | -3.649740 | 4.004397  |
| F | 1.791261  | -4.403934 | 4.952891  |
| F | 0.027887  | -4.178922 | 3.743891  |
| F | 1.023732  | -2.434111 | 4.515027  |
| C | -0.240750 | 3.356853  | 3.684587  |
| C | -1.625455 | 3.626494  | 3.101304  |
| H | -2.218243 | 2.701001  | 3.021141  |
| H | -2.178012 | 4.315631  | 3.758515  |
| H | -1.563063 | 4.076049  | 2.102368  |
| C | -0.396010 | 2.747246  | 5.084138  |

|   |           |           |           |
|---|-----------|-----------|-----------|
| H | -0.985098 | 3.417543  | 5.730114  |
| H | -0.917788 | 1.778145  | 5.038543  |
| H | 0.575607  | 2.580893  | 5.571892  |
| C | 0.512306  | 4.691583  | 3.784748  |
| H | 1.515693  | 4.563011  | 4.216215  |
| H | 0.616356  | 5.145305  | 2.788017  |
| H | -0.042571 | 5.391686  | 4.430329  |
| H | -1.391078 | 1.459508  | -0.589569 |
| C | -2.326747 | 0.547105  | -3.020992 |
| C | -1.759565 | 1.413015  | -4.160565 |
| H | -1.041755 | 0.844297  | -4.772476 |
| H | -2.574152 | 1.754023  | -4.818673 |
| H | -1.246136 | 2.295856  | -3.756689 |
| C | -3.103505 | -0.626525 | -3.625112 |
| H | -3.561222 | -1.245578 | -2.840569 |
| H | -3.909241 | -0.244549 | -4.271206 |
| H | -2.470747 | -1.277160 | -4.245880 |
| C | -3.293745 | 1.394357  | -2.194625 |
| H | -3.674404 | 0.826987  | -1.330140 |
| H | -2.830310 | 2.316149  | -1.820425 |
| H | -4.151751 | 1.685246  | -2.818454 |
| P | -0.546481 | 4.765095  | -1.002586 |
| F | 0.504185  | 3.531712  | -1.165976 |
| F | -1.181385 | 4.426215  | -2.465325 |
| F | -1.639646 | 3.747079  | -0.311164 |
| F | -1.606664 | 5.988650  | -0.827307 |
| F | 0.069995  | 5.091816  | 0.470435  |
| F | 0.520905  | 5.778388  | -1.683259 |
| C | -5.542140 | 0.974192  | 2.020328  |
| C | -5.188696 | 2.239899  | 1.229214  |
| H | -4.098874 | 2.361097  | 1.149281  |
| H | -5.605018 | 2.178434  | 0.213676  |
| H | -5.602042 | 3.130320  | 1.716889  |
| C | -7.059843 | 0.760309  | 2.061683  |
| H | -7.454213 | 0.591707  | 1.049924  |
| H | -7.317773 | -0.111596 | 2.677857  |
| H | -7.542574 | 1.650419  | 2.484365  |
| C | -5.356472 | 1.744842  | 4.627099  |
| N | -4.957775 | -0.127127 | 1.309860  |
| C | -5.055270 | -1.026127 | 0.451801  |
| H | -6.172575 | -1.140302 | -0.059744 |
| C | -3.982456 | -1.916628 | 0.070945  |
| C | -2.740298 | -1.887459 | 0.763012  |

|   |           |           |           |
|---|-----------|-----------|-----------|
| C | -4.132116 | -2.849641 | -0.991510 |
| C | -1.692481 | -2.737329 | 0.411379  |
| C | -3.088687 | -3.689188 | -1.350444 |
| C | -1.872201 | -3.624195 | -0.655836 |
| H | -0.747506 | -2.686154 | 0.942849  |
| H | -3.165245 | -4.397220 | -2.171743 |
| O | -5.307611 | -2.846178 | -1.633043 |
| O | -2.646746 | -1.015781 | 1.765625  |
| O | -0.923755 | -4.457398 | -1.086921 |
| C | -1.533282 | -1.054988 | 2.633682  |
| H | -1.726516 | -0.309141 | 3.414095  |
| H | -1.429397 | -2.049621 | 3.092577  |
| H | -0.611197 | -0.778686 | 2.102823  |
| C | -5.507518 | -3.752108 | -2.695128 |
| H | -5.389529 | -4.795534 | -2.356229 |
| H | -6.533755 | -3.598735 | -3.039701 |
| H | -4.808656 | -3.555895 | -3.523197 |
| C | 0.325270  | -4.473186 | -0.437488 |
| H | 0.223435  | -4.783484 | 0.615132  |
| H | 0.947338  | -5.202856 | -0.968115 |
| H | 0.808469  | -3.486394 | -0.483694 |
| C | -4.861054 | 0.920962  | 3.414385  |
| H | -3.805035 | 1.172103  | 3.236822  |
| H | -4.864249 | -0.137309 | 3.724361  |
| C | -4.243779 | 1.618773  | 5.679199  |
| H | -4.532988 | 2.126653  | 6.612416  |
| H | -4.039177 | 0.562028  | 5.918339  |
| H | -3.306819 | 2.071966  | 5.323608  |
| C | -5.561100 | 3.228384  | 4.322168  |
| H | -4.669482 | 3.676047  | 3.859693  |
| H | -6.420716 | 3.401656  | 3.655472  |
| H | -5.764048 | 3.776323  | 5.256194  |
| C | -6.637991 | 1.165512  | 5.238980  |
| H | -7.516206 | 1.304526  | 4.598073  |
| H | -6.528779 | 0.087601  | 5.442620  |
| H | -6.852165 | 1.665092  | 6.196960  |
| N | -8.769786 | -2.498006 | -2.144105 |
| C | -8.038642 | -1.428506 | -1.695550 |
| N | -7.695047 | -0.483037 | -2.619125 |
| N | -7.668190 | -1.274755 | -0.455516 |
| H | -8.121360 | -1.932501 | 0.176840  |
| C | -8.856924 | -3.684053 | -1.328569 |
| H | -9.063555 | -4.549277 | -1.973899 |

|   |            |           |           |
|---|------------|-----------|-----------|
| H | -7.900981  | -3.862677 | -0.815965 |
| H | -9.663486  | -3.624557 | -0.571802 |
| C | -9.838207  | -2.332842 | -3.110136 |
| H | -9.857210  | -1.302422 | -3.484254 |
| H | -9.720705  | -3.020708 | -3.964211 |
| H | -10.811365 | -2.540826 | -2.636060 |
| C | -7.309732  | -0.824600 | -3.971400 |
| H | -7.789505  | -0.152042 | -4.698609 |
| H | -6.215049  | -0.735841 | -4.089868 |
| H | -7.593112  | -1.855330 | -4.210598 |
| C | -7.201094  | 0.792882  | -2.157558 |
| H | -7.377149  | 1.548279  | -2.935658 |
| H | -7.728961  | 1.092144  | -1.243329 |
| H | -6.117853  | 0.766908  | -1.943208 |

#### Vibrational frequencies

|           |         |         |
|-----------|---------|---------|
| -105.8470 | 2.3061  | 9.6562  |
| 12.8374   | 15.8974 | 16.9322 |
| 21.9526   | 23.2444 | 25.6614 |
| 28.7283   | 29.4084 | 31.2038 |
| 34.3878   | 35.1751 | 37.6021 |
| 38.0157   | 40.2866 | 42.1808 |
| 44.0632   | 46.6827 | 50.3365 |
| 52.1818   | 55.1439 | 58.6850 |
| 62.2145   | 62.7327 | 67.1755 |
| 68.8338   | 70.4891 | 73.9874 |

#### <sup>3</sup>C1

|                                              |          |              |
|----------------------------------------------|----------|--------------|
| Zero-point correction=                       | 1.155804 |              |
| Thermal correction to Energy=                | 1.240517 |              |
| Thermal correction to Enthalpy=              | 1.241461 |              |
| Thermal correction to Gibbs Free Energy=     |          | 1.030233     |
| Sum of electronic and zero-point Energies=   |          | -4858.077703 |
| Sum of electronic and thermal Energies=      |          | -4857.992990 |
| Sum of electronic and thermal Enthalpies=    |          | -4857.992046 |
| Sum of electronic and thermal Free Energies= |          | -4858.203274 |

#### Cartesian coordinates

|    |           |           |           |
|----|-----------|-----------|-----------|
| Ir | -2.076910 | -0.742177 | 0.074103  |
| C  | -4.325808 | 3.513946  | -0.273243 |
| C  | -3.386216 | 3.332804  | 0.739471  |
| C  | -2.718254 | 2.123470  | 0.815735  |
| C  | -3.974927 | 1.222672  | -0.938558 |

|   |           |           |           |
|---|-----------|-----------|-----------|
| C | -4.617546 | 2.455770  | -1.115037 |
| H | -4.840848 | 4.468724  | -0.393233 |
| H | -1.943288 | 1.965569  | 1.562724  |
| H | -5.365600 | 2.564463  | -1.894814 |
| C | -3.872830 | -2.412714 | -1.756292 |
| C | -3.563275 | -1.167731 | -1.197574 |
| C | -4.287692 | -0.021235 | -1.631380 |
| C | -5.263273 | -0.174673 | -2.627617 |
| C | -5.561924 | -1.402113 | -3.195197 |
| C | -4.854647 | -2.505995 | -2.733785 |
| H | -3.363559 | -3.330417 | -1.460319 |
| H | -6.325010 | -1.490604 | -3.967914 |
| N | -2.997754 | 1.100751  | 0.002455  |
| F | -5.949892 | 0.880066  | -3.072063 |
| F | -5.131850 | -3.697738 | -3.258617 |
| C | -3.148459 | 4.408861  | 1.757701  |
| F | -2.227823 | 4.051799  | 2.655897  |
| F | -4.281674 | 4.657852  | 2.436003  |
| F | -2.770774 | 5.562079  | 1.214927  |
| C | 1.240826  | 2.078790  | 2.297844  |
| C | 0.399398  | 1.283405  | 3.090058  |
| C | -0.391798 | 0.304410  | 2.505077  |
| C | 0.470718  | 0.762236  | 0.415079  |
| C | 1.302058  | 1.745873  | 0.945194  |
| H | 0.308924  | 1.449214  | 4.164499  |
| H | -1.090819 | -0.287491 | 3.099742  |
| C | 1.180934  | 0.826770  | -3.299414 |
| C | 1.376726  | 0.941693  | -1.924545 |
| C | 0.392166  | 0.518411  | -1.034506 |
| C | -0.922517 | -0.236512 | -2.781146 |
| C | -0.006394 | 0.208834  | -3.717026 |
| H | 2.286767  | 1.381696  | -1.525556 |
| H | -1.850912 | -0.725865 | -3.082880 |
| H | -0.236764 | 0.077320  | -4.774955 |
| N | -0.406646 | 0.084380  | 1.184705  |
| N | -0.731514 | -0.084223 | -1.465614 |
| C | -3.555739 | -3.399461 | 3.009592  |
| C | -4.386937 | -2.678576 | 3.849108  |
| C | -4.582532 | -1.333005 | 3.551378  |
| C | -3.978125 | -0.706245 | 2.469862  |
| C | -3.129967 | -1.436328 | 1.630245  |
| C | -2.921740 | -2.819250 | 1.901445  |
| H | -4.864814 | -3.150782 | 4.706957  |

|   |           |           |           |
|---|-----------|-----------|-----------|
| H | -4.185185 | 0.352425  | 2.304203  |
| C | -1.088693 | -5.426823 | -0.149673 |
| C | -1.873640 | -4.902812 | 0.861164  |
| C | -2.053830 | -3.515086 | 0.964703  |
| C | -0.656391 | -3.191342 | -0.883392 |
| C | -0.453804 | -4.552773 | -1.035092 |
| H | -0.974416 | -6.507178 | -0.255096 |
| H | -2.380195 | -5.560974 | 1.561926  |
| H | -0.208215 | -2.475821 | -1.570693 |
| F | -5.383598 | -0.625258 | 4.344643  |
| F | -3.361745 | -4.688881 | 3.297541  |
| N | -1.445165 | -2.688869 | 0.068919  |
| C | 0.439985  | -5.056191 | -2.129226 |
| F | -0.009425 | -6.197460 | -2.646996 |
| F | 1.686140  | -5.297375 | -1.678966 |
| F | 0.558983  | -4.169289 | -3.120162 |
| C | 2.157217  | 1.395544  | -4.319604 |
| C | 3.364759  | 2.037599  | -3.639730 |
| H | 3.923794  | 1.312757  | -3.031393 |
| H | 4.051009  | 2.434992  | -4.402028 |
| H | 3.059164  | 2.870402  | -2.989335 |
| C | 2.635212  | 0.277935  | -5.256250 |
| H | 3.320648  | 0.691386  | -6.012000 |
| H | 3.173848  | -0.504079 | -4.699906 |
| H | 1.799493  | -0.198996 | -5.789587 |
| C | 1.415071  | 2.474622  | -5.125365 |
| H | 0.570258  | 2.052409  | -5.689845 |
| H | 1.024873  | 3.260285  | -4.461751 |
| H | 2.104688  | 2.936116  | -5.849248 |
| H | 1.926343  | 2.316315  | 0.264992  |
| C | 1.952616  | 3.305383  | 2.860602  |
| C | 0.868221  | 4.333976  | 3.224003  |
| H | 0.175997  | 3.944421  | 3.985416  |
| H | 1.343254  | 5.241293  | 3.629114  |
| H | 0.283051  | 4.608674  | 2.336690  |
| C | 2.749878  | 2.948967  | 4.119872  |
| H | 3.531882  | 2.207951  | 3.907660  |
| H | 3.225543  | 3.856556  | 4.521306  |
| H | 2.105062  | 2.538008  | 4.910937  |
| C | 2.882851  | 3.940720  | 1.824855  |
| H | 3.650730  | 3.238254  | 1.468563  |
| H | 2.319580  | 4.302453  | 0.952127  |
| H | 3.393856  | 4.804632  | 2.275064  |

|   |           |           |           |
|---|-----------|-----------|-----------|
| P | -0.359870 | 4.458742  | -1.427263 |
| F | -0.502897 | 4.108237  | 0.164348  |
| F | 0.267633  | 5.907719  | -1.048133 |
| F | 1.150253  | 3.818693  | -1.419809 |
| F | -0.200064 | 4.789137  | -3.014265 |
| F | -0.985053 | 2.997415  | -1.793617 |
| F | -1.853607 | 5.097068  | -1.435786 |
| C | 6.221093  | 0.891134  | 0.006119  |
| C | 6.372208  | 1.212774  | -1.476234 |
| H | 5.917380  | 0.426653  | -2.094613 |
| H | 5.863633  | 2.162294  | -1.696564 |
| H | 7.428843  | 1.313740  | -1.758371 |
| C | 6.880356  | 2.004558  | 0.842471  |
| H | 6.393943  | 2.969802  | 0.636844  |
| H | 6.795929  | 1.790932  | 1.918366  |
| H | 7.944414  | 2.096724  | 0.591409  |
| C | 8.069974  | -1.114046 | -0.014926 |
| N | 4.793799  | 1.012070  | 0.316809  |
| C | 4.256993  | 0.457801  | 1.439181  |
| C | 3.448002  | -0.693066 | 1.521680  |
| C | 3.136193  | -1.532619 | 0.409838  |
| C | 2.879865  | -1.056974 | 2.784294  |
| C | 2.322271  | -2.651705 | 0.552047  |
| C | 2.052409  | -2.163699 | 2.919492  |
| C | 1.776629  | -2.956830 | 1.803524  |
| H | 2.110845  | -3.300186 | -0.293663 |
| H | 1.613242  | -2.444902 | 3.874895  |
| O | 3.225366  | -0.260882 | 3.814303  |
| O | 3.697502  | -1.171893 | -0.763428 |
| O | 0.947895  | -4.027511 | 1.969758  |
| C | 3.493884  | -1.973231 | -1.897251 |
| H | 4.098317  | -1.535030 | -2.700823 |
| H | 3.822004  | -3.012172 | -1.727187 |
| H | 2.436143  | -1.975875 | -2.209593 |
| C | 2.756082  | -0.566249 | 5.101838  |
| H | 3.098900  | -1.561703 | 5.429712  |
| H | 3.167264  | 0.196179  | 5.774218  |
| H | 1.654801  | -0.533347 | 5.152180  |
| C | 1.556323  | -5.294313 | 1.846690  |
| H | 2.395694  | -5.401189 | 2.555149  |
| H | 0.791025  | -6.045151 | 2.083283  |
| H | 1.925653  | -5.477908 | 0.824365  |
| C | 6.708903  | -0.518141 | 0.412481  |

|   |           |           |           |
|---|-----------|-----------|-----------|
| H | 5.937453  | -1.222770 | 0.065789  |
| H | 6.661743  | -0.546575 | 1.514405  |
| C | 8.252052  | -2.374708 | 0.841991  |
| H | 9.175586  | -2.908146 | 0.566083  |
| H | 8.312668  | -2.121737 | 1.912407  |
| H | 7.406901  | -3.068945 | 0.707937  |
| C | 8.071013  | -1.551096 | -1.484521 |
| H | 7.214232  | -2.210333 | -1.698536 |
| H | 8.024867  | -0.702771 | -2.179270 |
| H | 8.991122  | -2.112779 | -1.712331 |
| C | 9.257203  | -0.184881 | 0.244266  |
| H | 9.246873  | 0.698012  | -0.412215 |
| H | 9.274648  | 0.165109  | 1.288328  |
| H | 10.202479 | -0.718425 | 0.055053  |
| H | 4.388973  | 1.038614  | 2.359963  |

#### Vibrational frequencies

|         |         |         |
|---------|---------|---------|
| 8.8018  | 15.2633 | 20.3658 |
| 21.3033 | 23.4817 | 24.7327 |
| 27.9374 | 30.3449 | 31.7332 |
| 32.9873 | 34.7310 | 37.0390 |
| 39.9185 | 42.7608 | 44.2163 |
| 46.7744 | 47.8010 | 51.0329 |
| 51.7313 | 52.6628 | 58.8324 |
| 59.9458 | 64.9957 | 71.0131 |
| 71.9447 | 74.8332 | 79.1502 |
| 79.5301 | 81.5063 | 82.7839 |

#### <sup>3</sup>C2

|                                              |          |              |
|----------------------------------------------|----------|--------------|
| Zero-point correction=                       | 1.346543 |              |
| Thermal correction to Energy=                | 1.443026 |              |
| Thermal correction to Enthalpy=              | 1.443970 |              |
| Thermal correction to Gibbs Free Energy=     |          | 1.205315     |
| Sum of electronic and zero-point Energies=   |          | -5219.830975 |
| Sum of electronic and thermal Energies=      |          | -5219.734492 |
| Sum of electronic and thermal Enthalpies=    |          | -5219.733548 |
| Sum of electronic and thermal Free Energies= |          | -5219.972204 |

#### Cartesian coordinates

|    |          |           |           |
|----|----------|-----------|-----------|
| Ir | 2.579129 | -0.627902 | -0.524626 |
| C  | 4.625094 | 3.739351  | -0.699884 |
| C  | 3.400775 | 3.546530  | -1.336433 |
| C  | 2.802209 | 2.301571  | -1.259604 |



|   |           |           |           |
|---|-----------|-----------|-----------|
| C | 4.626877  | 1.401590  | -0.106857 |
| C | 5.237077  | 2.663384  | -0.082673 |
| H | 5.106888  | 4.718694  | -0.700287 |
| H | 1.824892  | 2.129955  | -1.705695 |
| H | 6.203612  | 2.781801  | 0.398041  |
| C | 4.964393  | -2.264378 | 0.478333  |
| C | 4.429304  | -1.018093 | 0.133823  |
| C | 5.212046  | 0.150095  | 0.358109  |
| C | 6.478617  | 0.013752  | 0.945658  |
| C | 7.005893  | -1.216193 | 1.302296  |
| C | 6.227555  | -2.339717 | 1.050041  |
| H | 4.421887  | -3.197686 | 0.323567  |
| H | 7.993078  | -1.291449 | 1.757313  |
| N | 3.390362  | 1.261815  | -0.660576 |
| F | 7.233257  | 1.088149  | 1.186714  |
| F | 6.717866  | -3.533692 | 1.376733  |
| C | 2.777280  | 4.652279  | -2.136178 |
| F | 1.598613  | 4.295183  | -2.650116 |
| F | 3.572677  | 4.976825  | -3.170010 |
| F | 2.601035  | 5.765023  | -1.430124 |
| C | -1.425472 | 2.066956  | -1.315283 |
| C | -0.862369 | 1.368032  | -2.393034 |
| C | 0.128664  | 0.421982  | -2.172099 |
| C | 0.004964  | 0.729581  | 0.112127  |
| C | -1.004878 | 1.675998  | -0.044436 |
| H | -1.152928 | 1.584415  | -3.421785 |
| H | 0.614980  | -0.093726 | -3.003136 |
| C | 0.610393  | 0.588000  | 3.843786  |
| C | -0.052396 | 0.746780  | 2.628076  |
| C | 0.584457  | 0.426199  | 1.431152  |
| C | 2.452113  | -0.318786 | 2.575521  |
| C | 1.894607  | 0.027534  | 3.793164  |
| H | -1.062559 | 1.145770  | 2.589939  |
| H | 3.448832  | -0.760768 | 2.511487  |
| H | 2.480040  | -0.134641 | 4.699124  |
| N | 0.599981  | 0.146170  | -0.949963 |
| N | 1.814312  | -0.121081 | 1.416048  |
| C | 3.074363  | -3.070223 | -3.939185 |
| C | 3.528492  | -2.265275 | -4.969398 |
| C | 3.750667  | -0.922245 | -4.678901 |
| C | 3.528754  | -0.377808 | -3.421116 |
| C | 3.058961  | -1.193141 | -2.385642 |
| C | 2.835214  | -2.575101 | -2.649276 |

|   |           |           |           |
|---|-----------|-----------|-----------|
| H | 3.702431  | -2.672266 | -5.965056 |
| H | 3.730403  | 0.684783  | -3.274540 |
| C | 1.961888  | -5.370392 | -0.242993 |
| C | 2.314700  | -4.760121 | -1.433032 |
| C | 2.378308  | -3.360883 | -1.513874 |
| C | 1.688975  | -3.196280 | 0.716589  |
| C | 1.630822  | -4.573220 | 0.854766  |
| H | 1.951097  | -6.458771 | -0.163172 |
| H | 2.577327  | -5.358379 | -2.301367 |
| H | 1.462512  | -2.535575 | 1.551971  |
| F | 4.193327  | -0.134311 | -5.656303 |
| F | 2.855042  | -4.357677 | -4.217440 |
| N | 2.074154  | -2.609391 | -0.418840 |
| C | 1.219102  | -5.174903 | 2.165616  |
| F | 1.853019  | -6.322025 | 2.399628  |
| F | -0.099931 | -5.447081 | 2.197246  |
| F | 1.460655  | -4.350368 | 3.187079  |
| C | 0.020759  | 1.046815  | 5.170300  |
| C | -1.362988 | 1.664525  | 4.983116  |
| H | -2.078317 | 0.943962  | 4.562600  |
| H | -1.755639 | 1.994736  | 5.956180  |
| H | -1.320137 | 2.538939  | 4.317300  |
| C | -0.079451 | -0.148583 | 6.127194  |
| H | -0.488320 | 0.179243  | 7.095410  |
| H | -0.744932 | -0.925951 | 5.722355  |
| H | 0.902782  | -0.606626 | 6.316888  |
| C | 0.958991  | 2.113285  | 5.758556  |
| H | 1.957107  | 1.704342  | 5.975737  |
| H | 1.077660  | 2.956751  | 5.062798  |
| H | 0.540958  | 2.493854  | 6.703526  |
| H | -1.394368 | 2.168622  | 0.840771  |
| C | -2.350579 | 3.261309  | -1.531101 |
| C | -1.506487 | 4.376526  | -2.171585 |
| H | -1.097137 | 4.066778  | -3.144849 |
| H | -2.135798 | 5.265555  | -2.334929 |
| H | -0.667241 | 4.653179  | -1.520049 |
| C | -3.506002 | 2.907980  | -2.474737 |
| H | -4.147548 | 2.116522  | -2.064785 |
| H | -4.126268 | 3.802072  | -2.640086 |
| H | -3.144563 | 2.574253  | -3.458866 |
| C | -2.912550 | 3.785992  | -0.208047 |
| H | -3.476135 | 3.015875  | 0.338243  |
| H | -2.110525 | 4.153277  | 0.448902  |

|   |           |           |           |
|---|-----------|-----------|-----------|
| H | -3.591819 | 4.627642  | -0.408768 |
| P | 1.257130  | 4.373928  | 1.815011  |
| F | 0.851098  | 4.118635  | 0.251625  |
| F | 0.488622  | 5.804218  | 1.778357  |
| F | -0.138142 | 3.650508  | 2.281168  |
| F | 1.646089  | 4.609022  | 3.379352  |
| F | 2.021427  | 2.932712  | 1.841686  |
| F | 2.638335  | 5.093965  | 1.354934  |
| C | -5.181549 | 0.513095  | 2.320215  |
| C | -4.831681 | 0.704641  | 3.791700  |
| H | -4.211461 | -0.123223 | 4.163535  |
| H | -4.269097 | 1.641255  | 3.912575  |
| H | -5.738104 | 0.767698  | 4.409119  |
| C | -6.067592 | 1.683023  | 1.847481  |
| H | -5.510395 | 2.627892  | 1.937727  |
| H | -6.383286 | 1.545797  | 0.801856  |
| H | -6.963439 | 1.759826  | 2.476773  |
| C | -6.979050 | -1.503935 | 2.714232  |
| N | -3.938730 | 0.687400  | 1.562786  |
| C | -3.789565 | 0.197559  | 0.301143  |
| C | -3.027638 | -0.921582 | -0.091480 |
| C | -2.372074 | -1.799747 | 0.824333  |
| C | -2.866691 | -1.211256 | -1.483897 |
| C | -1.638974 | -2.897262 | 0.383867  |
| C | -2.121778 | -2.297865 | -1.922343 |
| C | -1.513419 | -3.139565 | -0.988540 |
| H | -1.169342 | -3.573639 | 1.092791  |
| H | -2.001516 | -2.528448 | -2.979121 |
| O | -3.505660 | -0.371453 | -2.321939 |
| O | -2.537645 | -1.500780 | 2.129684  |
| O | -0.782256 | -4.186916 | -1.464688 |
| C | -1.939090 | -2.314057 | 3.103272  |
| H | -2.255346 | -1.919161 | 4.076422  |
| H | -2.267369 | -3.363393 | 3.019075  |
| H | -0.838369 | -2.273993 | 3.044574  |
| C | -3.408999 | -0.592670 | -3.703984 |
| H | -3.866671 | -1.553681 | -3.990967 |
| H | -3.953363 | 0.223630  | -4.189560 |
| H | -2.359964 | -0.579564 | -4.042768 |
| C | -1.240837 | -5.473620 | -1.115394 |
| H | -2.282254 | -5.625981 | -1.447489 |
| H | -0.592673 | -6.196452 | -1.628204 |
| H | -1.181567 | -5.657400 | -0.030664 |

|   |           |           |           |
|---|-----------|-----------|-----------|
| C | -5.776498 | -0.870613 | 1.981162  |
| H | -4.945314 | -1.588334 | 2.065073  |
| H | -6.015050 | -0.827693 | 0.906354  |
| C | -7.398495 | -2.707718 | 1.858370  |
| H | -8.212616 | -3.269822 | 2.342697  |
| H | -7.754617 | -2.386813 | 0.866248  |
| H | -6.553323 | -3.397558 | 1.703751  |
| C | -6.589156 | -2.034647 | 4.098481  |
| H | -5.716907 | -2.704594 | 4.029597  |
| H | -6.341096 | -1.230596 | 4.803584  |
| H | -7.421251 | -2.610420 | 4.534648  |
| C | -8.182920 | -0.568885 | 2.844997  |
| H | -7.991772 | 0.256413  | 3.546990  |
| H | -8.462016 | -0.132133 | 1.873378  |
| H | -9.053997 | -1.125479 | 3.226576  |
| H | -4.247934 | 0.795466  | -0.495317 |
| N | -6.936449 | -0.862553 | -3.132738 |
| C | -7.133417 | 0.366158  | -2.512965 |
| N | -7.255640 | 1.441545  | -3.368505 |
| N | -7.199306 | 0.551366  | -1.237799 |
| H | -7.296479 | -0.340927 | -0.756298 |
| C | -6.467864 | -1.955803 | -2.321024 |
| H | -6.035759 | -2.730481 | -2.972611 |
| H | -5.681587 | -1.610622 | -1.636734 |
| H | -7.273508 | -2.435491 | -1.728365 |
| C | -7.772152 | -1.258078 | -4.246773 |
| H | -8.258292 | -0.380802 | -4.688549 |
| H | -7.181497 | -1.764319 | -5.028338 |
| H | -8.567138 | -1.953779 | -3.917568 |
| C | -6.477258 | 1.546836  | -4.580050 |
| H | -7.094735 | 1.912684  | -5.417110 |
| H | -5.635527 | 2.252354  | -4.449454 |
| H | -6.062944 | 0.571794  | -4.855574 |
| C | -7.674205 | 2.703144  | -2.812941 |
| H | -8.117582 | 3.320480  | -3.609500 |
| H | -8.417119 | 2.534689  | -2.024636 |
| H | -6.832498 | 3.266569  | -2.366688 |

Vibrational frequencies

|         |         |         |
|---------|---------|---------|
| 9.1371  | 12.6379 | 14.6409 |
| 17.1953 | 19.0965 | 20.5593 |
| 25.1608 | 27.2138 | 28.5597 |
| 29.5826 | 29.9291 | 32.2621 |

|         |         |         |
|---------|---------|---------|
| 33.7444 | 35.4923 | 37.2617 |
| 39.7222 | 40.1698 | 42.2772 |
| 45.4764 | 47.0910 | 48.1585 |
| 49.0266 | 50.8241 | 55.6029 |
| 56.4775 | 59.3846 | 64.3986 |
| 67.5997 | 70.5707 | 71.5992 |

### TSpcet

|                                              |          |              |
|----------------------------------------------|----------|--------------|
| Zero-point correction=                       | 1.342373 |              |
| Thermal correction to Energy=                | 1.438164 |              |
| Thermal correction to Enthalpy=              | 1.439108 |              |
| Thermal correction to Gibbs Free Energy=     |          | 1.203587     |
| Sum of electronic and zero-point Energies=   |          | -5219.812933 |
| Sum of electronic and thermal Energies=      |          | -5219.717141 |
| Sum of electronic and thermal Enthalpies=    |          | -5219.716197 |
| Sum of electronic and thermal Free Energies= |          | -5219.951718 |

### Cartesian coordinates

|    |           |           |           |
|----|-----------|-----------|-----------|
| Ir | 2.675701  | -0.671535 | -0.241697 |
| C  | 4.361078  | 3.585166  | -1.751024 |
| C  | 3.189153  | 3.086234  | -2.317943 |
| C  | 2.690228  | 1.878598  | -1.860129 |
| C  | 4.528971  | 1.564472  | -0.444200 |
| C  | 5.029291  | 2.822249  | -0.810400 |
| H  | 4.758760  | 4.555504  | -2.054065 |
| H  | 1.749613  | 1.480349  | -2.238058 |
| H  | 5.957434  | 3.178153  | -0.372674 |
| C  | 5.152006  | -1.692586 | 1.257214  |
| C  | 4.524252  | -0.667991 | 0.537313  |
| C  | 5.196089  | 0.581072  | 0.399906  |
| C  | 6.443235  | 0.751753  | 1.018857  |
| C  | 7.057970  | -0.253327 | 1.746819  |
| C  | 6.389913  | -1.469392 | 1.842825  |
| H  | 4.694790  | -2.674498 | 1.389764  |
| H  | 8.026910  | -0.091102 | 2.218043  |
| N  | 3.334623  | 1.142076  | -0.949033 |
| F  | 7.094553  | 1.915235  | 0.926281  |
| F  | 6.968342  | -2.453150 | 2.532669  |
| C  | 2.523734  | 3.819467  | -3.443443 |
| F  | 1.382476  | 3.242096  | -3.818818 |
| F  | 3.327351  | 3.832500  | -4.523568 |
| F  | 2.268607  | 5.091843  | -3.150102 |
| C  | -1.511907 | 1.240952  | -1.892449 |

|   |           |           |           |
|---|-----------|-----------|-----------|
| C | -0.844347 | 0.267103  | -2.692322 |
| C | 0.220727  | -0.436361 | -2.167220 |
| C | -0.016086 | 0.582324  | -0.081758 |
| C | -1.106369 | 1.332721  | -0.577277 |
| H | -1.116390 | 0.103778  | -3.735739 |
| H | 0.782011  | -1.142176 | -2.785831 |
| C | 0.493454  | 1.756312  | 3.465274  |
| C | -0.128670 | 1.489905  | 2.263010  |
| C | 0.534844  | 0.791136  | 1.227794  |
| C | 2.410183  | 0.563676  | 2.605581  |
| C | 1.810829  | 1.254634  | 3.635791  |
| H | -1.144494 | 1.827829  | 2.076960  |
| H | 3.425497  | 0.172477  | 2.708194  |
| H | 2.371012  | 1.416478  | 4.557066  |
| N | 0.677697  | -0.267074 | -0.915585 |
| N | 1.808824  | 0.332809  | 1.429157  |
| C | 3.472433  | -4.021483 | -2.697597 |
| C | 3.916265  | -3.554357 | -3.922159 |
| C | 4.040229  | -2.174910 | -4.070366 |
| C | 3.731856  | -1.279171 | -3.057032 |
| C | 3.270390  | -1.753385 | -1.822437 |
| C | 3.150012  | -3.162784 | -1.636836 |
| H | 4.156066  | -4.241888 | -4.732720 |
| H | 3.853857  | -0.212327 | -3.253486 |
| C | 2.299407  | -5.117604 | 1.500793  |
| C | 2.699673  | -4.886062 | 0.197043  |
| C | 2.696237  | -3.581182 | -0.320593 |
| C | 1.894066  | -2.769098 | 1.724176  |
| C | 1.869288  | -4.038482 | 2.277841  |
| H | 2.324782  | -6.126356 | 1.916422  |
| H | 3.039082  | -5.707926 | -0.427896 |
| H | 1.611840  | -1.889170 | 2.301634  |
| F | 4.471297  | -1.707933 | -5.242254 |
| F | 3.345829  | -5.345309 | -2.556251 |
| N | 2.308224  | -2.543704 | 0.475410  |
| C | 1.366047  | -4.224188 | 3.677004  |
| F | 1.931514  | -5.272725 | 4.272452  |
| F | 0.033419  | -4.439306 | 3.697760  |
| F | 1.584372  | -3.148173 | 4.434534  |
| C | -0.144846 | 2.590439  | 4.568808  |
| C | -1.573096 | 2.997132  | 4.216462  |
| H | -2.217406 | 2.113876  | 4.092940  |
| H | -1.999606 | 3.610898  | 5.024205  |

|   |           |           |           |
|---|-----------|-----------|-----------|
| H | -1.606949 | 3.583023  | 3.286413  |
| C | -0.166470 | 1.788918  | 5.877423  |
| H | -0.616808 | 2.389059  | 6.683728  |
| H | -0.760300 | 0.868176  | 5.765699  |
| H | 0.844833  | 1.501238  | 6.200619  |
| C | 0.697065  | 3.863515  | 4.752777  |
| H | 1.730629  | 3.626448  | 5.046502  |
| H | 0.733911  | 4.447349  | 3.821533  |
| H | 0.259133  | 4.494600  | 5.542745  |
| H | -1.540461 | 2.082030  | 0.079021  |
| C | -2.501735 | 2.220376  | -2.517925 |
| C | -1.723573 | 3.140515  | -3.472010 |
| H | -1.185153 | 2.567530  | -4.241318 |
| H | -2.418763 | 3.827491  | -3.981924 |
| H | -0.990772 | 3.735546  | -2.910511 |
| C | -3.580989 | 1.470927  | -3.306210 |
| H | -4.127646 | 0.765322  | -2.666191 |
| H | -4.299712 | 2.187877  | -3.732925 |
| H | -3.151947 | 0.898493  | -4.142594 |
| C | -3.173119 | 3.100669  | -1.462938 |
| H | -3.704129 | 2.494978  | -0.716613 |
| H | -2.441642 | 3.730197  | -0.935882 |
| H | -3.903528 | 3.766946  | -1.947293 |
| P | 0.715689  | 4.886358  | 0.276085  |
| F | 0.591378  | 3.919526  | -1.033430 |
| F | -0.203748 | 6.004408  | -0.470654 |
| F | -0.641480 | 4.209564  | 0.898362  |
| F | 0.823253  | 5.846171  | 1.590694  |
| F | 1.633169  | 3.766582  | 1.017456  |
| F | 2.055835  | 5.571164  | -0.341760 |
| C | -5.383795 | 1.275782  | 1.568498  |
| C | -4.744317 | 2.455718  | 2.296116  |
| H | -4.029953 | 2.110975  | 3.053185  |
| H | -4.204364 | 3.089907  | 1.578340  |
| H | -5.510132 | 3.070095  | 2.786228  |
| C | -6.397931 | 1.783699  | 0.534190  |
| H | -5.896563 | 2.415488  | -0.212713 |
| H | -6.875896 | 0.940452  | 0.020124  |
| H | -7.165587 | 2.388834  | 1.031242  |
| C | -6.906265 | 0.496822  | 3.692421  |
| N | -4.322558 | 0.602577  | 0.854267  |
| C | -4.182640 | -0.305125 | -0.005188 |
| C | -3.124815 | -1.272147 | -0.084418 |

|   |           |           |           |
|---|-----------|-----------|-----------|
| C | -2.359120 | -1.619789 | 1.067392  |
| C | -2.881051 | -1.980221 | -1.292137 |
| C | -1.460192 | -2.682978 | 1.023752  |
| C | -1.961574 | -3.022506 | -1.336905 |
| C | -1.278384 | -3.376896 | -0.174456 |
| H | -0.902266 | -2.986955 | 1.905038  |
| H | -1.762329 | -3.585492 | -2.245828 |
| O | -3.595387 | -1.595218 | -2.356964 |
| O | -2.602697 | -0.915961 | 2.178144  |
| O | -0.416211 | -4.422844 | -0.250859 |
| C | -1.928446 | -1.250567 | 3.369310  |
| H | -2.310994 | -0.571166 | 4.140094  |
| H | -2.132478 | -2.291800 | 3.667353  |
| H | -0.842168 | -1.100143 | 3.268337  |
| C | -3.310320 | -2.172965 | -3.608423 |
| H | -3.598566 | -3.236209 | -3.638127 |
| H | -3.895134 | -1.617541 | -4.348457 |
| H | -2.240805 | -2.076654 | -3.850573 |
| C | -0.790699 | -5.574940 | 0.476819  |
| H | -1.781934 | -5.936609 | 0.154332  |
| H | -0.040796 | -6.346552 | 0.263013  |
| H | -0.810434 | -5.390041 | 1.562467  |
| C | -5.973248 | 0.183858  | 2.501396  |
| H | -5.111974 | -0.371632 | 2.905944  |
| H | -6.497463 | -0.519513 | 1.831743  |
| C | -7.477692 | -0.859138 | 4.130592  |
| H | -8.118204 | -0.742747 | 5.018864  |
| H | -8.085051 | -1.312704 | 3.331269  |
| H | -6.671910 | -1.565938 | 4.385774  |
| C | -6.138731 | 1.084036  | 4.882768  |
| H | -5.276499 | 0.450731  | 5.146921  |
| H | -5.765169 | 2.097826  | 4.689451  |
| H | -6.795878 | 1.139874  | 5.765031  |
| C | -8.075678 | 1.414867  | 3.331535  |
| H | -7.746594 | 2.440376  | 3.107290  |
| H | -8.633864 | 1.034821  | 2.461726  |
| H | -8.777399 | 1.478123  | 4.178119  |
| H | -5.155598 | -0.511616 | -0.730213 |
| N | -6.764414 | -2.783503 | -2.863796 |
| C | -6.703192 | -1.485221 | -2.436273 |
| N | -6.905481 | -0.513655 | -3.366857 |
| N | -6.470894 | -1.150184 | -1.188885 |
| H | -6.557417 | -1.947108 | -0.561315 |



|   |           |           |           |
|---|-----------|-----------|-----------|
| C | -6.165453 | -3.829869 | -2.069110 |
| H | -5.850867 | -4.649692 | -2.731915 |
| H | -5.276997 | -3.451723 | -1.548481 |
| H | -6.866744 | -4.250137 | -1.324419 |
| C | -7.756505 | -3.227377 | -3.822349 |
| H | -8.376202 | -2.384717 | -4.148526 |
| H | -7.293766 | -3.693277 | -4.707740 |
| H | -8.419769 | -3.972005 | -3.351006 |
| C | -6.527311 | -0.654752 | -4.754188 |
| H | -7.395251 | -0.554932 | -5.427018 |
| H | -5.799577 | 0.129984  | -5.020840 |
| H | -6.060092 | -1.629526 | -4.927933 |
| C | -7.299633 | 0.816190  | -2.965666 |
| H | -8.048265 | 1.200962  | -3.675918 |
| H | -7.738018 | 0.782324  | -1.963142 |
| H | -6.447461 | 1.516365  | -2.954443 |

#### Vibrational frequencies

|           |         |         |
|-----------|---------|---------|
| -307.5258 | 6.5380  | 14.3252 |
| 16.0731   | 19.0770 | 20.5664 |
| 23.5531   | 25.4756 | 28.1228 |
| 30.0904   | 30.7387 | 32.9767 |
| 36.2051   | 37.5054 | 38.4417 |
| 39.2381   | 40.1803 | 41.5042 |
| 44.3830   | 45.7566 | 48.6082 |
| 48.8615   | 53.2557 | 55.9976 |
| 59.9662   | 64.6774 | 65.2232 |
| 66.8655   | 71.5992 | 73.2931 |

#### <sup>3</sup>M2

|                                              |          |              |
|----------------------------------------------|----------|--------------|
| Zero-point correction=                       | 1.347626 |              |
| Thermal correction to Energy=                | 1.444264 |              |
| Thermal correction to Enthalpy=              | 1.445208 |              |
| Thermal correction to Gibbs Free Energy=     |          | 1.207695     |
| Sum of electronic and zero-point Energies=   |          | -5219.835460 |
| Sum of electronic and thermal Energies=      |          | -5219.738821 |
| Sum of electronic and thermal Enthalpies=    |          | -5219.737877 |
| Sum of electronic and thermal Free Energies= |          | -5219.975390 |

#### Cartesian coordinates

|    |          |           |           |
|----|----------|-----------|-----------|
| Ir | 3.298709 | -0.552633 | -0.084442 |
| C  | 4.399620 | 3.659008  | -2.130870 |
| C  | 3.267214 | 2.967792  | -2.565419 |

|   |           |           |           |
|---|-----------|-----------|-----------|
| C | 2.957110  | 1.758601  | -1.966946 |
| C | 4.852404  | 1.857233  | -0.588776 |
| C | 5.190382  | 3.102993  | -1.140533 |
| H | 4.663929  | 4.624290  | -2.567280 |
| H | 2.072093  | 1.195404  | -2.258243 |
| H | 6.080072  | 3.619698  | -0.791834 |
| C | 5.774434  | -0.958506 | 1.675868  |
| C | 5.074554  | -0.162290 | 0.761113  |
| C | 5.612983  | 1.108330  | 0.404055  |
| C | 6.813552  | 1.525787  | 0.997189  |
| C | 7.502807  | 0.746002  | 1.910706  |
| C | 6.959859  | -0.495308 | 2.228703  |
| H | 5.409706  | -1.942054 | 1.978898  |
| H | 8.432967  | 1.096538  | 2.357030  |
| N | 3.722807  | 1.222237  | -1.011687 |
| F | 7.342682  | 2.715800  | 0.695024  |
| F | 7.612463  | -1.261119 | 3.103846  |
| C | 2.441135  | 3.488881  | -3.703042 |
| F | 1.290543  | 2.831514  | -3.834276 |
| F | 3.103243  | 3.354289  | -4.866315 |
| F | 2.171603  | 4.786197  | -3.568858 |
| C | -1.090959 | 0.022784  | -2.203420 |
| C | -0.192946 | -0.957713 | -2.726978 |
| C | 0.985115  | -1.215191 | -2.062395 |
| C | 0.461392  | 0.285795  | -0.334974 |
| C | -0.754935 | 0.598971  | -0.999169 |
| H | -0.396120 | -1.484001 | -3.659244 |
| H | 1.714400  | -1.919793 | -2.471982 |
| C | 0.536539  | 2.287151  | 2.858990  |
| C | 0.084151  | 1.769062  | 1.666155  |
| C | 0.886461  | 0.895655  | 0.882189  |
| C | 2.606079  | 1.095373  | 2.469826  |
| C | 1.852796  | 1.921126  | 3.273388  |
| H | -0.905384 | 2.024605  | 1.296524  |
| H | 3.625684  | 0.815770  | 2.749554  |
| H | 2.285629  | 2.292461  | 4.202628  |
| N | 1.339345  | -0.609707 | -0.916938 |
| N | 2.160493  | 0.586078  | 1.310821  |
| C | 4.751744  | -4.053595 | -1.969476 |
| C | 5.301677  | -3.681142 | -3.182688 |
| C | 5.288275  | -2.324048 | -3.499304 |
| C | 4.750513  | -1.360958 | -2.658601 |
| C | 4.188894  | -1.740392 | -1.432956 |

|   |           |           |           |
|---|-----------|-----------|-----------|
| C | 4.199092  | -3.121960 | -1.077302 |
| H | 5.723910  | -4.423150 | -3.859732 |
| H | 4.773371  | -0.317542 | -2.979143 |
| C | 2.863985  | -4.841913 | 2.030901  |
| C | 3.514201  | -4.698493 | 0.818297  |
| C | 3.592379  | -3.436760 | 0.205099  |
| C | 2.428767  | -2.487213 | 2.008110  |
| C | 2.294144  | -3.715381 | 2.633165  |
| H | 2.796870  | -5.822303 | 2.506513  |
| H | 3.961292  | -5.559173 | 0.328358  |
| H | 2.034788  | -1.569780 | 2.445989  |
| F | 5.815955  | -1.949886 | -4.664102 |
| F | 4.754200  | -5.357206 | -1.670009 |
| N | 3.056942  | -2.351567 | 0.836452  |
| C | 1.499958  | -3.838869 | 3.897695  |
| F | 2.114319  | -4.609658 | 4.795862  |
| F | 0.301825  | -4.399240 | 3.659998  |
| F | 1.270091  | -2.651439 | 4.462945  |
| C | -0.292959 | 3.220985  | 3.733303  |
| C | -1.677031 | 3.478340  | 3.141375  |
| H | -2.248326 | 2.544389  | 3.035517  |
| H | -2.247852 | 4.145103  | 3.806230  |
| H | -1.609841 | 3.949496  | 2.152514  |
| C | -0.456418 | 2.591980  | 5.124642  |
| H | -1.047224 | 3.256084  | 5.775631  |
| H | -0.980917 | 1.625396  | 5.060548  |
| H | 0.512550  | 2.417566  | 5.615845  |
| C | 0.440281  | 4.565609  | 3.854947  |
| H | 1.442913  | 4.446862  | 4.292717  |
| H | 0.544693  | 5.029557  | 2.863856  |
| H | -0.130254 | 5.251337  | 4.502010  |
| H | -1.383972 | 1.374191  | -0.569906 |
| C | -2.289958 | 0.486445  | -3.024739 |
| C | -1.753355 | 1.375995  | -4.159279 |
| H | -1.019361 | 0.836100  | -4.777407 |
| H | -2.580604 | 1.697473  | -4.813655 |
| H | -1.268988 | 2.272917  | -3.748380 |
| C | -3.032524 | -0.709970 | -3.631272 |
| H | -3.404561 | -1.384570 | -2.847890 |
| H | -3.892298 | -0.356193 | -4.222080 |
| H | -2.394230 | -1.298379 | -4.306542 |
| C | -3.268855 | 1.308014  | -2.184369 |
| H | -3.633701 | 0.740087  | -1.315456 |

|   |           |           |           |
|---|-----------|-----------|-----------|
| H | -2.809955 | 2.234880  | -1.816367 |
| H | -4.134765 | 1.593511  | -2.801465 |
| P | -0.706788 | 4.742102  | -0.919682 |
| F | 0.432535  | 3.585682  | -1.045059 |
| F | -1.274792 | 4.348233  | -2.396896 |
| F | -1.741096 | 3.656216  | -0.246736 |
| F | -1.854428 | 5.887724  | -0.787429 |
| F | -0.155719 | 5.123860  | 0.567110  |
| F | 0.305740  | 5.824302  | -1.581312 |
| C | -5.500542 | 1.044887  | 1.872700  |
| C | -5.264482 | 2.390708  | 1.177719  |
| H | -4.202470 | 2.672241  | 1.216284  |
| H | -5.549309 | 2.311302  | 0.117657  |
| H | -5.859585 | 3.192392  | 1.629442  |
| C | -6.977098 | 0.668036  | 1.805987  |
| H | -7.304519 | 0.589334  | 0.760678  |
| H | -7.164180 | -0.296674 | 2.300271  |
| H | -7.594652 | 1.437046  | 2.288938  |
| C | -5.513092 | 1.742436  | 4.521493  |
| N | -4.668316 | 0.093281  | 1.161127  |
| C | -4.803856 | -1.000242 | 0.603639  |
| C | -3.757432 | -1.907964 | 0.175059  |
| C | -2.488917 | -1.932298 | 0.812301  |
| C | -3.991352 | -2.849771 | -0.854173 |
| C | -1.494175 | -2.829140 | 0.408470  |
| C | -3.003355 | -3.729400 | -1.276318 |
| C | -1.750141 | -3.701898 | -0.650092 |
| H | -0.523614 | -2.815723 | 0.894649  |
| H | -3.153439 | -4.431003 | -2.093791 |
| O | -5.217777 | -2.815501 | -1.416733 |
| O | -2.306528 | -1.078645 | 1.823096  |
| O | -0.843632 | -4.563546 | -1.135063 |
| C | -1.195615 | -1.238461 | 2.672274  |
| H | -1.303197 | -0.489289 | 3.465315  |
| H | -1.175536 | -2.247382 | 3.114269  |
| H | -0.252588 | -1.042857 | 2.140362  |
| C | -5.557542 | -3.801196 | -2.362478 |
| H | -5.400383 | -4.815073 | -1.961334 |
| H | -6.623166 | -3.671936 | -2.585460 |
| H | -4.978178 | -3.684359 | -3.292783 |
| C | 0.436776  | -4.598223 | -0.554239 |
| H | 0.390122  | -4.902963 | 0.504115  |
| H | 1.019391  | -5.338957 | -1.114751 |

|   |            |           |           |
|---|------------|-----------|-----------|
| H | 0.935129   | -3.618741 | -0.628583 |
| C | -4.918405  | 0.987077  | 3.310481  |
| H | -3.863049  | 1.282804  | 3.206137  |
| H | -4.890535  | -0.081038 | 3.584544  |
| C | -4.455953  | 1.630778  | 5.629556  |
| H | -4.816399  | 2.093638  | 6.561825  |
| H | -4.218201  | 0.576644  | 5.845603  |
| H | -3.521116  | 2.134011  | 5.339798  |
| C | -5.772691  | 3.226779  | 4.257269  |
| H | -4.883674  | 3.726485  | 3.843049  |
| H | -6.610003  | 3.383324  | 3.561176  |
| H | -6.035130  | 3.734555  | 5.199193  |
| C | -6.797618  | 1.086214  | 5.040586  |
| H | -7.641101  | 1.196627  | 4.346335  |
| H | -6.645952  | 0.010067  | 5.221528  |
| H | -7.097790  | 1.547327  | 5.995135  |
| N | -9.530424  | -2.141221 | -1.899812 |
| C | -8.322094  | -1.601288 | -1.653230 |
| N | -7.668405  | -0.938391 | -2.619622 |
| N | -7.774727  | -1.732392 | -0.448327 |
| H | -8.352924  | -1.954216 | 0.351276  |
| C | -10.035614 | -3.234129 | -1.092953 |
| H | -10.660638 | -3.879811 | -1.725324 |
| H | -9.203862  | -3.835694 | -0.705986 |
| H | -10.652625 | -2.877620 | -0.250269 |
| C | -10.493074 | -1.498950 | -2.776765 |
| H | -10.127545 | -0.513958 | -3.086570 |
| H | -10.702826 | -2.106064 | -3.670691 |
| H | -11.434653 | -1.354669 | -2.225024 |
| C | -7.785665  | -1.300404 | -4.020490 |
| H | -8.279724  | -0.510803 | -4.607010 |
| H | -6.775722  | -1.454229 | -4.430217 |
| H | -8.346051  | -2.235363 | -4.130024 |
| C | -6.619134  | 0.011938  | -2.304470 |
| H | -6.628656  | 0.809311  | -3.059979 |
| H | -6.794788  | 0.465937  | -1.322917 |
| H | -5.630114  | -0.467612 | -2.300787 |
| H | -6.763939  | -1.628905 | -0.284389 |

Vibrational frequencies

|         |         |         |
|---------|---------|---------|
| 10.0484 | 12.4824 | 16.2961 |
| 18.2578 | 19.0548 | 21.0682 |
| 24.7642 | 26.5902 | 27.9425 |

|         |         |         |
|---------|---------|---------|
| 29.9617 | 31.5823 | 32.7370 |
| 36.4706 | 37.3471 | 38.5705 |
| 42.2114 | 44.5800 | 46.7188 |
| 47.7633 | 49.6464 | 51.6392 |
| 52.6771 | 58.0705 | 59.1118 |
| 62.2832 | 65.9676 | 66.9632 |
| 71.6748 | 74.6753 | 76.4882 |

### M3

|                                              |          |             |
|----------------------------------------------|----------|-------------|
| Zero-point correction=                       | 0.433579 |             |
| Thermal correction to Energy=                | 0.458480 |             |
| Thermal correction to Enthalpy=              | 0.459425 |             |
| Thermal correction to Gibbs Free Energy=     |          | 0.378226    |
| Sum of electronic and zero-point Energies=   |          | -980.873996 |
| Sum of electronic and thermal Energies=      |          | -980.849095 |
| Sum of electronic and thermal Enthalpies=    |          | -980.848151 |
| Sum of electronic and thermal Free Energies= |          | -980.929350 |

### Cartesian coordinates

|   |           |           |           |
|---|-----------|-----------|-----------|
| C | -2.076001 | -1.133032 | -0.124014 |
| C | -2.899702 | -2.410850 | -0.235248 |
| H | -3.491318 | -2.417565 | -1.161847 |
| H | -2.227485 | -3.282359 | -0.252132 |
| H | -3.578255 | -2.525923 | 0.621025  |
| C | -1.266626 | -1.135686 | 1.170534  |
| H | -0.520941 | -1.945231 | 1.142927  |
| H | -0.730296 | -0.186683 | 1.312443  |
| H | -1.911098 | -1.298523 | 2.043342  |
| N | -1.159163 | -1.149383 | -1.308888 |
| C | 0.010283  | -0.789139 | -1.320440 |
| C | 1.157969  | -0.241181 | -0.709771 |
| C | 2.233986  | -1.067668 | -0.303319 |
| C | 1.319333  | 1.167779  | -0.600999 |
| C | 3.421517  | -0.523230 | 0.187641  |
| C | 2.499303  | 1.714738  | -0.115689 |
| C | 3.550633  | 0.869105  | 0.272602  |
| H | 4.230644  | -1.176306 | 0.504332  |
| H | 2.640666  | 2.789638  | -0.015176 |
| O | 0.249052  | 1.889553  | -0.983552 |
| O | 1.999463  | -2.389500 | -0.410677 |
| O | 4.658104  | 1.488679  | 0.728683  |
| C | 3.008326  | -3.295918 | -0.041683 |
| H | 2.607946  | -4.300238 | -0.225036 |

|   |           |           |           |
|---|-----------|-----------|-----------|
| H | 3.920108  | -3.156893 | -0.646354 |
| H | 3.266638  | -3.202140 | 1.026465  |
| C | 0.306613  | 3.291138  | -0.895349 |
| H | 1.107618  | 3.704035  | -1.530933 |
| H | -0.661806 | 3.665724  | -1.248605 |
| H | 0.464961  | 3.624756  | 0.143891  |
| C | 5.752139  | 0.710915  | 1.141618  |
| H | 6.149496  | 0.094564  | 0.317158  |
| H | 6.530286  | 1.411668  | 1.468153  |
| H | 5.488589  | 0.051113  | 1.985866  |
| C | -2.879060 | 0.167776  | -0.344826 |
| H | -3.156333 | 0.179550  | -1.412815 |
| H | -2.148183 | 0.985021  | -0.224018 |
| C | -3.972694 | 0.435850  | 1.967302  |
| H | -3.884896 | -0.608859 | 2.299773  |
| H | -3.078805 | 0.980395  | 2.309270  |
| H | -4.846587 | 0.868226  | 2.480685  |
| C | -4.434022 | 2.010601  | 0.103814  |
| H | -4.557349 | 2.143553  | -0.982969 |
| H | -5.357108 | 2.358633  | 0.594054  |
| H | -3.608582 | 2.663011  | 0.430868  |
| C | -4.149832 | 0.542712  | 0.451716  |
| C | -5.367703 | -0.283283 | 0.023611  |
| H | -5.509232 | -0.243085 | -1.068108 |
| H | -5.283699 | -1.338825 | 0.313980  |
| H | -6.280553 | 0.114800  | 0.495353  |

Vibrational frequencies

|          |          |          |
|----------|----------|----------|
| 16.1095  | 25.3413  | 29.1953  |
| 45.3040  | 65.2035  | 84.3856  |
| 91.3944  | 113.2390 | 120.7853 |
| 133.8129 | 174.5269 | 188.5385 |
| 192.3265 | 210.0042 | 215.4240 |
| 241.0503 | 246.6775 | 251.8151 |
| 265.6885 | 275.8339 | 280.6973 |
| 291.2846 | 294.2291 | 302.0053 |
| 309.9580 | 313.1399 | 331.6524 |
| 343.0544 | 355.3141 | 368.4515 |

**TMG·H<sup>+</sup>+Ir<sup>II-</sup>**

|                                 |          |
|---------------------------------|----------|
| Zero-point correction=          | 0.910686 |
| Thermal correction to Energy=   | 0.981552 |
| Thermal correction to Enthalpy= | 0.982496 |

|                                              |              |
|----------------------------------------------|--------------|
| Thermal correction to Gibbs Free Energy=     | 0.794067     |
| Sum of electronic and zero-point Energies=   | -4238.913124 |
| Sum of electronic and thermal Energies=      | -4238.842259 |
| Sum of electronic and thermal Enthalpies=    | -4238.841315 |
| Sum of electronic and thermal Free Energies= | -4239.029743 |

Cartesian coordinates

|    |           |           |           |
|----|-----------|-----------|-----------|
| Ir | 2.140966  | -0.771433 | -0.294805 |
| C  | 3.254954  | 3.753992  | -1.478004 |
| C  | 2.013647  | 3.237233  | -1.846417 |
| C  | 1.704589  | 1.935030  | -1.493480 |
| C  | 3.798739  | 1.619491  | -0.492390 |
| C  | 4.147271  | 2.943842  | -0.797852 |
| H  | 3.529341  | 4.783319  | -1.720916 |
| H  | 0.735031  | 1.497093  | -1.737467 |
| H  | 5.125023  | 3.325134  | -0.509357 |
| C  | 4.819159  | -1.693570 | 0.880768  |
| C  | 4.052336  | -0.672519 | 0.304594  |
| C  | 4.638764  | 0.618398  | 0.159777  |
| C  | 5.947006  | 0.827504  | 0.611277  |
| C  | 6.700243  | -0.174728 | 1.196474  |
| C  | 6.108946  | -1.429016 | 1.312421  |
| H  | 4.418663  | -2.702647 | 1.008555  |
| H  | 7.716794  | 0.011077  | 1.541262  |
| N  | 2.564787  | 1.153721  | -0.843231 |
| F  | 6.520200  | 2.028972  | 0.499974  |
| F  | 6.821573  | -2.414669 | 1.863029  |
| C  | 1.052246  | 4.056931  | -2.670600 |
| F  | -0.153603 | 3.501324  | -2.741282 |
| F  | 1.504182  | 4.185276  | -3.924483 |
| F  | 0.920851  | 5.291837  | -2.179331 |
| C  | -2.507233 | 0.357120  | -1.418401 |
| C  | -1.741444 | -0.441216 | -2.328468 |
| C  | -0.482009 | -0.850850 | -1.966674 |
| C  | -0.639409 | 0.156980  | 0.149133  |
| C  | -1.942392 | 0.620840  | -0.191074 |
| H  | -2.122724 | -0.708499 | -3.317123 |
| H  | 0.141468  | -1.423698 | -2.658155 |
| C  | 0.073293  | 1.329760  | 3.662303  |
| C  | -0.603390 | 1.102953  | 2.484089  |
| C  | 0.009740  | 0.436610  | 1.386101  |
| C  | 1.986038  | 0.251313  | 2.645453  |
| C  | 1.417840  | 0.872160  | 3.738498  |



|   |           |           |           |
|---|-----------|-----------|-----------|
| H | -1.623340 | 1.460160  | 2.354438  |
| H | 3.018506  | -0.094782 | 2.665921  |
| H | 2.023972  | 1.016385  | 4.633087  |
| N | 0.086494  | -0.557738 | -0.786186 |
| N | 1.323151  | 0.024258  | 1.500319  |
| C | 2.959072  | -3.753655 | -3.186342 |
| C | 3.416428  | -3.115724 | -4.330422 |
| C | 3.515030  | -1.726976 | -4.294290 |
| C | 3.179163  | -0.983053 | -3.168198 |
| C | 2.722729  | -1.625109 | -2.015789 |
| C | 2.612248  | -3.047365 | -2.023014 |
| H | 3.674626  | -3.688152 | -5.221600 |
| H | 3.290367  | 0.102272  | -3.220659 |
| C | 1.502965  | -5.424061 | 0.724670  |
| C | 1.965896  | -5.010462 | -0.514668 |
| C | 2.138272  | -3.643200 | -0.783267 |
| C | 1.407472  | -3.123882 | 1.386563  |
| C | 1.212715  | -4.458997 | 1.696163  |
| H | 1.374970  | -6.486952 | 0.936100  |
| H | 2.193835  | -5.742146 | -1.285523 |
| H | 1.200706  | -2.328365 | 2.105158  |
| F | 3.947527  | -1.105272 | -5.388803 |
| F | 2.863473  | -5.087041 | -3.226126 |
| N | 1.855788  | -2.728400 | 0.188372  |
| C | 0.696175  | -4.868148 | 3.041441  |
| F | 1.498459  | -5.770608 | 3.620097  |
| F | -0.515562 | -5.431647 | 2.949530  |
| F | 0.588895  | -3.829601 | 3.871667  |
| C | -0.545127 | 2.074518  | 4.835701  |
| C | -2.012418 | 2.423862  | 4.593794  |
| H | -2.624595 | 1.517156  | 4.447766  |
| H | -2.413889 | 2.956475  | 5.472672  |
| H | -2.141280 | 3.070180  | 3.714457  |
| C | -0.438973 | 1.206357  | 6.099489  |
| H | -0.871737 | 1.740887  | 6.963628  |
| H | -0.993706 | 0.265055  | 5.970096  |
| H | 0.599363  | 0.958585  | 6.351004  |
| C | 0.238943  | 3.381569  | 5.043133  |
| H | 1.300297  | 3.188222  | 5.245947  |
| H | 0.156318  | 4.010851  | 4.141806  |
| H | -0.170952 | 3.943571  | 5.898923  |
| H | -2.454711 | 1.265563  | 0.517860  |
| C | -3.835162 | 0.958694  | -1.853378 |

|   |            |           |           |
|---|------------|-----------|-----------|
| C | -3.533048  | 2.048476  | -2.884796 |
| H | -2.989714  | 1.647367  | -3.756680 |
| H | -4.469448  | 2.506402  | -3.252938 |
| H | -2.919120  | 2.843683  | -2.432530 |
| C | -4.722375  | -0.123310 | -2.485539 |
| H | -4.933873  | -0.936725 | -1.773340 |
| H | -5.685339  | 0.319147  | -2.801041 |
| H | -4.266690  | -0.573646 | -3.384326 |
| C | -4.591485  | 1.582170  | -0.683448 |
| H | -4.785701  | 0.845074  | 0.108957  |
| H | -4.032215  | 2.420504  | -0.240200 |
| H | -5.560609  | 1.967325  | -1.028720 |
| P | -1.641961  | 4.647082  | 0.702166  |
| F | -0.585797  | 3.535335  | 0.164939  |
| F | -2.484525  | 4.529769  | -0.684612 |
| F | -2.569872  | 3.456979  | 1.349067  |
| F | -2.713288  | 5.745592  | 1.257312  |
| F | -0.817271  | 4.755743  | 2.107118  |
| F | -0.736371  | 5.837908  | 0.079452  |
| N | -10.155558 | -2.939797 | -0.659097 |
| C | -9.022397  | -2.457628 | -0.126495 |
| N | -8.590118  | -1.224217 | -0.427728 |
| N | -8.316636  | -3.210491 | 0.721580  |
| H | -8.732496  | -3.990202 | 1.209982  |
| C | -10.395499 | -4.372283 | -0.737593 |
| H | -10.966264 | -4.581843 | -1.655035 |
| H | -9.448780  | -4.916252 | -0.783598 |
| H | -10.983701 | -4.736774 | 0.124145  |
| C | -11.289369 | -2.089463 | -0.957535 |
| H | -11.120100 | -1.074561 | -0.582079 |
| H | -11.496055 | -2.046068 | -2.038404 |
| H | -12.180607 | -2.495759 | -0.453022 |
| C | -8.798909  | -0.635203 | -1.743967 |
| H | -9.453879  | 0.248658  | -1.691248 |
| H | -7.816780  | -0.324214 | -2.144200 |
| H | -9.225661  | -1.365991 | -2.429925 |
| C | -7.657167  | -0.525459 | 0.442778  |
| H | -7.828886  | 0.552674  | 0.334561  |
| H | -7.839568  | -0.801439 | 1.494444  |
| H | -6.607400  | -0.735762 | 0.178308  |
| H | -7.344269  | -3.004219 | 0.915202  |

Vibrational frequencies

|         |         |         |
|---------|---------|---------|
| 3.5987  | 10.7763 | 14.8427 |
| 16.4524 | 18.7208 | 20.3691 |
| 21.8271 | 25.1969 | 26.6793 |
| 26.9808 | 29.3156 | 33.3937 |
| 34.7693 | 35.2852 | 37.8476 |
| 42.9042 | 44.7660 | 50.1367 |
| 54.8270 | 57.6248 | 66.7004 |
| 68.9784 | 70.1463 | 72.6262 |
| 74.8369 | 78.8918 | 81.6061 |
| 86.3938 | 87.7095 | 95.3849 |

## TS2

|                                              |          |             |
|----------------------------------------------|----------|-------------|
| Zero-point correction=                       | 0.430024 |             |
| Thermal correction to Energy=                | 0.455514 |             |
| Thermal correction to Enthalpy=              | 0.456458 |             |
| Thermal correction to Gibbs Free Energy=     |          | 0.372354    |
| Sum of electronic and zero-point Energies=   |          | -980.861503 |
| Sum of electronic and thermal Energies=      |          | -980.836014 |
| Sum of electronic and thermal Enthalpies=    |          | -980.835069 |
| Sum of electronic and thermal Free Energies= |          | -980.919173 |

## Cartesian coordinates

|   |           |           |           |
|---|-----------|-----------|-----------|
| C | 2.378837  | 1.221296  | -0.076223 |
| C | 3.152833  | 2.434811  | -0.491608 |
| H | 3.721748  | 2.253644  | -1.415155 |
| H | 2.471457  | 3.282408  | -0.666813 |
| H | 3.865334  | 2.747742  | 0.291687  |
| C | 1.478498  | 1.420139  | 1.105261  |
| H | 0.788133  | 2.261766  | 0.932479  |
| H | 0.877044  | 0.522124  | 1.311691  |
| H | 2.053097  | 1.652166  | 2.017902  |
| N | 1.124118  | 1.128965  | -1.571345 |
| C | 0.029490  | 0.737028  | -1.317039 |
| C | -1.168759 | 0.233190  | -0.792211 |
| C | -2.231551 | 1.099356  | -0.436057 |
| C | -1.354136 | -1.168171 | -0.634017 |
| C | -3.437552 | 0.594307  | 0.051314  |
| C | -2.552848 | -1.672786 | -0.150046 |
| C | -3.593081 | -0.791579 | 0.186715  |
| H | -4.242051 | 1.272629  | 0.323359  |
| H | -2.719135 | -2.740170 | -0.015151 |
| O | -0.292598 | -1.920116 | -0.969514 |
| O | -1.971038 | 2.408545  | -0.590012 |

|   |           |           |           |
|---|-----------|-----------|-----------|
| O | -4.719090 | -1.371120 | 0.643921  |
| C | -2.963771 | 3.348813  | -0.260584 |
| H | -2.537581 | 4.337259  | -0.469254 |
| H | -3.870476 | 3.211303  | -0.872792 |
| H | -3.236098 | 3.292330  | 0.806482  |
| C | -0.373418 | -3.316851 | -0.825728 |
| H | -1.168650 | -3.742429 | -1.459870 |
| H | 0.595638  | -3.718715 | -1.145099 |
| H | -0.555842 | -3.604814 | 0.222974  |
| C | -5.805665 | -0.558451 | 1.009616  |
| H | -6.177403 | 0.033309  | 0.155993  |
| H | -6.601402 | -1.232948 | 1.348348  |
| H | -5.542565 | 0.126736  | 1.833266  |
| C | 2.997465  | -0.140489 | -0.271869 |
| H | 3.286839  | -0.222743 | -1.334657 |
| H | 2.195969  | -0.884404 | -0.119216 |
| C | 3.949299  | -0.500962 | 2.070021  |
| H | 3.870876  | 0.543853  | 2.404892  |
| H | 3.015240  | -1.016700 | 2.344216  |
| H | 4.770757  | -0.967188 | 2.637656  |
| C | 4.464668  | -2.066622 | 0.206017  |
| H | 4.654177  | -2.182387 | -0.873190 |
| H | 5.337653  | -2.464498 | 0.747718  |
| H | 3.592917  | -2.690009 | 0.462546  |
| C | 4.218186  | -0.597511 | 0.567619  |
| C | 5.475742  | 0.203303  | 0.222070  |
| H | 5.676775  | 0.179640  | -0.860892 |
| H | 5.392111  | 1.255633  | 0.526958  |
| H | 6.353606  | -0.220068 | 0.736427  |

#### Vibrational frequencies

|           |          |          |
|-----------|----------|----------|
| -501.3947 | 8.5060   | 15.6234  |
| 23.5534   | 34.0774  | 60.5036  |
| 82.9517   | 85.6023  | 110.2217 |
| 119.3498  | 127.7163 | 173.8591 |
| 178.0428  | 191.0223 | 198.1913 |
| 200.3404  | 211.4279 | 221.5196 |
| 224.5361  | 244.5173 | 259.8413 |
| 264.1637  | 273.8473 | 275.6732 |
| 288.4834  | 291.5929 | 300.0680 |
| 314.7284  | 322.0365 | 330.0699 |

**aromatic nitrile**

|                                              |             |             |
|----------------------------------------------|-------------|-------------|
| Zero-point correction=                       | 0.198599    |             |
| Thermal correction to Energy=                | 0.212336    |             |
| Thermal correction to Enthalpy=              | 0.213280    |             |
| Thermal correction to Gibbs Free Energy=     |             | 0.158493    |
| Sum of electronic and zero-point Energies=   |             | -666.654348 |
| Sum of electronic and thermal Energies=      | -666.640611 |             |
| Sum of electronic and thermal Enthalpies=    |             | -666.639667 |
| Sum of electronic and thermal Free Energies= |             | -666.694455 |

## Cartesian coordinates

|   |           |           |           |
|---|-----------|-----------|-----------|
| C | -0.045628 | -1.621261 | -0.000029 |
| C | 1.242084  | -1.063642 | -0.000061 |
| C | 1.438540  | 0.322787  | -0.000057 |
| C | 0.322879  | 1.163389  | -0.000016 |
| C | -0.981368 | 0.624023  | 0.000018  |
| C | -1.153133 | -0.782369 | 0.000010  |
| H | -0.136582 | -2.705511 | -0.000039 |
| H | 2.440389  | 0.742622  | -0.000089 |
| O | -2.419186 | -1.208500 | 0.000039  |
| O | 0.398911  | 2.496724  | -0.000012 |
| O | 2.247978  | -1.945951 | -0.000095 |
| C | 3.578361  | -1.482328 | -0.000167 |
| H | 3.796953  | -0.882767 | 0.898611  |
| H | 4.217197  | -2.373237 | -0.000215 |
| H | 3.796848  | -0.882745 | -0.898955 |
| C | 1.663123  | 3.119941  | 0.000073  |
| H | 1.474313  | 4.199585  | 0.000168  |
| H | 2.242103  | 2.854141  | 0.899293  |
| H | 2.242141  | 2.854309  | -0.899174 |
| C | -2.678003 | -2.593987 | 0.000105  |
| H | -2.264237 | -3.079123 | 0.898883  |
| H | -3.768512 | -2.704458 | 0.000179  |
| H | -2.264353 | -3.079187 | -0.898691 |
| C | -2.111075 | 1.482769  | 0.000065  |
| N | -3.036081 | 2.186038  | 0.000131  |

## Vibrational frequencies

|          |          |          |
|----------|----------|----------|
| 62.4860  | 81.6599  | 110.7945 |
| 123.8637 | 134.7839 | 177.8034 |
| 190.5705 | 192.5831 | 207.7178 |
| 244.3907 | 266.0899 | 284.2926 |
| 295.1653 | 309.1805 | 372.2828 |

|          |          |           |
|----------|----------|-----------|
| 401.7704 | 453.6232 | 489.0776  |
| 552.8936 | 559.4277 | 611.3003  |
| 635.5397 | 669.7695 | 723.2386  |
| 751.1545 | 762.0696 | 817.8589  |
| 833.4206 | 984.1790 | 1007.3652 |

#### M4

|                                              |          |             |
|----------------------------------------------|----------|-------------|
| Zero-point correction=                       | 0.229587 |             |
| Thermal correction to Energy=                | 0.240913 |             |
| Thermal correction to Enthalpy=              | 0.241857 |             |
| Thermal correction to Gibbs Free Energy=     |          | 0.192990    |
| Sum of electronic and zero-point Energies=   |          | -314.224565 |
| Sum of electronic and thermal Energies=      |          | -314.213239 |
| Sum of electronic and thermal Enthalpies=    |          | -314.212294 |
| Sum of electronic and thermal Free Energies= |          | -314.261161 |

#### Cartesian coordinates

|   |           |           |           |
|---|-----------|-----------|-----------|
| C | -1.462012 | -0.000057 | -0.318256 |
| C | -2.146336 | -1.274056 | 0.043005  |
| H | -2.218448 | -1.415158 | 1.140400  |
| H | -3.189136 | -1.291009 | -0.326694 |
| H | -1.627607 | -2.154599 | -0.364079 |
| C | -2.145466 | 1.274420  | 0.042935  |
| H | -1.628795 | 2.154280  | -0.368294 |
| H | -3.189806 | 1.289944  | -0.322302 |
| H | -2.212875 | 1.418197  | 1.140317  |
| C | 1.123098  | -0.000096 | 0.013788  |
| C | -0.105347 | -0.000560 | -0.941247 |
| H | -0.004931 | -0.887010 | -1.594521 |
| H | -0.004714 | 0.885112  | -1.595544 |
| C | 1.112184  | 1.248602  | 0.896012  |
| H | 0.229853  | 1.268496  | 1.553464  |
| H | 2.007776  | 1.278918  | 1.537392  |
| H | 1.102533  | 2.167572  | 0.287939  |
| C | 2.387903  | -0.001371 | -0.846334 |
| H | 3.292924  | -0.000989 | -0.217851 |
| H | 2.426888  | -0.892366 | -1.493541 |
| H | 2.427427  | 0.888260  | -1.495384 |
| C | 1.111312  | -1.247012 | 0.898504  |
| H | 1.101292  | -2.167208 | 0.292291  |
| H | 2.006763  | -1.276538 | 1.540120  |
| H | 0.228837  | -1.265126 | 1.555837  |

### Vibrational frequencies

|           |           |           |
|-----------|-----------|-----------|
| 46.5769   | 91.2524   | 108.0671  |
| 139.6203  | 179.8181  | 234.1683  |
| 273.7211  | 276.4738  | 298.1946  |
| 302.2859  | 311.7879  | 377.4272  |
| 391.9406  | 416.1766  | 441.8999  |
| 511.9078  | 740.8700  | 809.6392  |
| 896.0215  | 913.8664  | 932.9771  |
| 944.1751  | 944.6731  | 948.5219  |
| 963.2633  | 1004.5806 | 1017.9204 |
| 1037.1352 | 1038.0047 | 1147.0229 |

### R2

|                                              |          |              |
|----------------------------------------------|----------|--------------|
| Zero-point correction=                       | 0.367040 |              |
| Thermal correction to Energy=                | 0.391172 |              |
| Thermal correction to Enthalpy=              | 0.392116 |              |
| Thermal correction to Gibbs Free Energy=     |          | 0.312708     |
| Sum of electronic and zero-point Energies=   |          | -1051.215254 |
| Sum of electronic and thermal Energies=      |          | -1051.191122 |
| Sum of electronic and thermal Enthalpies=    |          | -1051.190178 |
| Sum of electronic and thermal Free Energies= |          | -1051.269586 |

### Cartesian coordinates

|   |           |           |           |
|---|-----------|-----------|-----------|
| C | -0.654165 | -1.407785 | -0.730861 |
| N | 0.265989  | -0.384488 | -0.373745 |
| C | -0.559357 | -2.089857 | -1.873487 |
| H | 0.220983  | -1.861161 | -2.601778 |
| H | -1.251724 | -2.905297 | -2.082050 |
| C | -1.680515 | -1.700641 | 0.312575  |
| O | -1.627515 | -1.264025 | 1.437521  |
| O | -2.653051 | -2.484347 | -0.135479 |
| C | -3.664125 | -2.830383 | 0.800886  |
| H | -4.195011 | -1.930585 | 1.143995  |
| H | -4.354305 | -3.497412 | 0.273454  |
| H | -3.230302 | -3.341969 | 1.671570  |
| C | 1.609990  | -0.754667 | -0.171839 |
| C | -0.251710 | 0.875281  | -0.014913 |
| O | 1.936800  | -1.904856 | -0.015540 |
| O | 0.318242  | 1.696352  | 0.652152  |
| O | 2.400462  | 0.293336  | -0.233970 |
| O | -1.468387 | 0.979625  | -0.531985 |
| C | 3.812852  | 0.220383  | 0.133824  |
| C | 3.941738  | -0.278058 | 1.565926  |

|   |           |           |           |
|---|-----------|-----------|-----------|
| H | 3.626496  | -1.325094 | 1.656872  |
| H | 4.990633  | -0.200019 | 1.886035  |
| H | 3.328202  | 0.339958  | 2.238137  |
| C | 4.556561  | -0.659580 | -0.860243 |
| H | 5.634448  | -0.623829 | -0.644707 |
| H | 4.217357  | -1.700857 | -0.797115 |
| H | 4.399995  | -0.293257 | -1.885853 |
| C | -2.381242 | 2.058751  | -0.160927 |
| C | -2.581123 | 2.076394  | 1.347920  |
| H | -1.665985 | 2.385300  | 1.868064  |
| H | -3.383490 | 2.785677  | 1.597237  |
| H | -2.869547 | 1.077566  | 1.705295  |
| C | -3.665679 | 1.664475  | -0.872036 |
| H | -4.445436 | 2.416483  | -0.686752 |
| H | -3.499168 | 1.591795  | -1.956576 |
| H | -4.024866 | 0.690278  | -0.508625 |
| C | -1.842350 | 3.378534  | -0.691811 |
| H | -0.897358 | 3.641438  | -0.200222 |
| H | -1.676566 | 3.316134  | -1.777589 |
| H | -2.574219 | 4.176837  | -0.500600 |
| C | 4.261140  | 1.668267  | 0.023295  |
| H | 3.678462  | 2.302608  | 0.706254  |
| H | 5.325866  | 1.753473  | 0.282291  |
| H | 4.119107  | 2.037985  | -1.002561 |

#### Vibrational frequencies

|          |          |          |
|----------|----------|----------|
| 18.4884  | 24.9622  | 41.9683  |
| 44.9086  | 57.5622  | 80.5227  |
| 95.7617  | 111.5189 | 117.0321 |
| 124.4411 | 131.9135 | 148.0094 |
| 158.8083 | 201.0405 | 213.1624 |
| 217.3229 | 217.5413 | 239.8892 |
| 247.1586 | 261.5444 | 263.6664 |
| 277.2321 | 282.4754 | 310.3550 |
| 325.3566 | 336.2287 | 352.3664 |
| 356.7500 | 357.2099 | 397.3743 |

#### TS3

|                                            |          |              |
|--------------------------------------------|----------|--------------|
| Zero-point correction=                     | 0.600078 |              |
| Thermal correction to Energy=              | 0.634833 |              |
| Thermal correction to Enthalpy=            | 0.635777 |              |
| Thermal correction to Gibbs Free Energy=   |          | 0.533725     |
| Sum of electronic and zero-point Energies= |          | -1365.379307 |



|                                              |              |
|----------------------------------------------|--------------|
| Sum of electronic and thermal Energies=      | -1365.344552 |
| Sum of electronic and thermal Enthalpies=    | -1365.343608 |
| Sum of electronic and thermal Free Energies= | -1365.445660 |

Cartesian coordinates

|   |           |           |           |
|---|-----------|-----------|-----------|
| C | -2.745551 | 1.106844  | -0.838112 |
| H | -1.903819 | 1.807669  | -0.721622 |
| H | -3.281645 | 1.368080  | -1.782512 |
| H | -3.437697 | 1.261329  | -0.004722 |
| C | -1.143473 | -0.453596 | -1.968026 |
| H | -0.338518 | 0.282677  | -1.820626 |
| H | -0.702800 | -1.463939 | -1.971697 |
| H | -1.586863 | -0.281360 | -2.976424 |
| C | -1.233646 | -0.613960 | 0.759348  |
| H | -2.084098 | -0.451323 | 1.438911  |
| H | -1.026403 | -1.675794 | 0.513518  |
| C | -0.114995 | 0.201382  | 1.022012  |
| C | -0.166771 | 1.421688  | 1.828755  |
| O | 0.809733  | 2.070674  | 2.169075  |
| O | -1.414390 | 1.777742  | 2.160274  |
| C | -1.546725 | 2.965094  | 2.922144  |
| H | -1.164633 | 3.830501  | 2.365352  |
| H | -2.619825 | 3.088316  | 3.114956  |
| H | -0.999878 | 2.886944  | 3.875013  |
| N | 1.174315  | -0.100697 | 0.512791  |
| C | 1.913817  | 0.900650  | -0.150259 |
| C | 1.745383  | -1.360818 | 0.773615  |
| O | 3.113798  | 0.940728  | -0.216300 |
| O | 1.406168  | -2.042292 | 1.712345  |
| O | 1.065590  | 1.770474  | -0.682809 |
| O | 2.612617  | -1.687102 | -0.162238 |
| C | 1.510745  | 3.025023  | -1.277704 |
| C | 3.486362  | -2.849867 | -0.056528 |
| C | 2.650682  | -4.122219 | -0.107864 |
| H | 3.317898  | -4.995693 | -0.147950 |
| H | 2.001190  | -4.204071 | 0.768955  |
| H | 2.023119  | -4.129066 | -1.016580 |
| C | 4.320102  | -2.751825 | 1.209725  |
| H | 3.698452  | -2.846776 | 2.108871  |
| H | 5.070623  | -3.561919 | 1.215809  |
| H | 4.849927  | -1.788294 | 1.241318  |
| C | 4.361895  | -2.724249 | -1.292558 |
| H | 5.074768  | -3.559617 | -1.336412 |

|   |           |           |           |
|---|-----------|-----------|-----------|
| H | 3.748984  | -2.745955 | -2.206894 |
| H | 4.923841  | -1.779785 | -1.268788 |
| C | 2.340906  | 3.820868  | -0.277769 |
| H | 3.307617  | 3.338344  | -0.089638 |
| H | 2.522263  | 4.828292  | -0.680205 |
| H | 1.802778  | 3.905615  | 0.674600  |
| C | 2.271610  | 2.727592  | -2.559597 |
| H | 2.533453  | 3.666288  | -3.063001 |
| H | 3.192453  | 2.173004  | -2.346347 |
| H | 1.643886  | 2.135143  | -3.243117 |
| C | 0.201085  | 3.746203  | -1.567546 |
| H | 0.399025  | 4.715820  | -2.045572 |
| H | -0.426634 | 3.144014  | -2.246757 |
| H | -0.356658 | 3.914007  | -0.637105 |
| C | -2.233695 | -0.305791 | -0.929143 |
| C | -3.249615 | -1.434828 | -1.082225 |
| H | -3.438844 | -1.493499 | -2.183541 |
| H | -2.721965 | -2.383432 | -0.849147 |
| C | -4.633709 | -1.478072 | -0.396311 |
| C | -5.209670 | -2.881124 | -0.653357 |
| H | -6.206956 | -2.980124 | -0.199095 |
| H | -5.303630 | -3.081507 | -1.733638 |
| H | -4.563278 | -3.665015 | -0.220353 |
| C | -4.528669 | -1.279483 | 1.120754  |
| H | -4.172210 | -0.278634 | 1.386473  |
| H | -5.516256 | -1.411767 | 1.589413  |
| H | -3.842899 | -2.016759 | 1.571456  |
| C | -5.617094 | -0.468671 | -0.991299 |
| H | -5.332239 | 0.575791  | -0.790208 |
| H | -5.702006 | -0.589682 | -2.079937 |
| H | -6.622709 | -0.619788 | -0.563394 |

Vibrational frequencies

|           |          |          |
|-----------|----------|----------|
| -398.8832 | 16.8027  | 23.9008  |
| 32.5068   | 40.9012  | 44.1574  |
| 49.3599   | 54.5667  | 60.7522  |
| 81.0903   | 91.9793  | 98.7372  |
| 107.9645  | 115.2435 | 131.5955 |
| 141.3480  | 155.3782 | 161.3719 |
| 173.8832  | 179.6710 | 191.8781 |
| 209.9736  | 214.2130 | 219.9243 |
| 226.3934  | 230.0926 | 244.3072 |
| 248.7164  | 255.9192 | 275.4736 |

**M5**

|                                              |              |              |
|----------------------------------------------|--------------|--------------|
| Zero-point correction=                       | 0.604179     |              |
| Thermal correction to Energy=                | 0.639006     |              |
| Thermal correction to Enthalpy=              | 0.639950     |              |
| Thermal correction to Gibbs Free Energy=     |              | 0.537670     |
| Sum of electronic and zero-point Energies=   |              | -1365.488509 |
| Sum of electronic and thermal Energies=      | -1365.453683 |              |
| Sum of electronic and thermal Enthalpies=    |              | -1365.452738 |
| Sum of electronic and thermal Free Energies= |              | -1365.555019 |

## Cartesian coordinates

|   |           |           |           |
|---|-----------|-----------|-----------|
| C | -2.131085 | 0.753547  | -1.270703 |
| H | -1.182950 | 1.311062  | -1.284945 |
| H | -2.540069 | 0.757049  | -2.292447 |
| H | -2.824271 | 1.299294  | -0.616600 |
| C | -0.798041 | -1.296615 | -1.681166 |
| H | 0.139470  | -0.724841 | -1.633916 |
| H | -0.582033 | -2.335478 | -1.383202 |
| H | -1.125399 | -1.310026 | -2.732629 |
| C | -1.386041 | -0.686414 | 0.686709  |
| H | -2.215038 | -0.423618 | 1.348378  |
| H | -1.087107 | -1.715537 | 0.936957  |
| C | -0.270185 | 0.245041  | 0.992524  |
| C | -0.467822 | 1.526902  | 1.658657  |
| O | 0.434474  | 2.250541  | 2.037851  |
| O | -1.761931 | 1.828882  | 1.821331  |
| C | -2.040326 | 3.060684  | 2.464185  |
| H | -1.648989 | 3.903802  | 1.875807  |
| H | -3.131360 | 3.128052  | 2.538140  |
| H | -1.589399 | 3.090897  | 3.466465  |
| N | 1.048279  | -0.056223 | 0.647431  |
| C | 1.919047  | 0.944964  | 0.129556  |
| C | 1.541398  | -1.362501 | 0.848598  |
| O | 3.094346  | 0.982434  | 0.372103  |
| O | 1.100788  | -2.095767 | 1.698042  |
| O | 1.234627  | 1.749907  | -0.660316 |
| O | 2.464389  | -1.639255 | -0.047048 |
| C | 1.826052  | 2.960880  | -1.232890 |
| C | 3.293784  | -2.840990 | 0.032714  |
| C | 2.425009  | -4.070927 | -0.184756 |
| H | 3.064700  | -4.963048 | -0.250653 |
| H | 1.714972  | -4.206142 | 0.640449  |
| H | 1.864759  | -3.979424 | -1.127297 |

|   |           |           |           |
|---|-----------|-----------|-----------|
| C | 4.022771  | -2.866414 | 1.367810  |
| H | 3.325259  | -3.006441 | 2.203359  |
| H | 4.744116  | -3.696069 | 1.372374  |
| H | 4.574695  | -1.926582 | 1.516138  |
| C | 4.269217  | -2.649509 | -1.116440 |
| H | 4.963375  | -3.499991 | -1.165439 |
| H | 3.729733  | -2.581634 | -2.072331 |
| H | 4.849984  | -1.726541 | -0.976480 |
| C | 2.380592  | 3.850423  | -0.129869 |
| H | 3.262291  | 3.401632  | 0.343694  |
| H | 2.669465  | 4.818556  | -0.563932 |
| H | 1.616228  | 4.019737  | 0.640975  |
| C | 2.885971  | 2.557278  | -2.246737 |
| H | 3.273014  | 3.455447  | -2.749537 |
| H | 3.722185  | 2.041326  | -1.758071 |
| H | 2.453216  | 1.894586  | -3.010994 |
| C | 0.640861  | 3.624470  | -1.914246 |
| H | 0.964412  | 4.551840  | -2.407315 |
| H | 0.206186  | 2.958546  | -2.673601 |
| H | -0.137277 | 3.872408  | -1.177683 |
| C | -1.884147 | -0.677172 | -0.792243 |
| C | -3.122029 | -1.599237 | -0.903000 |
| H | -3.208579 | -1.892073 | -1.964303 |
| H | -2.858866 | -2.530359 | -0.369789 |
| C | -4.552861 | -1.201176 | -0.459834 |
| C | -5.376541 | -2.496310 | -0.493224 |
| H | -6.429129 | -2.298282 | -0.235333 |
| H | -5.355350 | -2.954567 | -1.495201 |
| H | -4.985084 | -3.235634 | 0.223635  |
| C | -4.632294 | -0.624402 | 0.956029  |
| H | -4.206343 | -1.316422 | 1.699611  |
| H | -4.108906 | 0.339034  | 1.045431  |
| H | -5.685700 | -0.453135 | 1.230636  |
| C | -5.203283 | -0.216815 | -1.439728 |
| H | -4.740018 | 0.777373  | -1.407757 |
| H | -5.137205 | -0.588154 | -2.474980 |
| H | -6.270771 | -0.091268 | -1.197023 |

Vibrational frequencies

|         |          |          |
|---------|----------|----------|
| 20.4911 | 25.8156  | 26.8122  |
| 39.5681 | 41.0859  | 48.2296  |
| 50.7812 | 58.3119  | 63.7669  |
| 97.3094 | 101.0222 | 108.9390 |

|          |          |          |
|----------|----------|----------|
| 119.8845 | 127.2863 | 147.7295 |
| 150.6051 | 162.9048 | 176.6113 |
| 184.4215 | 203.8122 | 209.8787 |
| 214.2828 | 216.2665 | 226.6691 |
| 240.1913 | 248.7037 | 253.6610 |
| 259.1402 | 263.1521 | 274.3798 |

#### TS4

|                                              |          |              |
|----------------------------------------------|----------|--------------|
| Zero-point correction=                       | 0.805273 |              |
| Thermal correction to Energy=                | 0.850582 |              |
| Thermal correction to Enthalpy=              | 0.851526 |              |
| Thermal correction to Gibbs Free Energy=     |          | 0.727807     |
| Sum of electronic and zero-point Energies=   |          | -1727.651406 |
| Sum of electronic and thermal Energies=      |          | -1727.606098 |
| Sum of electronic and thermal Enthalpies=    |          | -1727.605153 |
| Sum of electronic and thermal Free Energies= |          | -1727.728872 |

#### Cartesian coordinates

|   |           |           |           |
|---|-----------|-----------|-----------|
| C | 2.785571  | -0.586385 | 1.354897  |
| H | 1.820615  | -0.611407 | 1.880522  |
| H | 3.452743  | -1.293465 | 1.870927  |
| H | 3.208112  | 0.420393  | 1.459369  |
| C | 1.955000  | -2.387852 | -0.136512 |
| H | 0.994009  | -2.403097 | 0.393730  |
| H | 1.788461  | -2.726357 | -1.171760 |
| H | 2.611576  | -3.122702 | 0.354859  |
| C | 1.717270  | 0.001880  | -0.891332 |
| H | 2.261654  | 0.938352  | -1.047511 |
| H | 1.537081  | -0.418729 | -1.889853 |
| C | 0.359508  | 0.419132  | -0.329089 |
| C | 0.360443  | 1.405151  | 0.816430  |
| O | -0.564126 | 1.553003  | 1.579470  |
| O | 1.439094  | 2.173134  | 0.814382  |
| C | 1.555919  | 3.115715  | 1.878300  |
| H | 1.678058  | 2.585989  | 2.833284  |
| H | 2.447975  | 3.710558  | 1.657839  |
| H | 0.665694  | 3.755618  | 1.934104  |
| N | -0.642435 | -0.596731 | -0.154216 |
| C | -1.341295 | -0.859148 | 1.072695  |
| C | -1.004156 | -1.331293 | -1.286037 |
| O | -2.540338 | -0.817249 | 1.142920  |
| O | -0.690508 | -0.996844 | -2.403663 |
| O | -0.495835 | -1.206186 | 2.012547  |

|   |           |           |           |
|---|-----------|-----------|-----------|
| O | -1.669511 | -2.411570 | -0.932330 |
| C | -0.943483 | -1.550201 | 3.372257  |
| C | -2.208775 | -3.360067 | -1.909419 |
| C | -1.058720 | -4.003005 | -2.669727 |
| H | -1.450239 | -4.802350 | -3.315234 |
| H | -0.536600 | -3.269750 | -3.297147 |
| H | -0.339749 | -4.450350 | -1.967440 |
| C | -3.191621 | -2.650744 | -2.828679 |
| H | -2.687156 | -1.903806 | -3.454374 |
| H | -3.668133 | -3.391520 | -3.486693 |
| H | -3.981490 | -2.158937 | -2.241672 |
| C | -2.919237 | -4.373257 | -1.028559 |
| H | -3.370766 | -5.158648 | -1.650477 |
| H | -2.209881 | -4.842021 | -0.331215 |
| H | -3.713273 | -3.885333 | -0.445123 |
| C | -1.682280 | -0.373968 | 3.990981  |
| H | -2.636905 | -0.186649 | 3.484541  |
| H | -1.884273 | -0.599266 | 5.048026  |
| H | -1.068827 | 0.535619  | 3.935264  |
| C | -1.796356 | -2.807180 | 3.297026  |
| H | -2.047311 | -3.136259 | 4.315592  |
| H | -2.728534 | -2.622826 | 2.748562  |
| H | -1.242384 | -3.617096 | 2.799727  |
| C | 0.360860  | -1.817621 | 4.102537  |
| H | 0.148481  | -2.134417 | 5.133096  |
| H | 0.930333  | -2.614049 | 3.602289  |
| H | 0.981652  | -0.910998 | 4.139695  |
| C | 2.604156  | -0.996452 | -0.105194 |
| C | 3.945257  | -1.133347 | -0.873507 |
| H | 4.388642  | -2.096315 | -0.566080 |
| H | 3.675081  | -1.269711 | -1.935845 |
| C | 5.101398  | -0.102055 | -0.816987 |
| C | 6.071153  | -0.502637 | -1.937864 |
| H | 6.955937  | 0.153559  | -1.944063 |
| H | 6.421447  | -1.539183 | -1.807846 |
| H | 5.588672  | -0.431544 | -2.925668 |
| C | 4.667672  | 1.345287  | -1.063057 |
| H | 4.139890  | 1.450808  | -2.024164 |
| H | 4.013026  | 1.728903  | -0.266290 |
| H | 5.553927  | 1.998886  | -1.101719 |
| C | 5.873966  | -0.177481 | 0.506100  |
| H | 5.292771  | 0.195800  | 1.358904  |
| H | 6.173759  | -1.213855 | 0.729105  |

|   |           |          |           |
|---|-----------|----------|-----------|
| H | 6.791809  | 0.428900 | 0.442879  |
| N | -2.780458 | 2.167204 | -0.768540 |
| C | -1.728664 | 2.900114 | -1.188917 |
| N | -1.612681 | 4.193761 | -0.812364 |
| N | -0.851933 | 2.310963 | -2.004966 |
| H | -0.077185 | 1.093344 | -1.183176 |
| C | -3.302690 | 1.059453 | -1.547582 |
| H | -4.327582 | 1.299075 | -1.873832 |
| H | -2.667109 | 0.881110 | -2.419669 |
| H | -3.337140 | 0.159909 | -0.917215 |
| C | -3.437353 | 2.414768 | 0.498266  |
| H | -2.804790 | 3.044146 | 1.132892  |
| H | -4.424138 | 2.886404 | 0.367060  |
| H | -3.570675 | 1.443862 | 0.996087  |
| C | -2.771335 | 5.049940 | -0.643163 |
| H | -2.953421 | 5.293042 | 0.415226  |
| H | -2.590411 | 5.988005 | -1.188081 |
| H | -3.662626 | 4.570925 | -1.062899 |
| C | -0.325943 | 4.857435 | -0.744024 |
| H | -0.292410 | 5.475166 | 0.165108  |
| H | 0.488378  | 4.125763 | -0.687080 |
| H | -0.168911 | 5.515469 | -1.613869 |
| H | -0.063127 | 2.913266 | -2.247762 |

#### Vibrational frequencies

|           |          |          |
|-----------|----------|----------|
| -240.2089 | 18.6539  | 30.0797  |
| 31.3030   | 32.0707  | 40.6930  |
| 41.3011   | 44.9997  | 49.5722  |
| 56.7740   | 62.1162  | 68.2231  |
| 73.0227   | 82.4631  | 93.6786  |
| 105.9189  | 109.8288 | 114.8735 |
| 125.2992  | 129.3693 | 139.1686 |
| 149.8998  | 158.2323 | 162.8327 |
| 169.4028  | 180.1555 | 195.6081 |
| 198.0350  | 204.6706 | 208.3647 |

#### M7

|                                            |          |              |
|--------------------------------------------|----------|--------------|
| Zero-point correction=                     | 0.603255 |              |
| Thermal correction to Energy=              | 0.637568 |              |
| Thermal correction to Enthalpy=            | 0.638512 |              |
| Thermal correction to Gibbs Free Energy=   |          | 0.539592     |
| Sum of electronic and zero-point Energies= |          | -1365.607744 |
| Sum of electronic and thermal Energies=    |          | -1365.573431 |

|                                              |              |
|----------------------------------------------|--------------|
| Sum of electronic and thermal Enthalpies=    | -1365.572487 |
| Sum of electronic and thermal Free Energies= | -1365.671408 |

Cartesian coordinates

|   |           |           |           |
|---|-----------|-----------|-----------|
| C | -2.365570 | 1.003249  | -1.057923 |
| H | -1.460400 | 1.619727  | -0.961294 |
| H | -2.800955 | 1.166745  | -2.057628 |
| H | -3.080763 | 1.356988  | -0.302109 |
| C | -0.914595 | -0.824540 | -1.881977 |
| H | -0.040478 | -0.167022 | -1.787704 |
| H | -0.574531 | -1.866501 | -1.754553 |
| H | -1.311522 | -0.723840 | -2.906461 |
| C | -1.374821 | -0.637270 | 0.579265  |
| H | -2.168012 | -0.473719 | 1.316880  |
| H | -1.091239 | -1.705116 | 0.676848  |
| C | -0.233199 | 0.235522  | 0.982085  |
| C | -0.320913 | 1.361531  | 1.788367  |
| O | 0.598750  | 2.122887  | 2.153458  |
| O | -1.626373 | 1.659309  | 2.186085  |
| C | -1.758798 | 2.762652  | 3.034575  |
| H | -1.383213 | 3.692584  | 2.575379  |
| H | -2.832490 | 2.873931  | 3.245412  |
| H | -1.218815 | 2.629725  | 3.988446  |
| N | 1.080799  | -0.078716 | 0.505265  |
| C | 1.892255  | 0.892145  | -0.088002 |
| C | 1.603942  | -1.333259 | 0.781903  |
| O | 3.098436  | 0.935203  | 0.020452  |
| O | 1.213221  | -2.045679 | 1.681575  |
| O | 1.160232  | 1.753492  | -0.788431 |
| O | 2.491944  | -1.697291 | -0.148745 |
| C | 1.706978  | 3.007884  | -1.261921 |
| C | 3.337076  | -2.859935 | 0.013368  |
| C | 2.496764  | -4.128554 | -0.068286 |
| H | 3.151001  | -5.013036 | -0.049982 |
| H | 1.796279  | -4.182426 | 0.773883  |
| H | 1.923371  | -4.143100 | -1.007764 |
| C | 4.113688  | -2.767236 | 1.321014  |
| H | 3.443590  | -2.851436 | 2.185530  |
| H | 4.857843  | -3.575778 | 1.369390  |
| H | 4.641850  | -1.803695 | 1.375432  |
| C | 4.283275  | -2.764509 | -1.174892 |
| H | 4.982523  | -3.612982 | -1.175420 |
| H | 3.715889  | -2.776701 | -2.117228 |



|   |           |           |           |
|---|-----------|-----------|-----------|
| H | 4.860633  | -1.829481 | -1.130540 |
| C | 2.339508  | 3.782091  | -0.111553 |
| H | 3.300405  | 3.342458  | 0.182473  |
| H | 2.503173  | 4.826395  | -0.417071 |
| H | 1.665854  | 3.744434  | 0.757088  |
| C | 2.689708  | 2.741170  | -2.394914 |
| H | 3.056549  | 3.694038  | -2.805277 |
| H | 3.544415  | 2.158468  | -2.029027 |
| H | 2.198610  | 2.182445  | -3.206320 |
| C | 0.477623  | 3.743749  | -1.775321 |
| H | 0.766734  | 4.713773  | -2.205111 |
| H | -0.030884 | 3.152694  | -2.551080 |
| H | -0.232491 | 3.918724  | -0.953957 |
| C | -1.981846 | -0.458955 | -0.842192 |
| C | -3.146411 | -1.456408 | -1.055535 |
| H | -3.272976 | -1.592448 | -2.145578 |
| H | -2.777149 | -2.431927 | -0.687521 |
| C | -4.578253 | -1.270706 | -0.493482 |
| C | -5.297932 | -2.610413 | -0.703372 |
| H | -6.347688 | -2.551343 | -0.372785 |
| H | -5.295625 | -2.899400 | -1.767061 |
| H | -4.808435 | -3.417573 | -0.134950 |
| C | -4.621419 | -0.940376 | 1.000207  |
| H | -4.082525 | -1.695211 | 1.593559  |
| H | -4.178234 | 0.040843  | 1.223024  |
| H | -5.666622 | -0.921827 | 1.351140  |
| C | -5.361870 | -0.203262 | -1.267201 |
| H | -4.961503 | 0.805825  | -1.107921 |
| H | -5.341697 | -0.407471 | -2.350086 |
| H | -6.416913 | -0.197541 | -0.947362 |

#### Vibrational frequencies

|          |          |          |
|----------|----------|----------|
| 27.8945  | 31.2907  | 37.5477  |
| 41.7994  | 52.5449  | 55.8175  |
| 62.5953  | 74.7168  | 83.6247  |
| 99.0029  | 107.2317 | 118.7891 |
| 124.1831 | 135.6147 | 148.6301 |
| 154.1699 | 162.4048 | 178.4151 |
| 187.6292 | 210.5696 | 220.8282 |
| 226.8228 | 229.1374 | 234.2668 |
| 241.0586 | 251.2299 | 260.3758 |
| 268.1840 | 271.0021 | 280.5686 |

**M8**

|                                              |              |              |
|----------------------------------------------|--------------|--------------|
| Zero-point correction=                       | 0.806746     |              |
| Thermal correction to Energy=                | 0.853270     |              |
| Thermal correction to Enthalpy=              | 0.854215     |              |
| Thermal correction to Gibbs Free Energy=     |              | 0.728079     |
| Sum of electronic and zero-point Energies=   |              | -1727.854559 |
| Sum of electronic and thermal Energies=      | -1727.808035 |              |
| Sum of electronic and thermal Enthalpies=    |              | -1727.807091 |
| Sum of electronic and thermal Free Energies= |              | -1727.933226 |

## Cartesian coordinates

|   |           |           |           |
|---|-----------|-----------|-----------|
| C | 1.245941  | -2.854518 | 0.859721  |
| H | 0.421307  | -2.487865 | 1.486788  |
| H | 1.319278  | -3.947444 | 0.980257  |
| H | 2.170729  | -2.398129 | 1.240170  |
| C | -0.390381 | -3.058421 | -0.988438 |
| H | -1.184667 | -2.674471 | -0.334224 |
| H | -0.646146 | -2.799464 | -2.029873 |
| H | -0.382919 | -4.158393 | -0.908468 |
| C | 0.899156  | -0.924627 | -0.728497 |
| H | 1.904398  | -0.518262 | -0.580801 |
| H | 0.641923  | -0.706276 | -1.783729 |
| C | -0.005599 | -0.168776 | 0.189203  |
| C | 0.380646  | 0.447465  | 1.366661  |
| O | -0.349868 | 1.019523  | 2.206105  |
| O | 1.761789  | 0.414619  | 1.577663  |
| C | 2.201745  | 0.481854  | 2.905529  |
| H | 2.233821  | -0.523317 | 3.366582  |
| H | 3.221206  | 0.895469  | 2.902958  |
| H | 1.546743  | 1.122653  | 3.513418  |
| N | -1.401005 | -0.078574 | -0.124850 |
| C | -2.388796 | -0.388729 | 0.827906  |
| C | -1.753364 | 0.512583  | -1.318707 |
| O | -3.436347 | 0.205284  | 0.933041  |
| O | -0.985417 | 1.210704  | -1.965770 |
| O | -2.003446 | -1.411972 | 1.575266  |
| O | -2.958720 | 0.150753  | -1.728061 |
| C | -2.711198 | -1.777294 | 2.790194  |
| C | -3.637731 | 0.815457  | -2.828362 |
| C | -2.931294 | 0.498541  | -4.139417 |
| H | -3.510838 | 0.908200  | -4.979869 |
| H | -1.923909 | 0.931698  | -4.155358 |
| H | -2.852753 | -0.590662 | -4.274604 |

|   |           |           |           |
|---|-----------|-----------|-----------|
| C | -3.718872 | 2.312220  | -2.558914 |
| H | -2.727581 | 2.780854  | -2.601918 |
| H | -4.364437 | 2.787364  | -3.311730 |
| H | -4.154239 | 2.491973  | -1.564809 |
| C | -5.023569 | 0.189887  | -2.795332 |
| H | -5.650193 | 0.611766  | -3.593801 |
| H | -4.956317 | -0.898237 | -2.940075 |
| H | -5.506689 | 0.381617  | -1.826499 |
| C | -2.814451 | -0.576416 | 3.721961  |
| H | -3.547677 | 0.151323  | 3.353153  |
| H | -3.121724 | -0.915892 | 4.722239  |
| H | -1.836071 | -0.078054 | 3.779728  |
| C | -4.071999 | -2.359090 | 2.431571  |
| H | -4.577589 | -2.710199 | 3.343375  |
| H | -4.701370 | -1.602193 | 1.947060  |
| H | -3.955463 | -3.216019 | 1.750797  |
| C | -1.813251 | -2.842534 | 3.400460  |
| H | -2.267331 | -3.238841 | 4.319984  |
| H | -1.664795 | -3.673638 | 2.695733  |
| H | -0.830077 | -2.417165 | 3.647691  |
| C | 0.969594  | -2.470558 | -0.592321 |
| C | 1.998614  | -3.037494 | -1.600289 |
| H | 1.744410  | -4.098998 | -1.774331 |
| H | 1.787854  | -2.533234 | -2.561957 |
| C | 3.534504  | -3.007812 | -1.395750 |
| C | 4.153702  | -3.395453 | -2.745795 |
| H | 5.252364  | -3.446799 | -2.676316 |
| H | 3.791407  | -4.380945 | -3.080790 |
| H | 3.897243  | -2.660774 | -3.525981 |
| C | 4.084464  | -1.634838 | -1.002354 |
| H | 3.800194  | -0.864396 | -1.736404 |
| H | 3.725648  | -1.311113 | -0.014467 |
| H | 5.185772  | -1.667260 | -0.963338 |
| C | 3.994013  | -4.045812 | -0.364426 |
| H | 3.666065  | -3.799101 | 0.653310  |
| H | 3.602880  | -5.045937 | -0.611829 |
| H | 5.094451  | -4.110258 | -0.353189 |
| N | 0.917812  | 3.562948  | 0.606939  |
| C | 1.856547  | 2.995935  | -0.161434 |
| N | 3.165761  | 3.186144  | 0.119499  |
| N | 1.511722  | 2.269726  | -1.216730 |
| H | 0.596164  | 1.793587  | -1.293373 |
| C | -0.468361 | 3.618962  | 0.185049  |

|   |           |          |           |
|---|-----------|----------|-----------|
| H | -0.915364 | 4.545039 | 0.574425  |
| H | -0.538490 | 3.625061 | -0.908291 |
| H | -1.020710 | 2.755446 | 0.590067  |
| C | 1.122518  | 3.792250 | 2.025724  |
| H | 2.122526  | 3.465817 | 2.325731  |
| H | 0.992926  | 4.856228 | 2.277836  |
| H | 0.391899  | 3.173003 | 2.567800  |
| C | 3.678701  | 4.459895 | 0.579186  |
| H | 4.132966  | 4.383240 | 1.580200  |
| H | 4.449765  | 4.816618 | -0.122972 |
| H | 2.876047  | 5.205430 | 0.609150  |
| C | 4.146205  | 2.196968 | -0.271058 |
| H | 4.963869  | 2.201995 | 0.464097  |
| H | 3.690308  | 1.199307 | -0.258641 |
| H | 4.584040  | 2.399012 | -1.265225 |
| H | 2.220280  | 2.019759 | -1.892066 |

#### Vibrational frequencies

|          |          |          |
|----------|----------|----------|
| 16.8503  | 22.0177  | 31.9259  |
| 33.6743  | 38.2260  | 45.5583  |
| 46.5916  | 49.9050  | 58.4676  |
| 67.4447  | 70.6297  | 75.3577  |
| 76.1551  | 89.1636  | 93.8354  |
| 101.4477 | 103.5919 | 105.7774 |
| 117.7076 | 134.9988 | 136.2593 |
| 137.8471 | 151.8175 | 158.3245 |
| 167.8443 | 171.5108 | 178.7240 |
| 192.1889 | 202.2180 | 207.8558 |

#### TS5

|                                              |          |              |
|----------------------------------------------|----------|--------------|
| Zero-point correction=                       | 0.802408 |              |
| Thermal correction to Energy=                | 0.848434 |              |
| Thermal correction to Enthalpy=              | 0.849378 |              |
| Thermal correction to Gibbs Free Energy=     |          | 0.723367     |
| Sum of electronic and zero-point Energies=   |          | -1727.850701 |
| Sum of electronic and thermal Energies=      |          | -1727.804674 |
| Sum of electronic and thermal Enthalpies=    |          | -1727.803730 |
| Sum of electronic and thermal Free Energies= |          | -1727.929741 |

#### Cartesian coordinates

|   |          |           |          |
|---|----------|-----------|----------|
| C | 1.089524 | -2.710320 | 1.218771 |
| H | 0.343848 | -2.136461 | 1.783661 |
| H | 1.028215 | -3.761227 | 1.543608 |

|   |           |           |           |
|---|-----------|-----------|-----------|
| H | 2.079499  | -2.317665 | 1.485388  |
| C | -0.631949 | -3.061322 | -0.534184 |
| H | -1.359794 | -2.472344 | 0.038429  |
| H | -0.889851 | -2.979974 | -1.603416 |
| H | -0.746006 | -4.117958 | -0.241003 |
| C | 0.934320  | -1.108972 | -0.739316 |
| H | 1.994729  | -0.834210 | -0.730865 |
| H | 0.631102  | -1.072162 | -1.800740 |
| C | 0.218614  | 0.018297  | -0.025472 |
| C | 0.730229  | 0.581014  | 1.196591  |
| O | 0.125270  | 1.310028  | 1.975214  |
| O | 2.058270  | 0.344693  | 1.360097  |
| C | 2.678267  | 0.989296  | 2.451127  |
| H | 2.148627  | 0.783406  | 3.392626  |
| H | 3.700072  | 0.593431  | 2.503766  |
| H | 2.716279  | 2.080032  | 2.304111  |
| N | -1.225635 | 0.081660  | -0.131761 |
| C | -2.087820 | 0.058303  | 0.983536  |
| C | -1.765447 | 0.243480  | -1.397250 |
| O | -3.051759 | 0.777778  | 1.087226  |
| O | -1.126649 | 0.629782  | -2.351932 |
| O | -1.708246 | -0.855202 | 1.863654  |
| O | -3.026249 | -0.177450 | -1.434904 |
| C | -2.375702 | -0.989645 | 3.153091  |
| C | -3.885926 | 0.069239  | -2.578822 |
| C | -3.401694 | -0.741041 | -3.773853 |
| H | -4.116390 | -0.639671 | -4.603996 |
| H | -2.416119 | -0.394547 | -4.107794 |
| H | -3.332974 | -1.806568 | -3.507252 |
| C | -3.940822 | 1.562191  | -2.874851 |
| H | -2.976752 | 1.928997  | -3.248561 |
| H | -4.711251 | 1.759844  | -3.634292 |
| H | -4.203476 | 2.116993  | -1.961664 |
| C | -5.239198 | -0.432423 | -2.098859 |
| H | -5.990724 | -0.317467 | -2.892802 |
| H | -5.177767 | -1.495957 | -1.825252 |
| H | -5.567411 | 0.135140  | -1.216149 |
| C | -2.354044 | 0.330159  | 3.913216  |
| H | -3.021985 | 1.067888  | 3.453342  |
| H | -2.679184 | 0.153094  | 4.949042  |
| H | -1.334720 | 0.739559  | 3.917668  |
| C | -3.789690 | -1.507878 | 2.927420  |
| H | -4.273920 | -1.695793 | 3.897062  |

|   |           |           |           |
|---|-----------|-----------|-----------|
| H | -4.388541 | -0.777386 | 2.369192  |
| H | -3.765530 | -2.453942 | 2.365771  |
| C | -1.532823 | -2.028073 | 3.876460  |
| H | -1.972699 | -2.246100 | 4.860068  |
| H | -1.486362 | -2.962673 | 3.299126  |
| H | -0.508095 | -1.658394 | 4.026157  |
| C | 0.802292  | -2.579436 | -0.274670 |
| C | 1.717007  | -3.462381 | -1.161595 |
| H | 1.323263  | -4.493701 | -1.115701 |
| H | 1.536825  | -3.135220 | -2.202184 |
| C | 3.251232  | -3.595813 | -0.981908 |
| C | 3.764380  | -4.313161 | -2.238381 |
| H | 4.848892  | -4.497234 | -2.172459 |
| H | 3.265209  | -5.286628 | -2.371783 |
| H | 3.576773  | -3.712489 | -3.142803 |
| C | 3.990351  | -2.259727 | -0.868022 |
| H | 3.791401  | -1.614172 | -1.737987 |
| H | 3.710903  | -1.703638 | 0.038673  |
| H | 5.077763  | -2.436335 | -0.828349 |
| C | 3.611268  | -4.471294 | 0.225209  |
| H | 3.360717  | -3.994085 | 1.181101  |
| H | 3.083811  | -5.437906 | 0.181980  |
| H | 4.693332  | -4.680942 | 0.232871  |
| N | 0.798050  | 3.751747  | -0.089390 |
| C | 1.808518  | 3.055888  | -0.671367 |
| N | 3.083375  | 3.515987  | -0.496896 |
| N | 1.530276  | 1.971083  | -1.353649 |
| H | 0.776459  | 1.095991  | -0.799407 |
| C | -0.572008 | 3.507057  | -0.485516 |
| H | -1.127681 | 4.457548  | -0.466611 |
| H | -0.595501 | 3.082311  | -1.495404 |
| H | -1.062857 | 2.797171  | 0.201200  |
| C | 0.946402  | 4.395835  | 1.198040  |
| H | 1.994251  | 4.391152  | 1.516045  |
| H | 0.590268  | 5.437848  | 1.163732  |
| H | 0.361395  | 3.836500  | 1.946588  |
| C | 3.399164  | 4.927988  | -0.540573 |
| H | 3.916703  | 5.260729  | 0.374246  |
| H | 4.055832  | 5.139286  | -1.401820 |
| H | 2.482579  | 5.516677  | -0.661629 |
| C | 4.194873  | 2.613137  | -0.680952 |
| H | 5.036381  | 2.948685  | -0.057036 |
| H | 3.912541  | 1.601656  | -0.358622 |

|   |          |          |           |
|---|----------|----------|-----------|
| H | 4.546357 | 2.574414 | -1.729140 |
| H | 2.298094 | 1.611748 | -1.910916 |

Vibrational frequencies

|            |          |          |
|------------|----------|----------|
| -1335.7095 | 17.2428  | 21.5436  |
| 23.7938    | 26.8374  | 31.8536  |
| 35.8166    | 39.3888  | 49.7886  |
| 55.9400    | 62.6232  | 69.4712  |
| 75.2640    | 84.0186  | 85.6395  |
| 99.1213    | 105.5000 | 109.9189 |
| 119.9498   | 126.1682 | 134.0461 |
| 137.9606   | 147.0543 | 155.4624 |
| 157.0740   | 160.6796 | 176.3920 |
| 178.1902   | 192.8150 | 206.2173 |

P1

|                                              |          |              |
|----------------------------------------------|----------|--------------|
| Zero-point correction=                       | 0.617435 |              |
| Thermal correction to Energy=                | 0.652364 |              |
| Thermal correction to Enthalpy=              | 0.653308 |              |
| Thermal correction to Gibbs Free Energy=     |          | 0.551091     |
| Sum of electronic and zero-point Energies=   |          | -1366.118047 |
| Sum of electronic and thermal Energies=      |          | -1366.083118 |
| Sum of electronic and thermal Enthalpies=    |          | -1366.082174 |
| Sum of electronic and thermal Free Energies= |          | -1366.184390 |

Cartesian coordinates

|   |           |           |           |
|---|-----------|-----------|-----------|
| C | -1.176383 | -1.980248 | 0.326050  |
| C | -0.425858 | -2.021487 | -1.014906 |
| H | 0.657283  | -1.901930 | -0.880074 |
| H | -0.584492 | -2.992504 | -1.510031 |
| H | -0.754630 | -1.235390 | -1.706501 |
| C | -0.429368 | -2.882579 | 1.316828  |
| H | 0.620196  | -2.578595 | 1.443550  |
| H | -0.908881 | -2.867311 | 2.309061  |
| H | -0.428705 | -3.925589 | 0.962463  |
| C | -1.293379 | -0.554481 | 0.889764  |
| H | -1.784104 | 0.087917  | 0.151305  |
| H | -1.953914 | -0.589983 | 1.767785  |
| C | -0.019375 | 0.147973  | 1.366817  |
| C | -0.274905 | 1.516135  | 1.985515  |
| O | 0.507529  | 2.432394  | 1.952085  |
| O | -1.443217 | 1.568243  | 2.613910  |
| C | -1.752081 | 2.787151  | 3.277080  |

|   |           |           |           |
|---|-----------|-----------|-----------|
| H | -1.825412 | 3.611641  | 2.553451  |
| H | -2.717838 | 2.631064  | 3.769592  |
| H | -0.979511 | 3.032039  | 4.019168  |
| N | 1.057064  | 0.267610  | 0.389798  |
| C | 0.970065  | 1.201652  | -0.651557 |
| C | 2.235939  | -0.435878 | 0.671977  |
| O | 1.894877  | 1.594130  | -1.313745 |
| O | 2.480919  | -0.852696 | 1.782310  |
| O | -0.293400 | 1.593345  | -0.770457 |
| O | 2.952660  | -0.639363 | -0.409789 |
| C | -0.688239 | 2.702870  | -1.631839 |
| C | 4.283908  | -1.241002 | -0.362434 |
| C | 4.181868  | -2.679476 | 0.123390  |
| H | 5.162795  | -3.167095 | 0.024744  |
| H | 3.869230  | -2.722961 | 1.173727  |
| H | 3.458204  | -3.238586 | -0.488619 |
| C | 5.194742  | -0.391608 | 0.511280  |
| H | 4.878946  | -0.417487 | 1.561807  |
| H | 6.223295  | -0.774623 | 0.445786  |
| H | 5.191327  | 0.651498  | 0.161857  |
| C | 4.722014  | -1.188074 | -1.816804 |
| H | 5.732706  | -1.606900 | -1.921404 |
| H | 4.034187  | -1.770163 | -2.447237 |
| H | 4.729889  | -0.149560 | -2.176837 |
| C | 0.062735  | 3.964294  | -1.229474 |
| H | 1.132551  | 3.880462  | -1.456446 |
| H | -0.348561 | 4.822383  | -1.780463 |
| H | -0.056167 | 4.148445  | -0.152017 |
| C | -0.455844 | 2.321432  | -3.086118 |
| H | -0.849773 | 3.112329  | -3.740876 |
| H | 0.613857  | 2.191830  | -3.291688 |
| H | -0.981614 | 1.384461  | -3.324147 |
| C | -2.173246 | 2.845419  | -1.336660 |
| H | -2.597361 | 3.666088  | -1.932053 |
| H | -2.712039 | 1.920232  | -1.587915 |
| H | -2.336072 | 3.065758  | -0.271465 |
| C | -2.593363 | -2.596537 | 0.184820  |
| H | -2.438437 | -3.582017 | -0.288440 |
| H | -2.954726 | -2.818767 | 1.204974  |
| C | -4.828797 | -3.027299 | -0.748769 |
| H | -5.737810 | -2.625073 | -1.223442 |
| H | -4.440451 | -3.835134 | -1.389115 |
| H | -5.120942 | -3.472596 | 0.215930  |



|   |           |           |           |
|---|-----------|-----------|-----------|
| C | -3.779923 | -1.923075 | -0.552013 |
| C | -4.439227 | -0.814618 | 0.280151  |
| H | -4.687009 | -1.173848 | 1.291906  |
| H | -3.805639 | 0.075424  | 0.386222  |
| H | -5.378135 | -0.492861 | -0.198632 |
| C | -3.413293 | -1.365724 | -1.929372 |
| H | -2.732484 | -0.504845 | -1.859258 |
| H | -2.932151 | -2.128161 | -2.560903 |
| H | -4.322067 | -1.023494 | -2.450387 |
| H | 0.422118  | -0.436811 | 2.189165  |

#### Vibrational frequencies

|          |          |          |
|----------|----------|----------|
| 22.0886  | 24.5328  | 29.0924  |
| 31.4233  | 35.1562  | 46.9008  |
| 51.4243  | 60.1371  | 67.5885  |
| 77.7364  | 97.5077  | 106.2469 |
| 124.2747 | 127.7375 | 133.8079 |
| 142.2759 | 149.0201 | 170.2884 |
| 191.9874 | 203.6291 | 214.0882 |
| 217.1645 | 219.2144 | 224.2408 |
| 234.3358 | 240.2627 | 257.7161 |
| 260.9972 | 264.9360 | 267.3570 |

#### Ra

|                                              |          |             |
|----------------------------------------------|----------|-------------|
| Zero-point correction=                       | 0.348536 |             |
| Thermal correction to Energy=                | 0.365448 |             |
| Thermal correction to Enthalpy=              | 0.366392 |             |
| Thermal correction to Gibbs Free Energy=     |          | 0.304094    |
| Sum of electronic and zero-point Energies=   |          | -638.659357 |
| Sum of electronic and thermal Energies=      |          | -638.642446 |
| Sum of electronic and thermal Enthalpies=    |          | -638.641501 |
| Sum of electronic and thermal Free Energies= |          | -638.703799 |

#### Cartesian coordinates

|   |           |           |           |
|---|-----------|-----------|-----------|
| C | -1.096799 | 0.667613  | 0.479862  |
| C | -1.510817 | 0.677099  | 1.953804  |
| H | -1.457175 | -0.333186 | 2.383321  |
| H | -0.825924 | 1.325673  | 2.521505  |
| H | -2.529593 | 1.067085  | 2.084712  |
| C | -1.225902 | 2.079749  | -0.091557 |
| H | -0.564919 | 2.779779  | 0.443569  |
| H | -0.971577 | 2.115440  | -1.161964 |
| H | -2.251291 | 2.451465  | 0.015698  |

|   |           |           |           |
|---|-----------|-----------|-----------|
| C | -3.397225 | -0.545515 | -0.385934 |
| N | 0.274449  | 0.149995  | 0.480742  |
| C | 1.232562  | 0.754562  | -0.088840 |
| H | 1.112393  | 1.717435  | -0.617618 |
| C | 2.604675  | 0.216344  | -0.095785 |
| C | 2.913780  | -0.998406 | 0.534325  |
| C | 3.622370  | 0.926752  | -0.744446 |
| C | 4.214038  | -1.488905 | 0.513118  |
| C | 4.926768  | 0.434794  | -0.765926 |
| C | 5.224499  | -0.773695 | -0.137372 |
| H | 4.447440  | -2.436036 | 1.005838  |
| H | 5.713478  | 0.996402  | -1.275253 |
| C | -1.859130 | -0.378130 | -0.375661 |
| H | -1.435737 | -1.358899 | -0.102208 |
| H | -1.533635 | -0.199594 | -1.415596 |
| C | -3.702290 | -1.473745 | -1.570280 |
| H | -4.779152 | -1.699564 | -1.623346 |
| H | -3.405056 | -1.011428 | -2.524994 |
| H | -3.161046 | -2.428791 | -1.475463 |
| C | -3.909720 | -1.233891 | 0.884556  |
| H | -3.363973 | -2.172315 | 1.072405  |
| H | -3.810747 | -0.602743 | 1.777085  |
| H | -4.977472 | -1.483386 | 0.775630  |
| C | -4.162050 | 0.762278  | -0.597967 |
| H | -4.083411 | 1.434616  | 0.269134  |
| H | -3.799975 | 1.303525  | -1.485949 |
| H | -5.232829 | 0.550691  | -0.748524 |
| H | 2.108941  | -1.540214 | 1.035486  |
| H | 6.245991  | -1.161562 | -0.152810 |
| H | 3.385566  | 1.874225  | -1.237251 |

#### Vibrational frequencies

|          |          |          |
|----------|----------|----------|
| 22.5230  | 43.8015  | 49.5190  |
| 93.9323  | 101.8740 | 140.5415 |
| 199.6102 | 225.8877 | 244.7786 |
| 269.2541 | 275.9002 | 282.0177 |
| 284.9625 | 307.1544 | 317.6121 |
| 325.3755 | 333.3847 | 367.3087 |
| 378.2586 | 391.0842 | 420.5297 |
| 429.6998 | 440.5474 | 487.3258 |
| 516.5519 | 543.9859 | 568.6830 |
| 629.3219 | 657.4684 | 720.1610 |

**<sup>2</sup>Sa**

|                                              |             |             |
|----------------------------------------------|-------------|-------------|
| Zero-point correction=                       | 0.347518    |             |
| Thermal correction to Energy=                | 0.364977    |             |
| Thermal correction to Enthalpy=              | 0.365921    |             |
| Thermal correction to Gibbs Free Energy=     |             | 0.300692    |
| Sum of electronic and zero-point Energies=   |             | -638.428295 |
| Sum of electronic and thermal Energies=      | -638.410836 |             |
| Sum of electronic and thermal Enthalpies=    |             | -638.409892 |
| Sum of electronic and thermal Free Energies= |             | -638.475121 |

## Cartesian coordinates

|   |           |           |           |
|---|-----------|-----------|-----------|
| C | -1.146877 | 0.809599  | 0.418537  |
| C | -1.398914 | 0.686285  | 1.924423  |
| H | -1.193962 | -0.332574 | 2.277664  |
| H | -0.759215 | 1.391144  | 2.473193  |
| H | -2.445186 | 0.933896  | 2.139760  |
| C | -1.451364 | 2.253276  | -0.056172 |
| H | -0.867370 | 2.983477  | 0.520612  |
| H | -1.243506 | 2.370693  | -1.128372 |
| H | -2.516584 | 2.442586  | 0.120629  |
| C | -3.299560 | -0.657521 | -0.348644 |
| N | 0.254303  | 0.660716  | 0.211787  |
| C | 1.354862  | 1.033070  | -0.261941 |
| H | 1.349767  | 2.001455  | -0.800966 |
| C | 2.611584  | 0.314394  | -0.157895 |
| C | 2.693173  | -0.910468 | 0.528830  |
| C | 3.750641  | 0.872134  | -0.759345 |
| C | 3.911171  | -1.567367 | 0.607318  |
| C | 4.966995  | 0.204283  | -0.674544 |
| C | 5.045766  | -1.010776 | 0.006331  |
| H | 3.983901  | -2.517894 | 1.139074  |
| H | 5.856623  | 0.632299  | -1.140010 |
| C | -1.804322 | -0.280276 | -0.470233 |
| H | -1.228225 | -1.206858 | -0.314836 |
| H | -1.610063 | 0.026740  | -1.510837 |
| C | -3.584626 | -1.541848 | -1.571282 |
| H | -4.623233 | -1.905381 | -1.546893 |
| H | -3.442211 | -0.984264 | -2.510130 |
| H | -2.920485 | -2.420329 | -1.593522 |
| C | -3.588058 | -1.488071 | 0.906823  |
| H | -2.902460 | -2.346746 | 0.982606  |
| H | -3.508115 | -0.905648 | 1.833648  |
| H | -4.614249 | -1.884131 | 0.862005  |

|   |           |           |           |
|---|-----------|-----------|-----------|
| C | -4.240381 | 0.547565  | -0.397531 |
| H | -4.172282 | 1.170549  | 0.506942  |
| H | -4.043775 | 1.182426  | -1.275276 |
| H | -5.282741 | 0.200362  | -0.466036 |
| H | 1.801749  | -1.333468 | 0.998012  |
| H | 6.002794  | -1.533107 | 0.072269  |
| H | 3.678169  | 1.824092  | -1.290096 |

#### Vibrational frequencies

|          |          |          |
|----------|----------|----------|
| 17.0410  | 25.9515  | 35.4958  |
| 60.3102  | 107.9743 | 132.1522 |
| 181.9975 | 218.8707 | 230.8685 |
| 245.0342 | 252.9013 | 263.5159 |
| 275.7250 | 281.2377 | 310.8969 |
| 315.0120 | 331.0480 | 356.4135 |
| 377.8534 | 388.2709 | 415.1414 |
| 425.0546 | 430.4618 | 465.8223 |
| 477.1287 | 516.0011 | 552.3618 |
| 624.7734 | 638.1576 | 704.7714 |

#### <sup>3</sup>M3b

|                                              |          |             |
|----------------------------------------------|----------|-------------|
| Zero-point correction=                       | 0.332127 |             |
| Thermal correction to Energy=                | 0.349365 |             |
| Thermal correction to Enthalpy=              | 0.350309 |             |
| Thermal correction to Gibbs Free Energy=     |          | 0.286327    |
| Sum of electronic and zero-point Energies=   |          | -638.078064 |
| Sum of electronic and thermal Energies=      |          | -638.060826 |
| Sum of electronic and thermal Enthalpies=    |          | -638.059882 |
| Sum of electronic and thermal Free Energies= |          | -638.123864 |

#### Cartesian coordinates

|   |           |           |           |
|---|-----------|-----------|-----------|
| C | -1.154983 | 0.930735  | -0.348515 |
| C | -1.761797 | 2.190364  | 0.270446  |
| H | -1.716835 | 2.146037  | 1.369202  |
| H | -1.176510 | 3.064806  | -0.053283 |
| H | -2.807585 | 2.342526  | -0.034407 |
| C | -1.281547 | 1.009907  | -1.876548 |
| H | -0.713817 | 1.880169  | -2.241876 |
| H | -0.844267 | 0.109693  | -2.334774 |
| H | -2.320876 | 1.112811  | -2.217000 |
| N | 0.254414  | 0.932614  | 0.015485  |
| C | 1.119162  | 0.089526  | -0.416303 |
| C | 2.489743  | -0.084519 | -0.152392 |

|   |           |           |           |
|---|-----------|-----------|-----------|
| C | 3.206604  | 0.771492  | 0.768618  |
| C | 3.269114  | -1.115764 | -0.783226 |
| C | 4.555841  | 0.598006  | 1.012161  |
| C | 4.616325  | -1.272572 | -0.525068 |
| C | 5.298309  | -0.420520 | 0.377249  |
| H | 5.059973  | 1.269201  | 1.717699  |
| H | 5.166487  | -2.073641 | -1.031206 |
| C | -1.762409 | -0.377991 | 0.224238  |
| H | -1.356594 | -0.464170 | 1.247212  |
| H | -1.275528 | -1.189083 | -0.345735 |
| C | -4.031586 | -0.484633 | -0.993679 |
| H | -4.104179 | 0.580638  | -1.258173 |
| H | -3.545548 | -1.010476 | -1.830413 |
| H | -5.060293 | -0.871420 | -0.905897 |
| C | -3.365537 | -2.189048 | 0.680426  |
| H | -2.819507 | -2.402849 | 1.613417  |
| H | -4.414092 | -2.497375 | 0.823935  |
| H | -2.931969 | -2.818399 | -0.113175 |
| C | -3.273402 | -0.700230 | 0.317458  |
| C | -3.964681 | 0.089645  | 1.434961  |
| H | -3.436282 | -0.039907 | 2.393169  |
| H | -4.012321 | 1.165564  | 1.221374  |
| H | -4.999054 | -0.266597 | 1.571471  |
| H | 2.643391  | 1.563231  | 1.270935  |
| H | 6.364922  | -0.548239 | 0.576403  |
| H | 2.764652  | -1.787210 | -1.486238 |

Vibrational frequencies

|          |          |          |
|----------|----------|----------|
| 28.6819  | 36.9535  | 48.2239  |
| 71.1103  | 125.1457 | 133.4251 |
| 180.1327 | 210.6020 | 237.7117 |
| 245.5843 | 265.2151 | 275.7874 |
| 303.3039 | 307.5763 | 313.5950 |
| 323.4014 | 326.0549 | 360.2061 |
| 379.1724 | 392.4536 | 430.3358 |
| 431.8658 | 434.0481 | 480.7045 |
| 495.3260 | 508.5238 | 551.1638 |
| 622.6993 | 628.9695 | 660.7231 |

<sup>3</sup>Ea

Zero-point correction= 0.345333

Thermal correction to Energy= 0.362546

Thermal correction to Enthalpy= 0.363491

Thermal correction to Gibbs Free Energy= 0.299866

|                                              |             |
|----------------------------------------------|-------------|
| Sum of electronic and zero-point Energies=   | -638.580898 |
| Sum of electronic and thermal Energies=      | -638.563685 |
| Sum of electronic and thermal Enthalpies=    | -638.562741 |
| Sum of electronic and thermal Free Energies= | -638.626365 |

Cartesian coordinates

|   |           |           |           |
|---|-----------|-----------|-----------|
| C | 1.281943  | -1.265223 | 0.253770  |
| C | 1.975039  | -1.453790 | 1.600301  |
| H | 1.530664  | -0.804163 | 2.368320  |
| H | 1.857730  | -2.497753 | 1.925460  |
| H | 3.048615  | -1.231880 | 1.533610  |
| C | 1.938298  | -2.178727 | -0.799698 |
| H | 1.828611  | -3.233046 | -0.505474 |
| H | 1.472808  | -2.038607 | -1.786362 |
| H | 3.009183  | -1.957693 | -0.886355 |
| C | 2.371479  | 1.185372  | -0.234523 |
| N | -0.067606 | -1.810515 | 0.405995  |
| C | -1.081412 | -1.539760 | -0.462402 |
| H | -1.127789 | -2.167606 | -1.363821 |
| C | -2.141894 | -0.637423 | -0.189575 |
| C | -2.209414 | 0.097981  | 1.026017  |
| C | -3.182235 | -0.441468 | -1.137784 |
| C | -3.246468 | 0.989061  | 1.260142  |
| C | -4.211226 | 0.453355  | -0.890261 |
| C | -4.254166 | 1.180697  | 0.307144  |
| H | -3.277477 | 1.541550  | 2.203033  |
| H | -4.996459 | 0.590901  | -1.638364 |
| C | 1.176979  | 0.203069  | -0.220041 |
| H | 0.392822  | 0.682277  | 0.388861  |
| H | 0.763207  | 0.161242  | -1.241775 |
| C | 1.888061  | 2.407170  | -1.029142 |
| H | 2.660964  | 3.191753  | -1.047964 |
| H | 1.652743  | 2.137360  | -2.070936 |
| H | 0.979202  | 2.838909  | -0.580080 |
| C | 2.743706  | 1.666531  | 1.172518  |
| H | 1.860437  | 2.056508  | 1.703146  |
| H | 3.185153  | 0.872898  | 1.789161  |
| H | 3.482606  | 2.481228  | 1.108777  |
| C | 3.615049  | 0.625609  | -0.927337 |
| H | 4.079796  | -0.187960 | -0.350800 |
| H | 3.380376  | 0.243924  | -1.933300 |
| H | 4.372838  | 1.417517  | -1.038665 |
| H | -3.157674 | -1.002548 | -2.075876 |

|   |           |           |          |
|---|-----------|-----------|----------|
| H | -5.067807 | 1.884124  | 0.497073 |
| H | -1.439734 | -0.060057 | 1.785587 |

Vibrational frequencies

|          |          |          |
|----------|----------|----------|
| 24.1250  | 40.9105  | 52.4488  |
| 81.2114  | 128.1595 | 145.6634 |
| 179.7222 | 217.3518 | 246.6398 |
| 248.1939 | 267.4588 | 274.9723 |
| 289.7920 | 298.5517 | 316.9019 |
| 325.8875 | 328.8681 | 363.7199 |
| 381.6930 | 403.6861 | 422.2471 |
| 426.6356 | 435.3473 | 461.4018 |
| 510.6690 | 532.0974 | 549.7059 |
| 605.2283 | 625.3465 | 680.5430 |

**<sup>3</sup>E<sub>b</sub>**

|                                              |          |              |
|----------------------------------------------|----------|--------------|
| Zero-point correction=                       | 0.534822 |              |
| Thermal correction to Energy=                | 0.564284 |              |
| Thermal correction to Enthalpy=              | 0.565228 |              |
| Thermal correction to Gibbs Free Energy=     |          | 0.470403     |
| Sum of electronic and zero-point Energies=   |          | -1000.329737 |
| Sum of electronic and thermal Energies=      |          | -1000.300275 |
| Sum of electronic and thermal Enthalpies=    |          | -1000.299331 |
| Sum of electronic and thermal Free Energies= |          | -1000.394157 |

Cartesian coordinates

|   |           |           |           |
|---|-----------|-----------|-----------|
| C | 2.219548  | -0.791808 | 1.437001  |
| C | 3.536089  | -0.917755 | 2.198197  |
| H | 4.253514  | -0.148449 | 1.876584  |
| H | 3.348889  | -0.782735 | 3.273578  |
| H | 3.993693  | -1.905470 | 2.049377  |
| C | 1.249613  | -1.898057 | 1.895047  |
| H | 1.046295  | -1.791904 | 2.970948  |
| H | 0.293722  | -1.833084 | 1.355538  |
| H | 1.683626  | -2.890719 | 1.725081  |
| C | 3.175402  | -1.743668 | -0.937758 |
| N | 1.583954  | 0.442932  | 1.901242  |
| C | 0.573543  | 1.042834  | 1.216631  |
| H | -0.440719 | 0.610877  | 1.327021  |
| C | 0.726354  | 2.221361  | 0.443742  |
| C | 1.980289  | 2.876757  | 0.288820  |
| C | -0.402163 | 2.791893  | -0.210070 |
| C | 2.093033  | 4.018342  | -0.491326 |

|   |           |           |           |
|---|-----------|-----------|-----------|
| C | -0.271808 | 3.931348  | -0.987643 |
| C | 0.974695  | 4.556057  | -1.141308 |
| H | 3.066919  | 4.504895  | -0.594638 |
| H | -1.152299 | 4.347274  | -1.485205 |
| C | 2.373375  | -0.722408 | -0.098999 |
| H | 2.796152  | 0.269724  | -0.330319 |
| H | 1.347140  | -0.695701 | -0.499843 |
| C | 2.816520  | -1.443826 | -2.400245 |
| H | 3.384289  | -2.093996 | -3.084602 |
| H | 1.743285  | -1.608311 | -2.587235 |
| H | 3.045591  | -0.397611 | -2.658881 |
| C | 4.689261  | -1.560960 | -0.783359 |
| H | 4.982367  | -0.516127 | -0.974064 |
| H | 5.048299  | -1.834083 | 0.217518  |
| H | 5.223147  | -2.196042 | -1.508389 |
| C | 2.805280  | -3.199046 | -0.645555 |
| H | 3.136543  | -3.519609 | 0.353353  |
| H | 1.717909  | -3.359820 | -0.714787 |
| H | 3.289735  | -3.865135 | -1.377340 |
| H | -1.373889 | 2.305497  | -0.087636 |
| H | 1.071213  | 5.454540  | -1.754952 |
| H | 2.855469  | 2.475214  | 0.806108  |
| N | -4.730391 | -0.520059 | 0.335694  |
| C | -3.351395 | -0.489870 | 0.198800  |
| N | -2.866767 | -1.163389 | -0.904754 |
| N | -2.538393 | 0.091522  | 1.016810  |
| H | -3.046838 | 0.697212  | 1.660386  |
| C | -5.301294 | -0.145056 | 1.602912  |
| H | -6.315027 | -0.565420 | 1.682707  |
| H | -4.697583 | -0.550948 | 2.426627  |
| H | -5.383273 | 0.952644  | 1.735372  |
| C | -5.590837 | -0.301031 | -0.807347 |
| H | -5.018530 | -0.407112 | -1.735740 |
| H | -6.427545 | -1.019105 | -0.824107 |
| H | -6.018183 | 0.719008  | -0.787150 |
| C | -3.405617 | -2.452995 | -1.277300 |
| H | -3.545758 | -2.527366 | -2.368377 |
| H | -2.722394 | -3.266221 | -0.967346 |
| H | -4.370970 | -2.620362 | -0.786790 |
| C | -1.489303 | -0.965230 | -1.273601 |
| H | -1.361754 | -1.200061 | -2.341805 |
| H | -1.193157 | 0.075112  | -1.095461 |
| H | -0.802211 | -1.614929 | -0.698296 |



Vibrational frequencies

|          |          |          |
|----------|----------|----------|
| 4.9260   | 22.1633  | 25.4523  |
| 35.6785  | 40.1672  | 41.2575  |
| 54.4544  | 61.3802  | 72.9672  |
| 88.2776  | 97.5270  | 105.4038 |
| 122.8320 | 130.7441 | 138.7346 |
| 146.0613 | 179.4307 | 197.4883 |
| 216.0519 | 219.3801 | 236.5494 |
| 239.7791 | 246.0834 | 264.8699 |
| 278.1883 | 279.5760 | 287.2918 |
| 306.1441 | 306.6836 | 309.5371 |

TSa

|                                              |          |              |
|----------------------------------------------|----------|--------------|
| Zero-point correction=                       | 1.241995 |              |
| Thermal correction to Energy=                | 1.328627 |              |
| Thermal correction to Enthalpy=              | 1.329571 |              |
| Thermal correction to Gibbs Free Energy=     |          | 1.115133     |
| Sum of electronic and zero-point Energies=   |          | -4876.939632 |
| Sum of electronic and thermal Energies=      |          | -4876.853000 |
| Sum of electronic and thermal Enthalpies=    |          | -4876.852056 |
| Sum of electronic and thermal Free Energies= |          | -4877.066494 |

Cartesian coordinates

|    |           |           |           |
|----|-----------|-----------|-----------|
| Ir | -2.492590 | 0.571104  | -0.175676 |
| C  | -3.969950 | -3.863814 | 0.990973  |
| C  | -3.128591 | -3.703746 | -0.103915 |
| C  | -2.681161 | -2.438950 | -0.427470 |
| C  | -4.015895 | -1.475401 | 1.260743  |
| C  | -4.402850 | -2.741886 | 1.673826  |
| H  | -4.281959 | -4.857786 | 1.306347  |
| H  | -1.991498 | -2.279194 | -1.246687 |
| H  | -5.075185 | -2.850758 | 2.524895  |
| C  | -4.481236 | 2.211040  | 1.456045  |
| C  | -3.995411 | 0.970266  | 1.093623  |
| C  | -4.499712 | -0.196346 | 1.748668  |
| C  | -5.460087 | -0.039418 | 2.766521  |
| C  | -5.936438 | 1.207480  | 3.128994  |
| C  | -5.437832 | 2.315465  | 2.457233  |
| H  | -4.136327 | 3.126523  | 0.967647  |
| H  | -6.683670 | 1.308032  | 3.925625  |
| N  | -3.093715 | -1.346343 | 0.226761  |
| F  | -5.944464 | -1.099137 | 3.402422  |

|   |           |           |           |
|---|-----------|-----------|-----------|
| F | -5.890023 | 3.521237  | 2.797718  |
| C | -2.795470 | -4.885978 | -0.975196 |
| F | -1.894031 | -4.577979 | -1.912794 |
| F | -3.894879 | -5.304787 | -1.616753 |
| F | -2.339292 | -5.926872 | -0.296448 |
| C | 1.152231  | -1.947053 | -2.181084 |
| C | 0.212818  | -1.344324 | -3.024520 |
| C | -0.707410 | -0.449571 | -2.510638 |
| C | 0.225042  | -0.614424 | -0.391450 |
| C | 1.177815  | -1.516223 | -0.849897 |
| H | 0.181429  | -1.575685 | -4.090600 |
| H | -1.491017 | -0.010131 | -3.130102 |
| C | 0.961711  | -0.029606 | 3.299248  |
| C | 1.159946  | -0.373331 | 1.965413  |
| C | 0.127833  | -0.189050 | 1.022798  |
| C | -1.236447 | 0.746573  | 2.658333  |
| C | -0.270059 | 0.551812  | 3.640664  |
| H | 2.108475  | -0.781297 | 1.610021  |
| H | -2.206384 | 1.192388  | 2.890000  |
| H | -0.494527 | 0.851210  | 4.646540  |
| N | -0.751248 | -0.152476 | -1.194227 |
| N | -1.040903 | 0.370065  | 1.394062  |
| C | -4.432470 | 2.443433  | -3.430027 |
| C | -5.256389 | 1.507673  | -4.022988 |
| C | -5.294610 | 0.223804  | -3.453838 |
| C | -4.547248 | -0.108432 | -2.329045 |
| C | -3.700453 | 0.828595  | -1.746255 |
| C | -3.653870 | 2.133920  | -2.312073 |
| H | -5.841911 | 1.757203  | -4.907428 |
| H | -4.636263 | -1.131052 | -1.945191 |
| C | -1.655352 | 5.180535  | -1.208647 |
| C | -2.553078 | 4.417661  | -1.945077 |
| C | -2.750334 | 3.073369  | -1.621118 |
| C | -1.210358 | 3.245633  | 0.124100  |
| C | -0.952306 | 4.584096  | -0.146352 |
| H | -1.476698 | 6.224840  | -1.458629 |
| H | -3.080547 | 4.871460  | -2.771990 |
| H | -0.685609 | 2.735219  | 0.950993  |
| F | -6.094371 | -0.666962 | -4.010446 |
| F | -4.388095 | 3.654912  | -3.977487 |
| N | -2.078290 | 2.530692  | -0.577876 |
| C | 0.049528  | 5.354446  | 0.659003  |
| F | -0.545204 | 6.374654  | 1.332763  |

|   |           |           |           |
|---|-----------|-----------|-----------|
| F | 0.992565  | 5.914173  | -0.154554 |
| F | 0.673354  | 4.557056  | 1.555597  |
| C | 1.977143  | -0.322632 | 4.392872  |
| C | 3.204505  | -1.036003 | 3.817145  |
| H | 3.709511  | -0.420455 | 3.073725  |
| H | 3.937210  | -1.243919 | 4.632178  |
| H | 2.938106  | -2.004205 | 3.371047  |
| C | 2.409292  | 0.994543  | 5.053830  |
| H | 3.132656  | 0.797167  | 5.852331  |
| H | 2.883721  | 1.692569  | 4.320257  |
| H | 1.546909  | 1.523032  | 5.517405  |
| C | 1.299981  | -1.230037 | 5.449229  |
| H | 0.486662  | -0.698383 | 5.972628  |
| H | 0.874884  | -2.138904 | 4.985656  |
| H | 2.046206  | -1.537654 | 6.190493  |
| H | 1.880748  | -1.944264 | -0.129770 |
| C | 2.033471  | -3.085535 | -2.695656 |
| C | 1.094484  | -4.229966 | -3.126962 |
| H | 0.385027  | -3.924339 | -3.923640 |
| H | 1.701385  | -5.067556 | -3.523539 |
| H | 0.503171  | -4.593703 | -2.261102 |
| C | 2.871720  | -2.620306 | -3.908128 |
| H | 3.634799  | -1.878503 | -3.568052 |
| H | 3.416670  | -3.489326 | -4.325902 |
| H | 2.263410  | -2.167411 | -4.713623 |
| C | 2.968563  | -3.618822 | -1.611409 |
| H | 3.659185  | -2.827874 | -1.270694 |
| H | 2.407214  | -3.996295 | -0.757225 |
| H | 3.568820  | -4.448441 | -2.006554 |
| P | 0.336846  | -4.304171 | 1.798104  |
| F | 0.111875  | -4.449190 | 0.180812  |
| F | 1.184238  | -5.697147 | 1.818536  |
| F | 1.727936  | -3.456500 | 1.511069  |
| F | 0.579510  | -4.106613 | 3.408422  |
| F | -0.516181 | -2.878963 | 1.774384  |
| F | -1.022242 | -5.123578 | 2.099294  |
| C | 4.757850  | 2.486641  | 0.949568  |
| C | 4.599601  | 2.561757  | 2.458339  |
| H | 3.568215  | 2.852389  | 2.717622  |
| H | 4.790859  | 1.574741  | 2.895794  |
| H | 5.280359  | 3.280371  | 2.913643  |
| C | 6.186071  | 2.031503  | 0.605359  |
| H | 6.368709  | 1.008843  | 0.999791  |

|   |          |           |           |
|---|----------|-----------|-----------|
| H | 6.357099 | 2.002964  | -0.488226 |
| H | 6.940350 | 2.710803  | 1.040796  |
| C | 4.916202 | 5.216994  | 0.611590  |
| N | 3.813983 | 1.468357  | 0.467430  |
| C | 3.728775 | 1.036485  | -0.758288 |
| C | 2.816510 | 1.381505  | -1.782804 |
| C | 1.722467 | 2.303124  | -1.581314 |
| C | 2.930910 | 0.837883  | -3.100284 |
| C | 0.857994 | 2.649114  | -2.599799 |
| C | 2.051275 | 1.195263  | -4.119373 |
| C | 1.018115 | 2.105127  | -3.887135 |
| H | 0.056791 | 3.371145  | -2.402534 |
| H | 2.187866 | 0.760949  | -5.121413 |
| C | 4.383564 | 3.796141  | 0.199272  |
| H | 3.284795 | 3.884357  | 0.223226  |
| H | 4.638446 | 3.627222  | -0.865046 |
| C | 4.593170 | 6.125242  | -0.585689 |
| H | 4.840952 | 7.167404  | -0.361149 |
| H | 5.180683 | 5.830915  | -1.480572 |
| H | 3.512676 | 6.075871  | -0.851441 |
| C | 4.173914 | 5.755972  | 1.847283  |
| H | 3.077640 | 5.757654  | 1.675197  |
| H | 4.384111 | 5.180168  | 2.761162  |
| H | 4.487751 | 6.808091  | 2.021874  |
| C | 6.436248 | 5.265841  | 0.847291  |
| H | 6.733959 | 4.710933  | 1.767019  |
| H | 6.994310 | 4.847752  | -0.004268 |
| H | 6.755961 | 6.294922  | 0.989519  |
| H | 4.769607 | -0.026070 | -1.144811 |
| N | 7.186489 | -2.418123 | -1.903765 |
| C | 6.225251 | -1.805537 | -1.158185 |
| N | 5.801603 | -2.438735 | -0.037924 |
| N | 5.672014 | -0.685964 | -1.574033 |
| H | 6.204425 | -0.172450 | -2.266518 |
| C | 7.297695 | -2.121575 | -3.330806 |
| H | 7.738260 | -3.010737 | -3.837807 |
| H | 6.301321 | -1.947481 | -3.743064 |
| H | 7.944188 | -1.246172 | -3.524574 |
| C | 8.377011 | -2.981566 | -1.306053 |
| H | 8.322356 | -2.916281 | -0.202722 |
| H | 8.507209 | -4.052491 | -1.579853 |
| H | 9.267935 | -2.427670 | -1.627358 |
| C | 5.931940 | -3.877519 | 0.150379  |

|   |          |           |           |
|---|----------|-----------|-----------|
| H | 6.705876 | -4.120721 | 0.891098  |
| H | 4.967103 | -4.272885 | 0.506338  |
| H | 6.184453 | -4.357491 | -0.804738 |
| C | 5.068658 | -1.756376 | 1.004115  |
| H | 5.621027 | -1.844514 | 1.966590  |
| H | 4.900982 | -0.678150 | 0.771996  |
| H | 4.088197 | -2.237792 | 1.147085  |
| H | 3.724229 | 0.122917  | -3.309952 |
| H | 1.598332 | 2.709180  | -0.564388 |
| H | 0.323640 | 2.392264  | -4.681609 |

Vibrational frequencies

|           |         |         |
|-----------|---------|---------|
| -677.9270 | 2.8076  | 14.3218 |
| 18.1529   | 19.8598 | 22.5491 |
| 26.1235   | 29.5144 | 30.4358 |
| 32.4071   | 34.9103 | 36.2571 |
| 36.9567   | 38.5743 | 42.4525 |
| 43.6661   | 49.9672 | 51.6735 |
| 59.0011   | 60.8640 | 62.6953 |
| 68.8670   | 71.8286 | 71.9343 |
| 75.7362   | 77.8085 | 81.5623 |
| 82.0056   | 84.1964 | 86.9901 |

**SET1**

M1-B1

0 1

|   |             |             |             |
|---|-------------|-------------|-------------|
| C | 2.39546100  | 0.31110100  | -0.73182800 |
| C | 2.87610700  | -0.38564900 | -2.00794900 |
| H | 2.81166600  | -1.47799300 | -1.90352500 |
| H | 2.23196400  | -0.08763600 | -2.84977800 |
| H | 3.91024400  | -0.11082900 | -2.25977000 |
| C | 2.53599400  | 1.82491100  | -0.90612800 |
| H | 1.90731200  | 2.18318000  | -1.73669200 |
| H | 2.24808900  | 2.37457200  | 0.00310300  |
| H | 3.57231500  | 2.09463400  | -1.13982700 |
| C | 4.64069300  | -0.32315400 | 0.71208000  |
| N | 1.01827900  | -0.15799200 | -0.54696600 |
| C | 0.06331700  | 0.66862600  | -0.38060200 |
| H | 0.23323800  | 1.75566500  | -0.37783700 |
| C | -1.34576500 | 0.32626300  | -0.17231000 |
| C | -1.87591600 | -0.98635500 | -0.16682300 |
| C | -2.26195700 | 1.39246600  | 0.04134800  |
| C | -3.24212600 | -1.22350600 | 0.04484900  |

|     |             |             |             |
|-----|-------------|-------------|-------------|
| C   | -3.61918300 | 1.16733600  | 0.25082900  |
| C   | -4.10351700 | -0.14528200 | 0.25258300  |
| H   | -3.62284800 | -2.24063200 | 0.04532600  |
| H   | -4.32633000 | 1.97734500  | 0.41668400  |
| O   | -1.73757400 | 2.63253300  | 0.03156800  |
| O   | -1.01790000 | -1.99092900 | -0.37525400 |
| O   | -5.42388100 | -0.27956800 | 0.46326700  |
| C   | -1.48022300 | -3.31655200 | -0.38121500 |
| H   | -0.60248000 | -3.94727800 | -0.56833500 |
| H   | -1.92391200 | -3.60029700 | 0.58804700  |
| H   | -2.22153300 | -3.48952500 | -1.17966800 |
| C   | -2.57687300 | 3.74132400  | 0.23326500  |
| H   | -3.06548100 | 3.70624200  | 1.22116900  |
| H   | -1.93553700 | 4.62953500  | 0.18255100  |
| H   | -3.35165200 | 3.81171700  | -0.54823200 |
| C   | -5.98798800 | -1.56781200 | 0.48125400  |
| H   | -5.55908200 | -2.18820400 | 1.28592200  |
| H   | -7.06097000 | -1.43643400 | 0.66610900  |
| H   | -5.85122400 | -2.08527900 | -0.48307900 |
| C   | 3.10753500  | -0.18818100 | 0.55366200  |
| H   | 2.67568700  | -1.17990000 | 0.76798500  |
| H   | 2.74306000  | 0.46893200  | 1.36304600  |
| C   | 4.88471500  | -0.55585500 | 2.20988300  |
| H   | 5.95473100  | -0.72368700 | 2.41177400  |
| H   | 4.55900800  | 0.31188400  | 2.80546200  |
| H   | 4.33050300  | -1.43777800 | 2.56925700  |
| C   | 5.19107800  | -1.54055500 | -0.04025100 |
| H   | 4.63912800  | -2.45429700 | 0.23215800  |
| H   | 5.13300000  | -1.42482300 | -1.13029100 |
| H   | 6.25060800  | -1.69929200 | 0.21821300  |
| C   | 5.41993200  | 0.92486600  | 0.29219600  |
| H   | 5.38310100  | 1.08961400  | -0.79478900 |
| H   | 5.03541900  | 1.82931700  | 0.78905200  |
| H   | 6.48114900  | 0.81695900  | 0.56902700  |
| 1 2 |             |             |             |
| C   | 2.39546100  | 0.31110100  | -0.73182800 |
| C   | 2.87610700  | -0.38564900 | -2.00794900 |
| H   | 2.81166600  | -1.47799300 | -1.90352500 |
| H   | 2.23196400  | -0.08763600 | -2.84977800 |
| H   | 3.91024400  | -0.11082900 | -2.25977000 |
| C   | 2.53599400  | 1.82491100  | -0.90612800 |
| H   | 1.90731200  | 2.18318000  | -1.73669200 |
| H   | 2.24808900  | 2.37457200  | 0.00310300  |

|   |             |             |             |
|---|-------------|-------------|-------------|
| H | 3.57231500  | 2.09463400  | -1.13982700 |
| C | 4.64069300  | -0.32315400 | 0.71208000  |
| N | 1.01827900  | -0.15799200 | -0.54696600 |
| C | 0.06331700  | 0.66862600  | -0.38060200 |
| H | 0.23323800  | 1.75566500  | -0.37783700 |
| C | -1.34576500 | 0.32626300  | -0.17231000 |
| C | -1.87591600 | -0.98635500 | -0.16682300 |
| C | -2.26195700 | 1.39246600  | 0.04134800  |
| C | -3.24212600 | -1.22350600 | 0.04484900  |
| C | -3.61918300 | 1.16733600  | 0.25082900  |
| C | -4.10351700 | -0.14528200 | 0.25258300  |
| H | -3.62284800 | -2.24063200 | 0.04532600  |
| H | -4.32633000 | 1.97734500  | 0.41668400  |
| O | -1.73757400 | 2.63253300  | 0.03156800  |
| O | -1.01790000 | -1.99092900 | -0.37525400 |
| O | -5.42388100 | -0.27956800 | 0.46326700  |
| C | -1.48022300 | -3.31655200 | -0.38121500 |
| H | -0.60248000 | -3.94727800 | -0.56833500 |
| H | -1.92391200 | -3.60029700 | 0.58804700  |
| H | -2.22153300 | -3.48952500 | -1.17966800 |
| C | -2.57687300 | 3.74132400  | 0.23326500  |
| H | -3.06548100 | 3.70624200  | 1.22116900  |
| H | -1.93553700 | 4.62953500  | 0.18255100  |
| H | -3.35165200 | 3.81171700  | -0.54823200 |
| C | -5.98798800 | -1.56781200 | 0.48125400  |
| H | -5.55908200 | -2.18820400 | 1.28592200  |
| H | -7.06097000 | -1.43643400 | 0.66610900  |
| H | -5.85122400 | -2.08527900 | -0.48307900 |
| C | 3.10753500  | -0.18818100 | 0.55366200  |
| H | 2.67568700  | -1.17990000 | 0.76798500  |
| H | 2.74306000  | 0.46893200  | 1.36304600  |
| C | 4.88471500  | -0.55585500 | 2.20988300  |
| H | 5.95473100  | -0.72368700 | 2.41177400  |
| H | 4.55900800  | 0.31188400  | 2.80546200  |
| H | 4.33050300  | -1.43777800 | 2.56925700  |
| C | 5.19107800  | -1.54055500 | -0.04025100 |
| H | 4.63912800  | -2.45429700 | 0.23215800  |
| H | 5.13300000  | -1.42482300 | -1.13029100 |
| H | 6.25060800  | -1.69929200 | 0.21821300  |
| C | 5.41993200  | 0.92486600  | 0.29219600  |
| H | 5.38310100  | 1.08961400  | -0.79478900 |
| H | 5.03541900  | 1.82931700  | 0.78905200  |
| H | 6.48114900  | 0.81695900  | 0.56902700  |

Ir(III)\*-Ir(II)

0 3

|    |             |             |             |
|----|-------------|-------------|-------------|
| Ir | 1.40318200  | -0.37401300 | -0.05211600 |
| C  | -0.83621300 | -4.32254200 | -1.66326200 |
| C  | -1.42325800 | -3.58895800 | -0.60636400 |
| C  | -0.80612500 | -2.43002300 | -0.17584200 |
| C  | 0.92035700  | -2.66529800 | -1.77116200 |
| C  | 0.32345900  | -3.85285000 | -2.23969600 |
| H  | -1.29516200 | -5.24572700 | -2.02092400 |
| H  | -1.23392000 | -1.83910300 | 0.63346000  |
| H  | 0.78848400  | -4.39373200 | -3.06024400 |
| C  | 3.60478700  | -0.06766700 | -2.08876000 |
| C  | 2.49998200  | -0.80157100 | -1.62365900 |
| C  | 2.09553300  | -2.01870600 | -2.28646600 |
| C  | 2.88512200  | -2.45170800 | -3.36931700 |
| C  | 3.97132200  | -1.73130600 | -3.82551300 |
| C  | 4.31557700  | -0.53517100 | -3.17555600 |
| H  | 3.92221700  | 0.85650400  | -1.60471600 |
| H  | 4.54938600  | -2.09222400 | -4.67701800 |
| N  | 0.33647300  | -1.98930700 | -0.71358300 |
| F  | 2.59013300  | -3.58864900 | -4.00060800 |
| F  | 5.36387400  | 0.14568600  | -3.63227700 |
| C  | -2.65984300 | -4.09853100 | 0.06319600  |
| F  | -3.09760200 | -3.28073300 | 1.01799800  |
| F  | -2.43208200 | -5.29331600 | 0.63928700  |
| F  | -3.65252900 | -4.28943300 | -0.81040100 |
| C  | -2.09305600 | 1.09710400  | 3.18093000  |
| C  | -1.03065800 | 0.28598200  | 3.60558600  |
| C  | -0.04906400 | -0.09586500 | 2.70892700  |
| C  | -1.06482600 | 1.07420000  | 0.98787300  |
| C  | -2.07131500 | 1.50583000  | 1.84824400  |
| H  | -0.96391600 | -0.07423600 | 4.63264300  |
| H  | 0.77890800  | -0.73891000 | 3.01303500  |
| C  | -1.94722100 | 2.44650300  | -2.43791500 |
| C  | -2.00613600 | 2.19029700  | -1.06827900 |
| C  | -1.03373000 | 1.41025300  | -0.44771800 |
| C  | 0.07077600  | 1.12269000  | -2.46202800 |
| C  | -0.86524200 | 1.88877600  | -3.13348900 |
| H  | -2.83948700 | 2.56203400  | -0.48055200 |
| H  | 0.92004800  | 0.67759100  | -2.98352900 |
| H  | -0.74099100 | 2.03755400  | -4.20675500 |
| N  | -0.07403100 | 0.27505400  | 1.42216300  |



|   |             |             |             |
|---|-------------|-------------|-------------|
| N | -0.00767100 | 0.89009300  | -1.14571000 |
| C | 4.45031300  | -1.31357400 | 2.66957400  |
| C | 4.29794600  | -2.65101300 | 2.98754500  |
| C | 3.23564000  | -3.35948100 | 2.41608600  |
| C | 2.34641900  | -2.76344800 | 1.53945900  |
| C | 2.50583200  | -1.40710400 | 1.21804500  |
| C | 3.56864500  | -0.63987300 | 1.80627300  |
| H | 4.99543700  | -3.13663800 | 3.67069400  |
| H | 1.54307700  | -3.36409700 | 1.11142800  |
| C | 4.38231700  | 3.05029600  | 1.56931200  |
| C | 4.52216200  | 1.72680500  | 1.93175000  |
| C | 3.61206300  | 0.76067000  | 1.46329800  |
| C | 2.45284900  | 2.43580100  | 0.27353800  |
| C | 3.31036600  | 3.41891700  | 0.72617100  |
| H | 5.08880400  | 3.79863900  | 1.93236400  |
| H | 5.33265300  | 1.41947100  | 2.58798600  |
| H | 1.62827400  | 2.67690200  | -0.39811700 |
| F | 3.09398500  | -4.64415900 | 2.73153600  |
| F | 5.47571900  | -0.66385800 | 3.22175000  |
| N | 2.60023200  | 1.14954800  | 0.60903300  |
| C | 3.11514500  | 4.84666300  | 0.32801900  |
| F | 4.20379400  | 5.34239900  | -0.27396600 |
| F | 2.88136800  | 5.62591200  | 1.39223500  |
| F | 2.08768500  | 4.99993100  | -0.51200400 |
| C | -2.99550000 | 3.27650600  | -3.16559200 |
| C | -4.08531100 | 3.77170900  | -2.21464800 |
| H | -3.67665800 | 4.43753500  | -1.43856000 |
| H | -4.83189800 | 4.34585700  | -2.78255000 |
| H | -4.59982700 | 2.93453300  | -1.72255700 |
| C | -2.30181600 | 4.48436400  | -3.81288900 |
| H | -3.04515100 | 5.09894400  | -4.34331800 |
| H | -1.81500600 | 5.11577400  | -3.05373100 |
| H | -1.53878900 | 4.17883100  | -4.54435700 |
| C | -3.64455300 | 2.40070600  | -4.24891100 |
| H | -2.90906400 | 2.04587900  | -4.98622900 |
| H | -4.13372600 | 1.52828100  | -3.79402700 |
| H | -4.40418200 | 2.98537100  | -4.79027900 |
| H | -2.87493100 | 2.11890300  | 1.45344300  |
| C | -3.23686400 | 1.44261100  | 4.12376300  |
| C | -3.99746600 | 0.13606200  | 4.40939400  |
| H | -3.35252400 | -0.61160900 | 4.89538700  |
| H | -4.84552900 | 0.33968700  | 5.08157600  |
| H | -4.38873700 | -0.29487500 | 3.47598000  |

|      |             |             |             |
|------|-------------|-------------|-------------|
| C    | -2.67746500 | 2.02633200  | 5.42738600  |
| H    | -2.10800300 | 2.94901400  | 5.23649100  |
| H    | -3.50608900 | 2.27220200  | 6.10857100  |
| H    | -2.01844900 | 1.31915400  | 5.95205400  |
| C    | -4.20593500 | 2.44710900  | 3.49926000  |
| H    | -3.70431400 | 3.39516800  | 3.24987200  |
| H    | -4.67444000 | 2.04770600  | 2.58840500  |
| H    | -5.00783000 | 2.67300600  | 4.21725100  |
| P    | -4.88222500 | -0.23329700 | -0.31956600 |
| F    | -3.28196900 | -0.50534700 | -0.11459700 |
| F    | -5.15951800 | -0.75892500 | 1.19502900  |
| F    | -4.69104100 | 1.29448300  | 0.26211700  |
| F    | -6.46511700 | 0.05660000  | -0.52110100 |
| F    | -4.58137700 | 0.32513200  | -1.82276900 |
| F    | -5.06481200 | -1.73368500 | -0.89994200 |
| -1 2 |             |             |             |
| Ir   | 1.40318200  | -0.37401300 | -0.05211600 |
| C    | -0.83621300 | -4.32254200 | -1.66326200 |
| C    | -1.42325800 | -3.58895800 | -0.60636400 |
| C    | -0.80612500 | -2.43002300 | -0.17584200 |
| C    | 0.92035700  | -2.66529800 | -1.77116200 |
| C    | 0.32345900  | -3.85285000 | -2.23969600 |
| H    | -1.29516200 | -5.24572700 | -2.02092400 |
| H    | -1.23392000 | -1.83910300 | 0.63346000  |
| H    | 0.78848400  | -4.39373200 | -3.06024400 |
| C    | 3.60478700  | -0.06766700 | -2.08876000 |
| C    | 2.49998200  | -0.80157100 | -1.62365900 |
| C    | 2.09553300  | -2.01870600 | -2.28646600 |
| C    | 2.88512200  | -2.45170800 | -3.36931700 |
| C    | 3.97132200  | -1.73130600 | -3.82551300 |
| C    | 4.31557700  | -0.53517100 | -3.17555600 |
| H    | 3.92221700  | 0.85650400  | -1.60471600 |
| H    | 4.54938600  | -2.09222400 | -4.67701800 |
| N    | 0.33647300  | -1.98930700 | -0.71358300 |
| F    | 2.59013300  | -3.58864900 | -4.00060800 |
| F    | 5.36387400  | 0.14568600  | -3.63227700 |
| C    | -2.65984300 | -4.09853100 | 0.06319600  |
| F    | -3.09760200 | -3.28073300 | 1.01799800  |
| F    | -2.43208200 | -5.29331600 | 0.63928700  |
| F    | -3.65252900 | -4.28943300 | -0.81040100 |
| C    | -2.09305600 | 1.09710400  | 3.18093000  |
| C    | -1.03065800 | 0.28598200  | 3.60558600  |
| C    | -0.04906400 | -0.09586500 | 2.70892700  |

|   |             |             |             |
|---|-------------|-------------|-------------|
| C | -1.06482600 | 1.07420000  | 0.98787300  |
| C | -2.07131500 | 1.50583000  | 1.84824400  |
| H | -0.96391600 | -0.07423600 | 4.63264300  |
| H | 0.77890800  | -0.73891000 | 3.01303500  |
| C | -1.94722100 | 2.44650300  | -2.43791500 |
| C | -2.00613600 | 2.19029700  | -1.06827900 |
| C | -1.03373000 | 1.41025300  | -0.44771800 |
| C | 0.07077600  | 1.12269000  | -2.46202800 |
| C | -0.86524200 | 1.88877600  | -3.13348900 |
| H | -2.83948700 | 2.56203400  | -0.48055200 |
| H | 0.92004800  | 0.67759100  | -2.98352900 |
| H | -0.74099100 | 2.03755400  | -4.20675500 |
| N | -0.07403100 | 0.27505400  | 1.42216300  |
| N | -0.00767100 | 0.89009300  | -1.14571000 |
| C | 4.45031300  | -1.31357400 | 2.66957400  |
| C | 4.29794600  | -2.65101300 | 2.98754500  |
| C | 3.23564000  | -3.35948100 | 2.41608600  |
| C | 2.34641900  | -2.76344800 | 1.53945900  |
| C | 2.50583200  | -1.40710400 | 1.21804500  |
| C | 3.56864500  | -0.63987300 | 1.80627300  |
| H | 4.99543700  | -3.13663800 | 3.67069400  |
| H | 1.54307700  | -3.36409700 | 1.11142800  |
| C | 4.38231700  | 3.05029600  | 1.56931200  |
| C | 4.52216200  | 1.72680500  | 1.93175000  |
| C | 3.61206300  | 0.76067000  | 1.46329800  |
| C | 2.45284900  | 2.43580100  | 0.27353800  |
| C | 3.31036600  | 3.41891700  | 0.72617100  |
| H | 5.08880400  | 3.79863900  | 1.93236400  |
| H | 5.33265300  | 1.41947100  | 2.58798600  |
| H | 1.62827400  | 2.67690200  | -0.39811700 |
| F | 3.09398500  | -4.64415900 | 2.73153600  |
| F | 5.47571900  | -0.66385800 | 3.22175000  |
| N | 2.60023200  | 1.14954800  | 0.60903300  |
| C | 3.11514500  | 4.84666300  | 0.32801900  |
| F | 4.20379400  | 5.34239900  | -0.27396600 |
| F | 2.88136800  | 5.62591200  | 1.39223500  |
| F | 2.08768500  | 4.99993100  | -0.51200400 |
| C | -2.99550000 | 3.27650600  | -3.16559200 |
| C | -4.08531100 | 3.77170900  | -2.21464800 |
| H | -3.67665800 | 4.43753500  | -1.43856000 |
| H | -4.83189800 | 4.34585700  | -2.78255000 |
| H | -4.59982700 | 2.93453300  | -1.72255700 |
| C | -2.30181600 | 4.48436400  | -3.81288900 |

|   |             |             |             |
|---|-------------|-------------|-------------|
| H | -3.04515100 | 5.09894400  | -4.34331800 |
| H | -1.81500600 | 5.11577400  | -3.05373100 |
| H | -1.53878900 | 4.17883100  | -4.54435700 |
| C | -3.64455300 | 2.40070600  | -4.24891100 |
| H | -2.90906400 | 2.04587900  | -4.98622900 |
| H | -4.13372600 | 1.52828100  | -3.79402700 |
| H | -4.40418200 | 2.98537100  | -4.79027900 |
| H | -2.87493100 | 2.11890300  | 1.45344300  |
| C | -3.23686400 | 1.44261100  | 4.12376300  |
| C | -3.99746600 | 0.13606200  | 4.40939400  |
| H | -3.35252400 | -0.61160900 | 4.89538700  |
| H | -4.84552900 | 0.33968700  | 5.08157600  |
| H | -4.38873700 | -0.29487500 | 3.47598000  |
| C | -2.67746500 | 2.02633200  | 5.42738600  |
| H | -2.10800300 | 2.94901400  | 5.23649100  |
| H | -3.50608900 | 2.27220200  | 6.10857100  |
| H | -2.01844900 | 1.31915400  | 5.95205400  |
| C | -4.20593500 | 2.44710900  | 3.49926000  |
| H | -3.70431400 | 3.39516800  | 3.24987200  |
| H | -4.67444000 | 2.04770600  | 2.58840500  |
| H | -5.00783000 | 2.67300600  | 4.21725100  |
| P | -4.88222500 | -0.23329700 | -0.31956600 |
| F | -3.28196900 | -0.50534700 | -0.11459700 |
| F | -5.15951800 | -0.75892500 | 1.19502900  |
| F | -4.69104100 | 1.29448300  | 0.26211700  |
| F | -6.46511700 | 0.05660000  | -0.52110100 |
| F | -4.58137700 | 0.32513200  | -1.82276900 |
| F | -5.06481200 | -1.73368500 | -0.89994200 |

## SET2

C2-B2

0 3

|    |            |             |             |
|----|------------|-------------|-------------|
| Ir | 2.40410200 | -0.88976700 | -0.08856300 |
| C  | 4.74025300 | 3.29542700  | -0.58453600 |
| C  | 3.69581400 | 3.00239400  | -1.45950800 |
| C  | 3.01261400 | 1.81062100  | -1.29859900 |
| C  | 4.43772900 | 1.12652100  | 0.42662200  |
| C  | 5.11023100 | 2.35473300  | 0.36055300  |
| H  | 5.27278100 | 4.24573500  | -0.65085700 |
| H  | 2.16455700 | 1.56846600  | -1.93581700 |
| H  | 5.93912700 | 2.54900800  | 1.03514400  |
| C  | 4.36052200 | -2.36308500 | 1.73976000  |
| C  | 4.01491300 | -1.19369600 | 1.05473600  |

|   |             |             |             |
|---|-------------|-------------|-------------|
| C | 4.80151400  | -0.02189200 | 1.24850000  |
| C | 5.87641000  | -0.07161400 | 2.14794000  |
| C | 6.21316900  | -1.22198300 | 2.84187000  |
| C | 5.44154700  | -2.35545700 | 2.61171000  |
| H | 3.80351200  | -3.29346300 | 1.62061100  |
| H | 7.05427200  | -1.23173600 | 3.53447700  |
| N | 3.36479100  | 0.90471300  | -0.38181100 |
| F | 6.62397300  | 1.01171600  | 2.36900600  |
| F | 5.75600900  | -3.47434000 | 3.26076900  |
| C | 3.36372500  | 3.92794500  | -2.59285300 |
| F | 2.27272400  | 3.53664100  | -3.25595100 |
| F | 4.37187800  | 3.94847100  | -3.48188000 |
| F | 3.18181900  | 5.18334500  | -2.19640400 |
| C | -1.09062700 | 1.67735000  | -2.32860800 |
| C | -0.41578700 | 0.69545900  | -3.06974100 |
| C | 0.44083200  | -0.19000200 | -2.43112300 |
| C | -0.09344100 | 0.68387200  | -0.36086400 |
| C | -0.94449000 | 1.61858300  | -0.94374800 |
| H | -0.50325800 | 0.64250000  | -4.15604500 |
| H | 1.03180200  | -0.91472900 | -2.99517600 |
| C | -0.40888800 | 1.27257500  | 3.35903100  |
| C | -0.72895200 | 1.23743000  | 2.00333500  |
| C | 0.14025700  | 0.64610500  | 1.09120900  |
| C | 1.58489900  | 0.03626900  | 2.78803700  |
| C | 0.78495800  | 0.64403200  | 3.74021300  |
| H | -1.64789100 | 1.68860100  | 1.63675100  |
| H | 2.51585300  | -0.46443300 | 3.06320800  |
| H | 1.10912400  | 0.62467000  | 4.78156600  |
| N | 0.63907200  | -0.16579900 | -1.10789800 |
| N | 1.26961400  | 0.03314600  | 1.48806200  |
| C | 3.24938800  | -3.89406600 | -2.93460600 |
| C | 4.05885100  | -3.33412600 | -3.90715900 |
| C | 4.44755600  | -2.00919900 | -3.72950100 |
| C | 4.04781500  | -1.24835700 | -2.63943200 |
| C | 3.21765300  | -1.81400000 | -1.66586900 |
| C | 2.81925700  | -3.17472000 | -1.80915000 |
| H | 4.37792700  | -3.91354400 | -4.77305000 |
| H | 4.39513800  | -0.21619700 | -2.57270100 |
| C | 0.98453800  | -5.42678600 | 0.62700300  |
| C | 1.63856600  | -5.04726600 | -0.53190600 |
| C | 2.01409900  | -3.70760200 | -0.72067600 |
| C | 1.02361900  | -3.13952500 | 1.32614600  |
| C | 0.68197400  | -4.45555100 | 1.58420400  |

|   |             |             |             |
|---|-------------|-------------|-------------|
| H | 0.71846500  | -6.47364200 | 0.78770100  |
| H | 1.89697500  | -5.78646400 | -1.28516600 |
| H | 0.78219900  | -2.34820600 | 2.03382000  |
| F | 5.23301100  | -1.45735900 | -4.65086500 |
| F | 2.87660400  | -5.16479200 | -3.10588300 |
| N | 1.67532200  | -2.77795300 | 0.21696500  |
| C | 0.02049200  | -4.83208200 | 2.87742700  |
| F | 0.81106200  | -5.61425400 | 3.61718000  |
| F | -1.11191000 | -5.51641200 | 2.66752700  |
| F | -0.28796900 | -3.76137600 | 3.61212600  |
| C | -1.28124500 | 1.97543500  | 4.38925000  |
| C | -2.47641800 | 2.66388400  | 3.73375800  |
| H | -3.12859800 | 1.95006200  | 3.21036400  |
| H | -3.08010900 | 3.16853300  | 4.50249700  |
| H | -2.15140400 | 3.41976500  | 3.00364900  |
| C | -1.78589500 | 0.93742900  | 5.40154200  |
| H | -2.41093500 | 1.42823600  | 6.16354400  |
| H | -2.39523800 | 0.16715500  | 4.90335200  |
| H | -0.95713500 | 0.43257700  | 5.92030700  |
| C | -0.43026100 | 3.04118200  | 5.09752300  |
| H | 0.41501900  | 2.59785800  | 5.64444600  |
| H | -0.02857500 | 3.76381600  | 4.37141700  |
| H | -1.04941000 | 3.58659500  | 5.82641300  |
| H | -1.42436700 | 2.35187300  | -0.30321300 |
| C | -1.89674800 | 2.77556400  | -3.01147200 |
| C | -0.94445300 | 3.56868900  | -3.91981900 |
| H | -0.48186300 | 2.93106900  | -4.68791000 |
| H | -1.50162800 | 4.36667900  | -4.43438900 |
| H | -0.14262400 | 4.02823300  | -3.32530400 |
| C | -3.01395200 | 2.14270300  | -3.85109600 |
| H | -3.71827400 | 1.57541800  | -3.22370500 |
| H | -3.58669400 | 2.92798800  | -4.36744800 |
| H | -2.61819800 | 1.46062800  | -4.61834400 |
| C | -2.50490400 | 3.74624900  | -1.99708800 |
| H | -3.19246200 | 3.24644400  | -1.29914800 |
| H | -1.72514700 | 4.24662300  | -1.40489900 |
| H | -3.07726900 | 4.51971900  | -2.52974400 |
| P | 0.99499500  | 4.55099300  | 0.82270600  |
| F | 0.90953800  | 4.07321200  | -0.73932800 |
| F | 0.36210100  | 5.98948100  | 0.41487700  |
| F | -0.51893500 | 3.96991400  | 1.06688600  |
| F | 1.05867700  | 5.00453300  | 2.38507900  |
| F | 1.62452800  | 3.09801700  | 1.22033000  |

|   |             |             |             |
|---|-------------|-------------|-------------|
| F | 2.49282200  | 5.12991200  | 0.58181000  |
| C | -5.65002400 | 1.77310300  | 0.92380800  |
| C | -5.74251900 | 2.88934900  | 1.95718200  |
| H | -5.40529500 | 2.54993100  | 2.94641700  |
| H | -5.10245900 | 3.72848400  | 1.64737100  |
| H | -6.77231300 | 3.25963100  | 2.04814800  |
| C | -6.18712000 | 2.26338600  | -0.43499200 |
| H | -5.53629800 | 3.05820700  | -0.83076400 |
| H | -6.23511100 | 1.43819700  | -1.16192400 |
| H | -7.19016800 | 2.68964400  | -0.31358200 |
| C | -7.73815200 | 0.30927100  | 1.89450500  |
| N | -4.22650500 | 1.50346800  | 0.70782900  |
| C | -3.79349800 | 0.57752000  | -0.19080200 |
| C | -3.23623200 | -0.69137100 | 0.09215100  |
| C | -3.18328600 | -1.25324200 | 1.39663200  |
| C | -2.71229200 | -1.46267100 | -0.98091000 |
| C | -2.71654500 | -2.54491400 | 1.58853900  |
| C | -2.24145100 | -2.74704000 | -0.77444500 |
| C | -2.26394500 | -3.31180000 | 0.50688500  |
| H | -2.70458500 | -2.96814200 | 2.59579300  |
| H | -1.86190900 | -3.32674600 | -1.62011100 |
| C | -6.29072400 | 0.43466200  | 1.36463100  |
| H | -5.64059800 | 0.00897200  | 2.14659600  |
| H | -6.19426500 | -0.23450400 | 0.49505500  |
| C | -8.02612600 | -1.19823200 | 1.93776700  |
| H | -9.02147000 | -1.39345900 | 2.36680700  |
| H | -8.00264400 | -1.63954400 | 0.92883600  |
| H | -7.28139500 | -1.72845000 | 2.55273500  |
| C | -7.88459400 | 0.84967900  | 3.32110100  |
| H | -7.13409800 | 0.40220700  | 3.99225200  |
| H | -7.77681600 | 1.94072500  | 3.37333800  |
| H | -8.88082700 | 0.59895000  | 3.71896800  |
| C | -8.77744700 | 0.96990100  | 0.98703400  |
| H | -8.70887600 | 2.06733500  | 1.01045700  |
| H | -8.66858400 | 0.64197200  | -0.05842300 |
| H | -9.79231300 | 0.70047600  | 1.32029800  |
| H | -3.76776800 | 0.92019600  | -1.23232700 |
| N | -5.53521900 | -2.99925600 | -2.22963800 |
| C | -5.83055100 | -1.76787100 | -2.78844700 |
| N | -5.32628500 | -1.57084700 | -4.06134300 |
| N | -6.51939600 | -0.83562400 | -2.21943600 |
| H | -6.98051900 | -1.19795800 | -1.38636600 |
| C | -5.73283100 | -3.18384800 | -0.81691900 |

|   |             |             |             |
|---|-------------|-------------|-------------|
| H | -5.11288300 | -4.02428300 | -0.47210900 |
| H | -5.40836900 | -2.29140000 | -0.26541800 |
| H | -6.78622400 | -3.40848400 | -0.55299200 |
| C | -5.58092700 | -4.21174900 | -3.01479600 |
| H | -5.65698900 | -3.96948600 | -4.08087900 |
| H | -4.68070800 | -4.82975200 | -2.85512600 |
| H | -6.46228200 | -4.82167300 | -2.74229100 |
| C | -3.98189600 | -1.97147000 | -4.40517600 |
| H | -3.94844500 | -2.44170300 | -5.40225500 |
| H | -3.29974900 | -1.09977900 | -4.42267700 |
| H | -3.59572800 | -2.68500000 | -3.66915000 |
| C | -5.84557200 | -0.47211600 | -4.83395300 |
| H | -5.70566300 | -0.68499300 | -5.90551000 |
| H | -6.91419300 | -0.34445400 | -4.62496300 |
| H | -5.34266700 | 0.48630500  | -4.60630700 |
| H | -2.70938400 | -1.03107400 | -1.98371000 |
| H | -3.52515900 | -0.66423900 | 2.25025300  |
| H | -1.93128200 | -4.33799200 | 0.66256100  |

0 3

|    |            |             |             |
|----|------------|-------------|-------------|
| Ir | 2.40410200 | -0.88976700 | -0.08856300 |
| C  | 4.74025300 | 3.29542700  | -0.58453600 |
| C  | 3.69581400 | 3.00239400  | -1.45950800 |
| C  | 3.01261400 | 1.81062100  | -1.29859900 |
| C  | 4.43772900 | 1.12652100  | 0.42662200  |
| C  | 5.11023100 | 2.35473300  | 0.36055300  |
| H  | 5.27278100 | 4.24573500  | -0.65085700 |
| H  | 2.16455700 | 1.56846600  | -1.93581700 |
| H  | 5.93912700 | 2.54900800  | 1.03514400  |
| C  | 4.36052200 | -2.36308500 | 1.73976000  |
| C  | 4.01491300 | -1.19369600 | 1.05473600  |
| C  | 4.80151400 | -0.02189200 | 1.24850000  |
| C  | 5.87641000 | -0.07161400 | 2.14794000  |
| C  | 6.21316900 | -1.22198300 | 2.84187000  |
| C  | 5.44154700 | -2.35545700 | 2.61171000  |
| H  | 3.80351200 | -3.29346300 | 1.62061100  |
| H  | 7.05427200 | -1.23173600 | 3.53447700  |
| N  | 3.36479100 | 0.90471300  | -0.38181100 |
| F  | 6.62397300 | 1.01171600  | 2.36900600  |
| F  | 5.75600900 | -3.47434000 | 3.26076900  |
| C  | 3.36372500 | 3.92794500  | -2.59285300 |
| F  | 2.27272400 | 3.53664100  | -3.25595100 |
| F  | 4.37187800 | 3.94847100  | -3.48188000 |



|   |             |             |             |
|---|-------------|-------------|-------------|
| F | 3.18181900  | 5.18334500  | -2.19640400 |
| C | -1.09062700 | 1.67735000  | -2.32860800 |
| C | -0.41578700 | 0.69545900  | -3.06974100 |
| C | 0.44083200  | -0.19000200 | -2.43112300 |
| C | -0.09344100 | 0.68387200  | -0.36086400 |
| C | -0.94449000 | 1.61858300  | -0.94374800 |
| H | -0.50325800 | 0.64250000  | -4.15604500 |
| H | 1.03180200  | -0.91472900 | -2.99517600 |
| C | -0.40888800 | 1.27257500  | 3.35903100  |
| C | -0.72895200 | 1.23743000  | 2.00333500  |
| C | 0.14025700  | 0.64610500  | 1.09120900  |
| C | 1.58489900  | 0.03626900  | 2.78803700  |
| C | 0.78495800  | 0.64403200  | 3.74021300  |
| H | -1.64789100 | 1.68860100  | 1.63675100  |
| H | 2.51585300  | -0.46443300 | 3.06320800  |
| H | 1.10912400  | 0.62467000  | 4.78156600  |
| N | 0.63907200  | -0.16579900 | -1.10789800 |
| N | 1.26961400  | 0.03314600  | 1.48806200  |
| C | 3.24938800  | -3.89406600 | -2.93460600 |
| C | 4.05885100  | -3.33412600 | -3.90715900 |
| C | 4.44755600  | -2.00919900 | -3.72950100 |
| C | 4.04781500  | -1.24835700 | -2.63943200 |
| C | 3.21765300  | -1.81400000 | -1.66586900 |
| C | 2.81925700  | -3.17472000 | -1.80915000 |
| H | 4.37792700  | -3.91354400 | -4.77305000 |
| H | 4.39513800  | -0.21619700 | -2.57270100 |
| C | 0.98453800  | -5.42678600 | 0.62700300  |
| C | 1.63856600  | -5.04726600 | -0.53190600 |
| C | 2.01409900  | -3.70760200 | -0.72067600 |
| C | 1.02361900  | -3.13952500 | 1.32614600  |
| C | 0.68197400  | -4.45555100 | 1.58420400  |
| H | 0.71846500  | -6.47364200 | 0.78770100  |
| H | 1.89697500  | -5.78646400 | -1.28516600 |
| H | 0.78219900  | -2.34820600 | 2.03382000  |
| F | 5.23301100  | -1.45735900 | -4.65086500 |
| F | 2.87660400  | -5.16479200 | -3.10588300 |
| N | 1.67532200  | -2.77795300 | 0.21696500  |
| C | 0.02049200  | -4.83208200 | 2.87742700  |
| F | 0.81106200  | -5.61425400 | 3.61718000  |
| F | -1.11191000 | -5.51641200 | 2.66752700  |
| F | -0.28796900 | -3.76137600 | 3.61212600  |
| C | -1.28124500 | 1.97543500  | 4.38925000  |
| C | -2.47641800 | 2.66388400  | 3.73375800  |

|   |             |            |             |
|---|-------------|------------|-------------|
| H | -3.12859800 | 1.95006200 | 3.21036400  |
| H | -3.08010900 | 3.16853300 | 4.50249700  |
| H | -2.15140400 | 3.41976500 | 3.00364900  |
| C | -1.78589500 | 0.93742900 | 5.40154200  |
| H | -2.41093500 | 1.42823600 | 6.16354400  |
| H | -2.39523800 | 0.16715500 | 4.90335200  |
| H | -0.95713500 | 0.43257700 | 5.92030700  |
| C | -0.43026100 | 3.04118200 | 5.09752300  |
| H | 0.41501900  | 2.59785800 | 5.64444600  |
| H | -0.02857500 | 3.76381600 | 4.37141700  |
| H | -1.04941000 | 3.58659500 | 5.82641300  |
| H | -1.42436700 | 2.35187300 | -0.30321300 |
| C | -1.89674800 | 2.77556400 | -3.01147200 |
| C | -0.94445300 | 3.56868900 | -3.91981900 |
| H | -0.48186300 | 2.93106900 | -4.68791000 |
| H | -1.50162800 | 4.36667900 | -4.43438900 |
| H | -0.14262400 | 4.02823300 | -3.32530400 |
| C | -3.01395200 | 2.14270300 | -3.85109600 |
| H | -3.71827400 | 1.57541800 | -3.22370500 |
| H | -3.58669400 | 2.92798800 | -4.36744800 |
| H | -2.61819800 | 1.46062800 | -4.61834400 |
| C | -2.50490400 | 3.74624900 | -1.99708800 |
| H | -3.19246200 | 3.24644400 | -1.29914800 |
| H | -1.72514700 | 4.24662300 | -1.40489900 |
| H | -3.07726900 | 4.51971900 | -2.52974400 |
| P | 0.99499500  | 4.55099300 | 0.82270600  |
| F | 0.90953800  | 4.07321200 | -0.73932800 |
| F | 0.36210100  | 5.98948100 | 0.41487700  |
| F | -0.51893500 | 3.96991400 | 1.06688600  |
| F | 1.05867700  | 5.00453300 | 2.38507900  |
| F | 1.62452800  | 3.09801700 | 1.22033000  |
| F | 2.49282200  | 5.12991200 | 0.58181000  |
| C | -5.65002400 | 1.77310300 | 0.92380800  |
| C | -5.74251900 | 2.88934900 | 1.95718200  |
| H | -5.40529500 | 2.54993100 | 2.94641700  |
| H | -5.10245900 | 3.72848400 | 1.64737100  |
| H | -6.77231300 | 3.25963100 | 2.04814800  |
| C | -6.18712000 | 2.26338600 | -0.43499200 |
| H | -5.53629800 | 3.05820700 | -0.83076400 |
| H | -6.23511100 | 1.43819700 | -1.16192400 |
| H | -7.19016800 | 2.68964400 | -0.31358200 |
| C | -7.73815200 | 0.30927100 | 1.89450500  |
| N | -4.22650500 | 1.50346800 | 0.70782900  |

|   |             |             |             |
|---|-------------|-------------|-------------|
| C | -3.79349800 | 0.57752000  | -0.19080200 |
| C | -3.23623200 | -0.69137100 | 0.09215100  |
| C | -3.18328600 | -1.25324200 | 1.39663200  |
| C | -2.71229200 | -1.46267100 | -0.98091000 |
| C | -2.71654500 | -2.54491400 | 1.58853900  |
| C | -2.24145100 | -2.74704000 | -0.77444500 |
| C | -2.26394500 | -3.31180000 | 0.50688500  |
| H | -2.70458500 | -2.96814200 | 2.59579300  |
| H | -1.86190900 | -3.32674600 | -1.62011100 |
| C | -6.29072400 | 0.43466200  | 1.36463100  |
| H | -5.64059800 | 0.00897200  | 2.14659600  |
| H | -6.19426500 | -0.23450400 | 0.49505500  |
| C | -8.02612600 | -1.19823200 | 1.93776700  |
| H | -9.02147000 | -1.39345900 | 2.36680700  |
| H | -8.00264400 | -1.63954400 | 0.92883600  |
| H | -7.28139500 | -1.72845000 | 2.55273500  |
| C | -7.88459400 | 0.84967900  | 3.32110100  |
| H | -7.13409800 | 0.40220700  | 3.99225200  |
| H | -7.77681600 | 1.94072500  | 3.37333800  |
| H | -8.88082700 | 0.59895000  | 3.71896800  |
| C | -8.77744700 | 0.96990100  | 0.98703400  |
| H | -8.70887600 | 2.06733500  | 1.01045700  |
| H | -8.66858400 | 0.64197200  | -0.05842300 |
| H | -9.79231300 | 0.70047600  | 1.32029800  |
| H | -3.76776800 | 0.92019600  | -1.23232700 |
| N | -5.53521900 | -2.99925600 | -2.22963800 |
| C | -5.83055100 | -1.76787100 | -2.78844700 |
| N | -5.32628500 | -1.57084700 | -4.06134300 |
| N | -6.51939600 | -0.83562400 | -2.21943600 |
| H | -6.98051900 | -1.19795800 | -1.38636600 |
| C | -5.73283100 | -3.18384800 | -0.81691900 |
| H | -5.11288300 | -4.02428300 | -0.47210900 |
| H | -5.40836900 | -2.29140000 | -0.26541800 |
| H | -6.78622400 | -3.40848400 | -0.55299200 |
| C | -5.58092700 | -4.21174900 | -3.01479600 |
| H | -5.65698900 | -3.96948600 | -4.08087900 |
| H | -4.68070800 | -4.82975200 | -2.85512600 |
| H | -6.46228200 | -4.82167300 | -2.74229100 |
| C | -3.98189600 | -1.97147000 | -4.40517600 |
| H | -3.94844500 | -2.44170300 | -5.40225500 |
| H | -3.29974900 | -1.09977900 | -4.42267700 |
| H | -3.59572800 | -2.68500000 | -3.66915000 |
| C | -5.84557200 | -0.47211600 | -4.83395300 |

|   |             |             |             |
|---|-------------|-------------|-------------|
| H | -5.70566300 | -0.68499300 | -5.90551000 |
| H | -6.91419300 | -0.34445400 | -4.62496300 |
| H | -5.34266700 | 0.48630500  | -4.60630700 |
| H | -2.70938400 | -1.03107400 | -1.98371000 |
| H | -3.52515900 | -0.66423900 | 2.25025300  |
| H | -1.93128200 | -4.33799200 | 0.66256100  |

**SET3**

M5-M7

0 2

|   |             |             |             |
|---|-------------|-------------|-------------|
| C | -2.13108500 | 0.75354700  | -1.27070300 |
| H | -1.18295000 | 1.31106200  | -1.28494500 |
| H | -2.54006900 | 0.75704900  | -2.29244700 |
| H | -2.82427100 | 1.29929400  | -0.61660000 |
| C | -0.79804100 | -1.29661500 | -1.68116600 |
| H | 0.13947000  | -0.72484100 | -1.63391600 |
| H | -0.58203300 | -2.33547800 | -1.38320200 |
| H | -1.12539900 | -1.31002600 | -2.73262900 |
| C | -1.38604100 | -0.68641400 | 0.68670900  |
| H | -2.21503800 | -0.42361800 | 1.34837800  |
| H | -1.08710700 | -1.71553700 | 0.93695700  |
| C | -0.27018500 | 0.24504100  | 0.99252400  |
| C | -0.46782200 | 1.52690200  | 1.65865700  |
| O | 0.43447400  | 2.25054100  | 2.03785100  |
| O | -1.76193100 | 1.82888200  | 1.82133100  |
| C | -2.04032600 | 3.06068400  | 2.46418500  |
| H | -1.64898900 | 3.90380200  | 1.87580700  |
| H | -3.13136000 | 3.12805200  | 2.53814000  |
| H | -1.58939900 | 3.09089700  | 3.46646500  |
| N | 1.04827900  | -0.05622300 | 0.64743100  |
| C | 1.91904700  | 0.94496400  | 0.12955600  |
| C | 1.54139800  | -1.36250100 | 0.84859800  |
| O | 3.09434600  | 0.98243400  | 0.37210300  |
| O | 1.10078800  | -2.09576700 | 1.69804200  |
| O | 1.23462700  | 1.74990700  | -0.66031600 |
| O | 2.46438900  | -1.63925500 | -0.04704800 |
| C | 1.82605200  | 2.96088000  | -1.23289000 |
| C | 3.29378400  | -2.84099000 | 0.03271400  |
| C | 2.42500900  | -4.07092700 | -0.18475600 |
| H | 3.06470000  | -4.96304800 | -0.25065300 |
| H | 1.71497200  | -4.20614200 | 0.64044900  |
| H | 1.86475900  | -3.97942400 | -1.12729700 |
| C | 4.02277100  | -2.86641400 | 1.36781000  |

|      |             |             |             |
|------|-------------|-------------|-------------|
| H    | 3.32525900  | -3.00644100 | 2.20335900  |
| H    | 4.74411600  | -3.69606900 | 1.37237400  |
| H    | 4.57469500  | -1.92658200 | 1.51613800  |
| C    | 4.26921700  | -2.64950900 | -1.11644000 |
| H    | 4.96337500  | -3.49999100 | -1.16543900 |
| H    | 3.72973300  | -2.58163400 | -2.07233100 |
| H    | 4.84998400  | -1.72654100 | -0.97648000 |
| C    | 2.38059200  | 3.85042300  | -0.12986900 |
| H    | 3.26229100  | 3.40163200  | 0.34369400  |
| H    | 2.66946500  | 4.81855600  | -0.56393200 |
| H    | 1.61622800  | 4.01973700  | 0.64097500  |
| C    | 2.88597100  | 2.55727800  | -2.24673700 |
| H    | 3.27301400  | 3.45544700  | -2.74953700 |
| H    | 3.72218500  | 2.04132600  | -1.75807100 |
| H    | 2.45321600  | 1.89458600  | -3.01099400 |
| C    | 0.64086100  | 3.62447000  | -1.91424600 |
| H    | 0.96441200  | 4.55184000  | -2.40731500 |
| H    | 0.20618600  | 2.95854600  | -2.67360100 |
| H    | -0.13727700 | 3.87240800  | -1.17768300 |
| C    | -1.88414700 | -0.67717200 | -0.79224300 |
| C    | -3.12202900 | -1.59923700 | -0.90300000 |
| H    | -3.20857900 | -1.89207300 | -1.96430300 |
| H    | -2.85886600 | -2.53035900 | -0.36978900 |
| C    | -4.55286100 | -1.20117600 | -0.45983400 |
| C    | -5.37654100 | -2.49631000 | -0.49322400 |
| H    | -6.42912900 | -2.29828200 | -0.23533300 |
| H    | -5.35535000 | -2.95456700 | -1.49520100 |
| H    | -4.98508400 | -3.23563400 | 0.22363500  |
| C    | -4.63229400 | -0.62440200 | 0.95602900  |
| H    | -4.20634300 | -1.31642200 | 1.69961100  |
| H    | -4.10890600 | 0.33903400  | 1.04543100  |
| H    | -5.68570000 | -0.45313500 | 1.23063600  |
| C    | -5.20328300 | -0.21681500 | -1.43972800 |
| H    | -4.74001800 | 0.77737300  | -1.40775700 |
| H    | -5.13720500 | -0.58815400 | -2.47498000 |
| H    | -6.27077100 | -0.09126800 | -1.19702300 |
| -1 1 |             |             |             |
| C    | -2.13108500 | 0.75354700  | -1.27070300 |
| H    | -1.18295000 | 1.31106200  | -1.28494500 |
| H    | -2.54006900 | 0.75704900  | -2.29244700 |
| H    | -2.82427100 | 1.29929400  | -0.61660000 |
| C    | -0.79804100 | -1.29661500 | -1.68116600 |
| H    | 0.13947000  | -0.72484100 | -1.63391600 |

|   |             |             |             |
|---|-------------|-------------|-------------|
| H | -0.58203300 | -2.33547800 | -1.38320200 |
| H | -1.12539900 | -1.31002600 | -2.73262900 |
| C | -1.38604100 | -0.68641400 | 0.68670900  |
| H | -2.21503800 | -0.42361800 | 1.34837800  |
| H | -1.08710700 | -1.71553700 | 0.93695700  |
| C | -0.27018500 | 0.24504100  | 0.99252400  |
| C | -0.46782200 | 1.52690200  | 1.65865700  |
| O | 0.43447400  | 2.25054100  | 2.03785100  |
| O | -1.76193100 | 1.82888200  | 1.82133100  |
| C | -2.04032600 | 3.06068400  | 2.46418500  |
| H | -1.64898900 | 3.90380200  | 1.87580700  |
| H | -3.13136000 | 3.12805200  | 2.53814000  |
| H | -1.58939900 | 3.09089700  | 3.46646500  |
| N | 1.04827900  | -0.05622300 | 0.64743100  |
| C | 1.91904700  | 0.94496400  | 0.12955600  |
| C | 1.54139800  | -1.36250100 | 0.84859800  |
| O | 3.09434600  | 0.98243400  | 0.37210300  |
| O | 1.10078800  | -2.09576700 | 1.69804200  |
| O | 1.23462700  | 1.74990700  | -0.66031600 |
| O | 2.46438900  | -1.63925500 | -0.04704800 |
| C | 1.82605200  | 2.96088000  | -1.23289000 |
| C | 3.29378400  | -2.84099000 | 0.03271400  |
| C | 2.42500900  | -4.07092700 | -0.18475600 |
| H | 3.06470000  | -4.96304800 | -0.25065300 |
| H | 1.71497200  | -4.20614200 | 0.64044900  |
| H | 1.86475900  | -3.97942400 | -1.12729700 |
| C | 4.02277100  | -2.86641400 | 1.36781000  |
| H | 3.32525900  | -3.00644100 | 2.20335900  |
| H | 4.74411600  | -3.69606900 | 1.37237400  |
| H | 4.57469500  | -1.92658200 | 1.51613800  |
| C | 4.26921700  | -2.64950900 | -1.11644000 |
| H | 4.96337500  | -3.49999100 | -1.16543900 |
| H | 3.72973300  | -2.58163400 | -2.07233100 |
| H | 4.84998400  | -1.72654100 | -0.97648000 |
| C | 2.38059200  | 3.85042300  | -0.12986900 |
| H | 3.26229100  | 3.40163200  | 0.34369400  |
| H | 2.66946500  | 4.81855600  | -0.56393200 |
| H | 1.61622800  | 4.01973700  | 0.64097500  |
| C | 2.88597100  | 2.55727800  | -2.24673700 |
| H | 3.27301400  | 3.45544700  | -2.74953700 |
| H | 3.72218500  | 2.04132600  | -1.75807100 |
| H | 2.45321600  | 1.89458600  | -3.01099400 |
| C | 0.64086100  | 3.62447000  | -1.91424600 |

|   |             |             |             |
|---|-------------|-------------|-------------|
| H | 0.96441200  | 4.55184000  | -2.40731500 |
| H | 0.20618600  | 2.95854600  | -2.67360100 |
| H | -0.13727700 | 3.87240800  | -1.17768300 |
| C | -1.88414700 | -0.67717200 | -0.79224300 |
| C | -3.12202900 | -1.59923700 | -0.90300000 |
| H | -3.20857900 | -1.89207300 | -1.96430300 |
| H | -2.85886600 | -2.53035900 | -0.36978900 |
| C | -4.55286100 | -1.20117600 | -0.45983400 |
| C | -5.37654100 | -2.49631000 | -0.49322400 |
| H | -6.42912900 | -2.29828200 | -0.23533300 |
| H | -5.35535000 | -2.95456700 | -1.49520100 |
| H | -4.98508400 | -3.23563400 | 0.22363500  |
| C | -4.63229400 | -0.62440200 | 0.95602900  |
| H | -4.20634300 | -1.31642200 | 1.69961100  |
| H | -4.10890600 | 0.33903400  | 1.04543100  |
| H | -5.68570000 | -0.45313500 | 1.23063600  |
| C | -5.20328300 | -0.21681500 | -1.43972800 |
| H | -4.74001800 | 0.77737300  | -1.40775700 |
| H | -5.13720500 | -0.58815400 | -2.47498000 |
| H | -6.27077100 | -0.09126800 | -1.19702300 |

**Ir(II)-Ir(III)**

-1 2

|    |             |             |             |
|----|-------------|-------------|-------------|
| Ir | 1.43810800  | -0.36770400 | -0.08642700 |
| C  | -1.41285800 | -3.52711200 | -2.31850500 |
| C  | -1.74824300 | -3.09391200 | -1.03444500 |
| C  | -0.92751900 | -2.16840300 | -0.41166500 |
| C  | 0.55199000  | -2.12696900 | -2.23299800 |
| C  | -0.26551900 | -3.03787600 | -2.91919600 |
| H  | -2.04563600 | -4.24351600 | -2.84603400 |
| H  | -1.16125900 | -1.77494500 | 0.57682500  |
| H  | 0.01357400  | -3.36197000 | -3.91789200 |
| C  | 3.69920100  | -0.12925600 | -2.14376500 |
| C  | 2.46920700  | -0.69020400 | -1.77778300 |
| C  | 1.81332700  | -1.56124700 | -2.69642500 |
| C  | 2.41378900  | -1.81398700 | -3.93839900 |
| C  | 3.62507000  | -1.25329800 | -4.30708400 |
| C  | 4.24666300  | -0.41483900 | -3.38612100 |
| H  | 4.24584400  | 0.53937000  | -1.47562000 |
| H  | 4.06788000  | -1.46552400 | -5.27977700 |
| N  | 0.18750600  | -1.70895900 | -0.98812000 |
| F  | 1.82236400  | -2.61973300 | -4.82708100 |
| F  | 5.41579000  | 0.13107700  | -3.72391700 |

|   |             |             |             |
|---|-------------|-------------|-------------|
| C | -2.92694900 | -3.67438600 | -0.31030700 |
| F | -3.29025500 | -2.94160000 | 0.73741400  |
| F | -2.63522000 | -4.90386200 | 0.15333600  |
| F | -3.97983200 | -3.81437800 | -1.11548900 |
| C | -2.06933500 | 0.32484100  | 3.29655700  |
| C | -0.94528600 | -0.49946400 | 3.61499800  |
| C | 0.07399500  | -0.62981900 | 2.69813600  |
| C | -0.94723300 | 0.85657400  | 1.19171200  |
| C | -2.03787200 | 0.99340200  | 2.09410200  |
| H | -0.88693200 | -1.05267300 | 4.55268100  |
| H | 0.92649200  | -1.28609800 | 2.89484200  |
| C | -1.69124900 | 3.05616700  | -1.77594000 |
| C | -1.81023500 | 2.46549500  | -0.53847300 |
| C | -0.86511500 | 1.51302000  | -0.07020800 |
| C | 0.32173300  | 1.74891000  | -2.08214300 |
| C | -0.56796300 | 2.67880000  | -2.57274700 |
| H | -2.65905400 | 2.69788600  | 0.09885300  |
| H | 1.18589700  | 1.43257100  | -2.67269500 |
| H | -0.40272100 | 3.09567500  | -3.56656600 |
| N | 0.08755000  | -0.00110300 | 1.51265000  |
| N | 0.20142800  | 1.17351500  | -0.87617400 |
| C | 4.49689200  | -2.01871300 | 2.32749300  |
| C | 4.32536700  | -3.39181000 | 2.34359000  |
| C | 3.26725100  | -3.91164500 | 1.60164500  |
| C | 2.40218600  | -3.11426400 | 0.86737800  |
| C | 2.57469800  | -1.72430000 | 0.85659200  |
| C | 3.65239400  | -1.16343400 | 1.60382100  |
| H | 4.99430800  | -4.03419500 | 2.91551800  |
| H | 1.59540700  | -3.59531200 | 0.31079100  |
| C | 4.70774200  | 2.46056800  | 2.00690800  |
| C | 4.73627200  | 1.08671700  | 2.16435500  |
| C | 3.76470000  | 0.28666000  | 1.54065000  |
| C | 2.76668700  | 2.20547800  | 0.62945300  |
| C | 3.70034200  | 3.03558500  | 1.22619700  |
| H | 5.46475300  | 3.08319900  | 2.48822700  |
| H | 5.50834500  | 0.61788600  | 2.76828300  |
| H | 1.96019500  | 2.59765600  | 0.00923600  |
| F | 3.09025000  | -5.23294000 | 1.60604300  |
| F | 5.51321600  | -1.52310500 | 3.04204500  |
| N | 2.80158800  | 0.87709300  | 0.77749000  |
| C | 3.62996900  | 4.52270700  | 1.04719700  |
| F | 4.77725900  | 5.00786700  | 0.55779300  |
| F | 3.41555400  | 5.14573900  | 2.21180500  |



|     |             |             |             |
|-----|-------------|-------------|-------------|
| F   | 2.65240600  | 4.88183000  | 0.21424500  |
| C   | -2.71630800 | 4.03969100  | -2.32942400 |
| C   | -3.78907500 | 4.39212000  | -1.29859100 |
| H   | -3.35106400 | 4.87368900  | -0.41016600 |
| H   | -4.50929600 | 5.09753700  | -1.74103100 |
| H   | -4.34223900 | 3.50145100  | -0.96961800 |
| C   | -2.00987500 | 5.33077900  | -2.76558100 |
| H   | -2.74329000 | 6.04551200  | -3.17169700 |
| H   | -1.50407500 | 5.80925500  | -1.91212900 |
| H   | -1.25635300 | 5.14726700  | -3.54579400 |
| C   | -3.40030100 | 3.38474500  | -3.54037500 |
| H   | -2.67201200 | 3.12214900  | -4.32261600 |
| H   | -3.92380200 | 2.46792100  | -3.23201200 |
| H   | -4.13695400 | 4.07534500  | -3.98218000 |
| H   | -2.88644200 | 1.59631100  | 1.78048900  |
| C   | -3.26033900 | 0.38110000  | 4.24605200  |
| C   | -3.90040200 | -1.01635500 | 4.28817900  |
| H   | -3.18507700 | -1.77839800 | 4.63336400  |
| H   | -4.76122000 | -1.02314300 | 4.97645900  |
| H   | -4.25416600 | -1.30275000 | 3.28676700  |
| C   | -2.78365000 | 0.77714600  | 5.65016100  |
| H   | -2.31567300 | 1.77413800  | 5.63937700  |
| H   | -3.63744500 | 0.80893500  | 6.34564800  |
| H   | -2.05083200 | 0.06380000  | 6.05548900  |
| C   | -4.31681100 | 1.38512000  | 3.78408100  |
| H   | -3.90486500 | 2.40479600  | 3.72473300  |
| H   | -4.72363600 | 1.11770700  | 2.79933200  |
| H   | -5.15017300 | 1.40168200  | 4.50351600  |
| P   | -5.14760500 | 0.05905400  | -0.45263200 |
| F   | -3.56331700 | -0.28892000 | -0.58206000 |
| F   | -5.19678400 | -0.66229900 | 1.00827300  |
| F   | -4.78289700 | 1.48394500  | 0.27487700  |
| F   | -6.73015500 | 0.41778800  | -0.32437200 |
| F   | -5.10290900 | 0.80004000  | -1.90659800 |
| F   | -5.52205300 | -1.34762500 | -1.17360700 |
| 0 1 |             |             |             |
| Ir  | 1.43810800  | -0.36770400 | -0.08642700 |
| C   | -1.41285800 | -3.52711200 | -2.31850500 |
| C   | -1.74824300 | -3.09391200 | -1.03444500 |
| C   | -0.92751900 | -2.16840300 | -0.41166500 |
| C   | 0.55199000  | -2.12696900 | -2.23299800 |
| C   | -0.26551900 | -3.03787600 | -2.91919600 |
| H   | -2.04563600 | -4.24351600 | -2.84603400 |

|   |             |             |             |
|---|-------------|-------------|-------------|
| H | -1.16125900 | -1.77494500 | 0.57682500  |
| H | 0.01357400  | -3.36197000 | -3.91789200 |
| C | 3.69920100  | -0.12925600 | -2.14376500 |
| C | 2.46920700  | -0.69020400 | -1.77778300 |
| C | 1.81332700  | -1.56124700 | -2.69642500 |
| C | 2.41378900  | -1.81398700 | -3.93839900 |
| C | 3.62507000  | -1.25329800 | -4.30708400 |
| C | 4.24666300  | -0.41483900 | -3.38612100 |
| H | 4.24584400  | 0.53937000  | -1.47562000 |
| H | 4.06788000  | -1.46552400 | -5.27977700 |
| N | 0.18750600  | -1.70895900 | -0.98812000 |
| F | 1.82236400  | -2.61973300 | -4.82708100 |
| F | 5.41579000  | 0.13107700  | -3.72391700 |
| C | -2.92694900 | -3.67438600 | -0.31030700 |
| F | -3.29025500 | -2.94160000 | 0.73741400  |
| F | -2.63522000 | -4.90386200 | 0.15333600  |
| F | -3.97983200 | -3.81437800 | -1.11548900 |
| C | -2.06933500 | 0.32484100  | 3.29655700  |
| C | -0.94528600 | -0.49946400 | 3.61499800  |
| C | 0.07399500  | -0.62981900 | 2.69813600  |
| C | -0.94723300 | 0.85657400  | 1.19171200  |
| C | -2.03787200 | 0.99340200  | 2.09410200  |
| H | -0.88693200 | -1.05267300 | 4.55268100  |
| H | 0.92649200  | -1.28609800 | 2.89484200  |
| C | -1.69124900 | 3.05616700  | -1.77594000 |
| C | -1.81023500 | 2.46549500  | -0.53847300 |
| C | -0.86511500 | 1.51302000  | -0.07020800 |
| C | 0.32173300  | 1.74891000  | -2.08214300 |
| C | -0.56796300 | 2.67880000  | -2.57274700 |
| H | -2.65905400 | 2.69788600  | 0.09885300  |
| H | 1.18589700  | 1.43257100  | -2.67269500 |
| H | -0.40272100 | 3.09567500  | -3.56656600 |
| N | 0.08755000  | -0.00110300 | 1.51265000  |
| N | 0.20142800  | 1.17351500  | -0.87617400 |
| C | 4.49689200  | -2.01871300 | 2.32749300  |
| C | 4.32536700  | -3.39181000 | 2.34359000  |
| C | 3.26725100  | -3.91164500 | 1.60164500  |
| C | 2.40218600  | -3.11426400 | 0.86737800  |
| C | 2.57469800  | -1.72430000 | 0.85659200  |
| C | 3.65239400  | -1.16343400 | 1.60382100  |
| H | 4.99430800  | -4.03419500 | 2.91551800  |
| H | 1.59540700  | -3.59531200 | 0.31079100  |
| C | 4.70774200  | 2.46056800  | 2.00690800  |

|   |             |             |             |
|---|-------------|-------------|-------------|
| C | 4.73627200  | 1.08671700  | 2.16435500  |
| C | 3.76470000  | 0.28666000  | 1.54065000  |
| C | 2.76668700  | 2.20547800  | 0.62945300  |
| C | 3.70034200  | 3.03558500  | 1.22619700  |
| H | 5.46475300  | 3.08319900  | 2.48822700  |
| H | 5.50834500  | 0.61788600  | 2.76828300  |
| H | 1.96019500  | 2.59765600  | 0.00923600  |
| F | 3.09025000  | -5.23294000 | 1.60604300  |
| F | 5.51321600  | -1.52310500 | 3.04204500  |
| N | 2.80158800  | 0.87709300  | 0.77749000  |
| C | 3.62996900  | 4.52270700  | 1.04719700  |
| F | 4.77725900  | 5.00786700  | 0.55779300  |
| F | 3.41555400  | 5.14573900  | 2.21180500  |
| F | 2.65240600  | 4.88183000  | 0.21424500  |
| C | -2.71630800 | 4.03969100  | -2.32942400 |
| C | -3.78907500 | 4.39212000  | -1.29859100 |
| H | -3.35106400 | 4.87368900  | -0.41016600 |
| H | -4.50929600 | 5.09753700  | -1.74103100 |
| H | -4.34223900 | 3.50145100  | -0.96961800 |
| C | -2.00987500 | 5.33077900  | -2.76558100 |
| H | -2.74329000 | 6.04551200  | -3.17169700 |
| H | -1.50407500 | 5.80925500  | -1.91212900 |
| H | -1.25635300 | 5.14726700  | -3.54579400 |
| C | -3.40030100 | 3.38474500  | -3.54037500 |
| H | -2.67201200 | 3.12214900  | -4.32261600 |
| H | -3.92380200 | 2.46792100  | -3.23201200 |
| H | -4.13695400 | 4.07534500  | -3.98218000 |
| H | -2.88644200 | 1.59631100  | 1.78048900  |
| C | -3.26033900 | 0.38110000  | 4.24605200  |
| C | -3.90040200 | -1.01635500 | 4.28817900  |
| H | -3.18507700 | -1.77839800 | 4.63336400  |
| H | -4.76122000 | -1.02314300 | 4.97645900  |
| H | -4.25416600 | -1.30275000 | 3.28676700  |
| C | -2.78365000 | 0.77714600  | 5.65016100  |
| H | -2.31567300 | 1.77413800  | 5.63937700  |
| H | -3.63744500 | 0.80893500  | 6.34564800  |
| H | -2.05083200 | 0.06380000  | 6.05548900  |
| C | -4.31681100 | 1.38512000  | 3.78408100  |
| H | -3.90486500 | 2.40479600  | 3.72473300  |
| H | -4.72363600 | 1.11770700  | 2.79933200  |
| H | -5.15017300 | 1.40168200  | 4.50351600  |
| P | -5.14760500 | 0.05905400  | -0.45263200 |
| F | -3.56331700 | -0.28892000 | -0.58206000 |

|   |             |             |             |
|---|-------------|-------------|-------------|
| F | -5.19678400 | -0.66229900 | 1.00827300  |
| F | -4.78289700 | 1.48394500  | 0.27487700  |
| F | -6.73015500 | 0.41778800  | -0.32437200 |
| F | -5.10290900 | 0.80004000  | -1.90659800 |
| F | -5.52205300 | -1.34762500 | -1.17360700 |

**SET4**

Ra-<sup>2</sup>Sa

0 1

|   |             |             |             |
|---|-------------|-------------|-------------|
| C | -1.09679900 | 0.66761300  | 0.47986200  |
| C | -1.51081700 | 0.67709900  | 1.95380400  |
| H | -1.45717500 | -0.33318600 | 2.38332100  |
| H | -0.82592400 | 1.32567300  | 2.52150500  |
| H | -2.52959300 | 1.06708500  | 2.08471200  |
| C | -1.22590200 | 2.07974900  | -0.09155700 |
| H | -0.56491900 | 2.77977900  | 0.44356900  |
| H | -0.97157700 | 2.11544000  | -1.16196400 |
| H | -2.25129100 | 2.45146500  | 0.01569800  |
| C | -3.39722500 | -0.54551500 | -0.38593400 |
| N | 0.27444900  | 0.14999500  | 0.48074200  |
| C | 1.23256200  | 0.75456200  | -0.08884000 |
| H | 1.11239300  | 1.71743500  | -0.61761800 |
| C | 2.60467500  | 0.21634400  | -0.09578500 |
| C | 2.91378000  | -0.99840600 | 0.53432500  |
| C | 3.62237000  | 0.92675200  | -0.74444600 |
| C | 4.21403800  | -1.48890500 | 0.51311800  |
| C | 4.92676800  | 0.43479400  | -0.76592600 |
| C | 5.22449900  | -0.77369500 | -0.13737200 |
| H | 4.44744000  | -2.43603600 | 1.00583800  |
| H | 5.71347800  | 0.99640200  | -1.27525300 |
| C | -1.85913000 | -0.37813000 | -0.37566100 |
| H | -1.43573700 | -1.35889900 | -0.10220800 |
| H | -1.53363500 | -0.19959400 | -1.41559600 |
| C | -3.70229000 | -1.47374500 | -1.57028000 |
| H | -4.77915200 | -1.69956400 | -1.62334600 |
| H | -3.40505600 | -1.01142800 | -2.52499400 |
| H | -3.16104600 | -2.42879100 | -1.47546300 |
| C | -3.90972000 | -1.23389100 | 0.88455600  |
| H | -3.36397300 | -2.17231500 | 1.07240500  |
| H | -3.81074700 | -0.60274300 | 1.77708500  |
| H | -4.97747200 | -1.48338600 | 0.77563000  |
| C | -4.16205000 | 0.76227800  | -0.59796700 |
| H | -4.08341100 | 1.43461600  | 0.26913400  |

|     |             |             |             |
|-----|-------------|-------------|-------------|
| H   | -3.79997500 | 1.30352500  | -1.48594900 |
| H   | -5.23282900 | 0.55069100  | -0.74852400 |
| H   | 2.10894100  | -1.54021400 | 1.03548600  |
| H   | 6.24599100  | -1.16156200 | -0.15281000 |
| H   | 3.38556600  | 1.87422500  | -1.23725100 |
| 1 2 |             |             |             |
| C   | -1.09679900 | 0.66761300  | 0.47986200  |
| C   | -1.51081700 | 0.67709900  | 1.95380400  |
| H   | -1.45717500 | -0.33318600 | 2.38332100  |
| H   | -0.82592400 | 1.32567300  | 2.52150500  |
| H   | -2.52959300 | 1.06708500  | 2.08471200  |
| C   | -1.22590200 | 2.07974900  | -0.09155700 |
| H   | -0.56491900 | 2.77977900  | 0.44356900  |
| H   | -0.97157700 | 2.11544000  | -1.16196400 |
| H   | -2.25129100 | 2.45146500  | 0.01569800  |
| C   | -3.39722500 | -0.54551500 | -0.38593400 |
| N   | 0.27444900  | 0.14999500  | 0.48074200  |
| C   | 1.23256200  | 0.75456200  | -0.08884000 |
| H   | 1.11239300  | 1.71743500  | -0.61761800 |
| C   | 2.60467500  | 0.21634400  | -0.09578500 |
| C   | 2.91378000  | -0.99840600 | 0.53432500  |
| C   | 3.62237000  | 0.92675200  | -0.74444600 |
| C   | 4.21403800  | -1.48890500 | 0.51311800  |
| C   | 4.92676800  | 0.43479400  | -0.76592600 |
| C   | 5.22449900  | -0.77369500 | -0.13737200 |
| H   | 4.44744000  | -2.43603600 | 1.00583800  |
| H   | 5.71347800  | 0.99640200  | -1.27525300 |
| C   | -1.85913000 | -0.37813000 | -0.37566100 |
| H   | -1.43573700 | -1.35889900 | -0.10220800 |
| H   | -1.53363500 | -0.19959400 | -1.41559600 |
| C   | -3.70229000 | -1.47374500 | -1.57028000 |
| H   | -4.77915200 | -1.69956400 | -1.62334600 |
| H   | -3.40505600 | -1.01142800 | -2.52499400 |
| H   | -3.16104600 | -2.42879100 | -1.47546300 |
| C   | -3.90972000 | -1.23389100 | 0.88455600  |
| H   | -3.36397300 | -2.17231500 | 1.07240500  |
| H   | -3.81074700 | -0.60274300 | 1.77708500  |
| H   | -4.97747200 | -1.48338600 | 0.77563000  |
| C   | -4.16205000 | 0.76227800  | -0.59796700 |
| H   | -4.08341100 | 1.43461600  | 0.26913400  |
| H   | -3.79997500 | 1.30352500  | -1.48594900 |
| H   | -5.23282900 | 0.55069100  | -0.74852400 |
| H   | 2.10894100  | -1.54021400 | 1.03548600  |

|   |            |             |             |
|---|------------|-------------|-------------|
| H | 6.24599100 | -1.16156200 | -0.15281000 |
| H | 3.38556600 | 1.87422500  | -1.23725100 |

**Ir(III)\*-Ir(II)**

0 3

|    |             |             |             |
|----|-------------|-------------|-------------|
| Ir | 1.40318200  | -0.37401300 | -0.05211600 |
| C  | -0.83621300 | -4.32254200 | -1.66326200 |
| C  | -1.42325800 | -3.58895800 | -0.60636400 |
| C  | -0.80612500 | -2.43002300 | -0.17584200 |
| C  | 0.92035700  | -2.66529800 | -1.77116200 |
| C  | 0.32345900  | -3.85285000 | -2.23969600 |
| H  | -1.29516200 | -5.24572700 | -2.02092400 |
| H  | -1.23392000 | -1.83910300 | 0.63346000  |
| H  | 0.78848400  | -4.39373200 | -3.06024400 |
| C  | 3.60478700  | -0.06766700 | -2.08876000 |
| C  | 2.49998200  | -0.80157100 | -1.62365900 |
| C  | 2.09553300  | -2.01870600 | -2.28646600 |
| C  | 2.88512200  | -2.45170800 | -3.36931700 |
| C  | 3.97132200  | -1.73130600 | -3.82551300 |
| C  | 4.31557700  | -0.53517100 | -3.17555600 |
| H  | 3.92221700  | 0.85650400  | -1.60471600 |
| H  | 4.54938600  | -2.09222400 | -4.67701800 |
| N  | 0.33647300  | -1.98930700 | -0.71358300 |
| F  | 2.59013300  | -3.58864900 | -4.00060800 |
| F  | 5.36387400  | 0.14568600  | -3.63227700 |
| C  | -2.65984300 | -4.09853100 | 0.06319600  |
| F  | -3.09760200 | -3.28073300 | 1.01799800  |
| F  | -2.43208200 | -5.29331600 | 0.63928700  |
| F  | -3.65252900 | -4.28943300 | -0.81040100 |
| C  | -2.09305600 | 1.09710400  | 3.18093000  |
| C  | -1.03065800 | 0.28598200  | 3.60558600  |
| C  | -0.04906400 | -0.09586500 | 2.70892700  |
| C  | -1.06482600 | 1.07420000  | 0.98787300  |
| C  | -2.07131500 | 1.50583000  | 1.84824400  |
| H  | -0.96391600 | -0.07423600 | 4.63264300  |
| H  | 0.77890800  | -0.73891000 | 3.01303500  |
| C  | -1.94722100 | 2.44650300  | -2.43791500 |
| C  | -2.00613600 | 2.19029700  | -1.06827900 |
| C  | -1.03373000 | 1.41025300  | -0.44771800 |
| C  | 0.07077600  | 1.12269000  | -2.46202800 |
| C  | -0.86524200 | 1.88877600  | -3.13348900 |
| H  | -2.83948700 | 2.56203400  | -0.48055200 |
| H  | 0.92004800  | 0.67759100  | -2.98352900 |

|   |             |             |             |
|---|-------------|-------------|-------------|
| H | -0.74099100 | 2.03755400  | -4.20675500 |
| N | -0.07403100 | 0.27505400  | 1.42216300  |
| N | -0.00767100 | 0.89009300  | -1.14571000 |
| C | 4.45031300  | -1.31357400 | 2.66957400  |
| C | 4.29794600  | -2.65101300 | 2.98754500  |
| C | 3.23564000  | -3.35948100 | 2.41608600  |
| C | 2.34641900  | -2.76344800 | 1.53945900  |
| C | 2.50583200  | -1.40710400 | 1.21804500  |
| C | 3.56864500  | -0.63987300 | 1.80627300  |
| H | 4.99543700  | -3.13663800 | 3.67069400  |
| H | 1.54307700  | -3.36409700 | 1.11142800  |
| C | 4.38231700  | 3.05029600  | 1.56931200  |
| C | 4.52216200  | 1.72680500  | 1.93175000  |
| C | 3.61206300  | 0.76067000  | 1.46329800  |
| C | 2.45284900  | 2.43580100  | 0.27353800  |
| C | 3.31036600  | 3.41891700  | 0.72617100  |
| H | 5.08880400  | 3.79863900  | 1.93236400  |
| H | 5.33265300  | 1.41947100  | 2.58798600  |
| H | 1.62827400  | 2.67690200  | -0.39811700 |
| F | 3.09398500  | -4.64415900 | 2.73153600  |
| F | 5.47571900  | -0.66385800 | 3.22175000  |
| N | 2.60023200  | 1.14954800  | 0.60903300  |
| C | 3.11514500  | 4.84666300  | 0.32801900  |
| F | 4.20379400  | 5.34239900  | -0.27396600 |
| F | 2.88136800  | 5.62591200  | 1.39223500  |
| F | 2.08768500  | 4.99993100  | -0.51200400 |
| C | -2.99550000 | 3.27650600  | -3.16559200 |
| C | -4.08531100 | 3.77170900  | -2.21464800 |
| H | -3.67665800 | 4.43753500  | -1.43856000 |
| H | -4.83189800 | 4.34585700  | -2.78255000 |
| H | -4.59982700 | 2.93453300  | -1.72255700 |
| C | -2.30181600 | 4.48436400  | -3.81288900 |
| H | -3.04515100 | 5.09894400  | -4.34331800 |
| H | -1.81500600 | 5.11577400  | -3.05373100 |
| H | -1.53878900 | 4.17883100  | -4.54435700 |
| C | -3.64455300 | 2.40070600  | -4.24891100 |
| H | -2.90906400 | 2.04587900  | -4.98622900 |
| H | -4.13372600 | 1.52828100  | -3.79402700 |
| H | -4.40418200 | 2.98537100  | -4.79027900 |
| H | -2.87493100 | 2.11890300  | 1.45344300  |
| C | -3.23686400 | 1.44261100  | 4.12376300  |
| C | -3.99746600 | 0.13606200  | 4.40939400  |
| H | -3.35252400 | -0.61160900 | 4.89538700  |

|      |             |             |             |
|------|-------------|-------------|-------------|
| H    | -4.84552900 | 0.33968700  | 5.08157600  |
| H    | -4.38873700 | -0.29487500 | 3.47598000  |
| C    | -2.67746500 | 2.02633200  | 5.42738600  |
| H    | -2.10800300 | 2.94901400  | 5.23649100  |
| H    | -3.50608900 | 2.27220200  | 6.10857100  |
| H    | -2.01844900 | 1.31915400  | 5.95205400  |
| C    | -4.20593500 | 2.44710900  | 3.49926000  |
| H    | -3.70431400 | 3.39516800  | 3.24987200  |
| H    | -4.67444000 | 2.04770600  | 2.58840500  |
| H    | -5.00783000 | 2.67300600  | 4.21725100  |
| P    | -4.88222500 | -0.23329700 | -0.31956600 |
| F    | -3.28196900 | -0.50534700 | -0.11459700 |
| F    | -5.15951800 | -0.75892500 | 1.19502900  |
| F    | -4.69104100 | 1.29448300  | 0.26211700  |
| F    | -6.46511700 | 0.05660000  | -0.52110100 |
| F    | -4.58137700 | 0.32513200  | -1.82276900 |
| F    | -5.06481200 | -1.73368500 | -0.89994200 |
| -1 2 |             |             |             |
| Ir   | 1.40318200  | -0.37401300 | -0.05211600 |
| C    | -0.83621300 | -4.32254200 | -1.66326200 |
| C    | -1.42325800 | -3.58895800 | -0.60636400 |
| C    | -0.80612500 | -2.43002300 | -0.17584200 |
| C    | 0.92035700  | -2.66529800 | -1.77116200 |
| C    | 0.32345900  | -3.85285000 | -2.23969600 |
| H    | -1.29516200 | -5.24572700 | -2.02092400 |
| H    | -1.23392000 | -1.83910300 | 0.63346000  |
| H    | 0.78848400  | -4.39373200 | -3.06024400 |
| C    | 3.60478700  | -0.06766700 | -2.08876000 |
| C    | 2.49998200  | -0.80157100 | -1.62365900 |
| C    | 2.09553300  | -2.01870600 | -2.28646600 |
| C    | 2.88512200  | -2.45170800 | -3.36931700 |
| C    | 3.97132200  | -1.73130600 | -3.82551300 |
| C    | 4.31557700  | -0.53517100 | -3.17555600 |
| H    | 3.92221700  | 0.85650400  | -1.60471600 |
| H    | 4.54938600  | -2.09222400 | -4.67701800 |
| N    | 0.33647300  | -1.98930700 | -0.71358300 |
| F    | 2.59013300  | -3.58864900 | -4.00060800 |
| F    | 5.36387400  | 0.14568600  | -3.63227700 |
| C    | -2.65984300 | -4.09853100 | 0.06319600  |
| F    | -3.09760200 | -3.28073300 | 1.01799800  |
| F    | -2.43208200 | -5.29331600 | 0.63928700  |
| F    | -3.65252900 | -4.28943300 | -0.81040100 |
| C    | -2.09305600 | 1.09710400  | 3.18093000  |



|   |             |             |             |
|---|-------------|-------------|-------------|
| C | -1.03065800 | 0.28598200  | 3.60558600  |
| C | -0.04906400 | -0.09586500 | 2.70892700  |
| C | -1.06482600 | 1.07420000  | 0.98787300  |
| C | -2.07131500 | 1.50583000  | 1.84824400  |
| H | -0.96391600 | -0.07423600 | 4.63264300  |
| H | 0.77890800  | -0.73891000 | 3.01303500  |
| C | -1.94722100 | 2.44650300  | -2.43791500 |
| C | -2.00613600 | 2.19029700  | -1.06827900 |
| C | -1.03373000 | 1.41025300  | -0.44771800 |
| C | 0.07077600  | 1.12269000  | -2.46202800 |
| C | -0.86524200 | 1.88877600  | -3.13348900 |
| H | -2.83948700 | 2.56203400  | -0.48055200 |
| H | 0.92004800  | 0.67759100  | -2.98352900 |
| H | -0.74099100 | 2.03755400  | -4.20675500 |
| N | -0.07403100 | 0.27505400  | 1.42216300  |
| N | -0.00767100 | 0.89009300  | -1.14571000 |
| C | 4.45031300  | -1.31357400 | 2.66957400  |
| C | 4.29794600  | -2.65101300 | 2.98754500  |
| C | 3.23564000  | -3.35948100 | 2.41608600  |
| C | 2.34641900  | -2.76344800 | 1.53945900  |
| C | 2.50583200  | -1.40710400 | 1.21804500  |
| C | 3.56864500  | -0.63987300 | 1.80627300  |
| H | 4.99543700  | -3.13663800 | 3.67069400  |
| H | 1.54307700  | -3.36409700 | 1.11142800  |
| C | 4.38231700  | 3.05029600  | 1.56931200  |
| C | 4.52216200  | 1.72680500  | 1.93175000  |
| C | 3.61206300  | 0.76067000  | 1.46329800  |
| C | 2.45284900  | 2.43580100  | 0.27353800  |
| C | 3.31036600  | 3.41891700  | 0.72617100  |
| H | 5.08880400  | 3.79863900  | 1.93236400  |
| H | 5.33265300  | 1.41947100  | 2.58798600  |
| H | 1.62827400  | 2.67690200  | -0.39811700 |
| F | 3.09398500  | -4.64415900 | 2.73153600  |
| F | 5.47571900  | -0.66385800 | 3.22175000  |
| N | 2.60023200  | 1.14954800  | 0.60903300  |
| C | 3.11514500  | 4.84666300  | 0.32801900  |
| F | 4.20379400  | 5.34239900  | -0.27396600 |
| F | 2.88136800  | 5.62591200  | 1.39223500  |
| F | 2.08768500  | 4.99993100  | -0.51200400 |
| C | -2.99550000 | 3.27650600  | -3.16559200 |
| C | -4.08531100 | 3.77170900  | -2.21464800 |
| H | -3.67665800 | 4.43753500  | -1.43856000 |
| H | -4.83189800 | 4.34585700  | -2.78255000 |

|   |             |             |             |
|---|-------------|-------------|-------------|
| H | -4.59982700 | 2.93453300  | -1.72255700 |
| C | -2.30181600 | 4.48436400  | -3.81288900 |
| H | -3.04515100 | 5.09894400  | -4.34331800 |
| H | -1.81500600 | 5.11577400  | -3.05373100 |
| H | -1.53878900 | 4.17883100  | -4.54435700 |
| C | -3.64455300 | 2.40070600  | -4.24891100 |
| H | -2.90906400 | 2.04587900  | -4.98622900 |
| H | -4.13372600 | 1.52828100  | -3.79402700 |
| H | -4.40418200 | 2.98537100  | -4.79027900 |
| H | -2.87493100 | 2.11890300  | 1.45344300  |
| C | -3.23686400 | 1.44261100  | 4.12376300  |
| C | -3.99746600 | 0.13606200  | 4.40939400  |
| H | -3.35252400 | -0.61160900 | 4.89538700  |
| H | -4.84552900 | 0.33968700  | 5.08157600  |
| H | -4.38873700 | -0.29487500 | 3.47598000  |
| C | -2.67746500 | 2.02633200  | 5.42738600  |
| H | -2.10800300 | 2.94901400  | 5.23649100  |
| H | -3.50608900 | 2.27220200  | 6.10857100  |
| H | -2.01844900 | 1.31915400  | 5.95205400  |
| C | -4.20593500 | 2.44710900  | 3.49926000  |
| H | -3.70431400 | 3.39516800  | 3.24987200  |
| H | -4.67444000 | 2.04770600  | 2.58840500  |
| H | -5.00783000 | 2.67300600  | 4.21725100  |
| P | -4.88222500 | -0.23329700 | -0.31956600 |
| F | -3.28196900 | -0.50534700 | -0.11459700 |
| F | -5.15951800 | -0.75892500 | 1.19502900  |
| F | -4.69104100 | 1.29448300  | 0.26211700  |
| F | -6.46511700 | 0.05660000  | -0.52110100 |
| F | -4.58137700 | 0.32513200  | -1.82276900 |
| F | -5.06481200 | -1.73368500 | -0.89994200 |

## SET5

<sup>3</sup>Ea-<sup>2</sup>Sa

0 3

|   |            |             |             |
|---|------------|-------------|-------------|
| C | 1.28194300 | -1.26522300 | 0.25377000  |
| C | 1.97503900 | -1.45379000 | 1.60030100  |
| H | 1.53066400 | -0.80416300 | 2.36832000  |
| H | 1.85773000 | -2.49775300 | 1.92546000  |
| H | 3.04861500 | -1.23188000 | 1.53361000  |
| C | 1.93829800 | -2.17872700 | -0.79969800 |
| H | 1.82861100 | -3.23304600 | -0.50547400 |
| H | 1.47280800 | -2.03860700 | -1.78636200 |
| H | 3.00918300 | -1.95769300 | -0.88635500 |

|     |             |             |             |
|-----|-------------|-------------|-------------|
| C   | 2.37147900  | 1.18537200  | -0.23452300 |
| N   | -0.06760600 | -1.81051500 | 0.40599500  |
| C   | -1.08141200 | -1.53976000 | -0.46240200 |
| H   | -1.12778900 | -2.16760600 | -1.36382100 |
| C   | -2.14189400 | -0.63742300 | -0.18957500 |
| C   | -2.20941400 | 0.09798100  | 1.02601700  |
| C   | -3.18223500 | -0.44146800 | -1.13778400 |
| C   | -3.24646800 | 0.98906100  | 1.26014200  |
| C   | -4.21122600 | 0.45335500  | -0.89026100 |
| C   | -4.25416600 | 1.18069700  | 0.30714400  |
| H   | -3.27747700 | 1.54155000  | 2.20303300  |
| H   | -4.99645900 | 0.59090100  | -1.63836400 |
| C   | 1.17697900  | 0.20306900  | -0.22004100 |
| H   | 0.39282200  | 0.68227700  | 0.38886100  |
| H   | 0.76320700  | 0.16124200  | -1.24177500 |
| C   | 1.88806100  | 2.40717000  | -1.02914200 |
| H   | 2.66096400  | 3.19175300  | -1.04796400 |
| H   | 1.65274300  | 2.13736000  | -2.07093600 |
| H   | 0.97920200  | 2.83890900  | -0.58008000 |
| C   | 2.74370600  | 1.66653100  | 1.17251800  |
| H   | 1.86043700  | 2.05650800  | 1.70314600  |
| H   | 3.18515300  | 0.87289800  | 1.78916100  |
| H   | 3.48260600  | 2.48122800  | 1.10877700  |
| C   | 3.61504900  | 0.62560900  | -0.92733700 |
| H   | 4.07979600  | -0.18796000 | -0.35080000 |
| H   | 3.38037600  | 0.24392400  | -1.93330000 |
| H   | 4.37283800  | 1.41751700  | -1.03866500 |
| H   | -3.15767400 | -1.00254800 | -2.07587600 |
| H   | -5.06780700 | 1.88412400  | 0.49707300  |
| H   | -1.43973400 | -0.06005700 | 1.78558700  |
| 1 2 |             |             |             |
| C   | 1.28194300  | -1.26522300 | 0.25377000  |
| C   | 1.97503900  | -1.45379000 | 1.60030100  |
| H   | 1.53066400  | -0.80416300 | 2.36832000  |
| H   | 1.85773000  | -2.49775300 | 1.92546000  |
| H   | 3.04861500  | -1.23188000 | 1.53361000  |
| C   | 1.93829800  | -2.17872700 | -0.79969800 |
| H   | 1.82861100  | -3.23304600 | -0.50547400 |
| H   | 1.47280800  | -2.03860700 | -1.78636200 |
| H   | 3.00918300  | -1.95769300 | -0.88635500 |
| C   | 2.37147900  | 1.18537200  | -0.23452300 |
| N   | -0.06760600 | -1.81051500 | 0.40599500  |
| C   | -1.08141200 | -1.53976000 | -0.46240200 |

|   |             |             |             |
|---|-------------|-------------|-------------|
| H | -1.12778900 | -2.16760600 | -1.36382100 |
| C | -2.14189400 | -0.63742300 | -0.18957500 |
| C | -2.20941400 | 0.09798100  | 1.02601700  |
| C | -3.18223500 | -0.44146800 | -1.13778400 |
| C | -3.24646800 | 0.98906100  | 1.26014200  |
| C | -4.21122600 | 0.45335500  | -0.89026100 |
| C | -4.25416600 | 1.18069700  | 0.30714400  |
| H | -3.27747700 | 1.54155000  | 2.20303300  |
| H | -4.99645900 | 0.59090100  | -1.63836400 |
| C | 1.17697900  | 0.20306900  | -0.22004100 |
| H | 0.39282200  | 0.68227700  | 0.38886100  |
| H | 0.76320700  | 0.16124200  | -1.24177500 |
| C | 1.88806100  | 2.40717000  | -1.02914200 |
| H | 2.66096400  | 3.19175300  | -1.04796400 |
| H | 1.65274300  | 2.13736000  | -2.07093600 |
| H | 0.97920200  | 2.83890900  | -0.58008000 |
| C | 2.74370600  | 1.66653100  | 1.17251800  |
| H | 1.86043700  | 2.05650800  | 1.70314600  |
| H | 3.18515300  | 0.87289800  | 1.78916100  |
| H | 3.48260600  | 2.48122800  | 1.10877700  |
| C | 3.61504900  | 0.62560900  | -0.92733700 |
| H | 4.07979600  | -0.18796000 | -0.35080000 |
| H | 3.38037600  | 0.24392400  | -1.93330000 |
| H | 4.37283800  | 1.41751700  | -1.03866500 |
| H | -3.15767400 | -1.00254800 | -2.07587600 |
| H | -5.06780700 | 1.88412400  | 0.49707300  |
| H | -1.43973400 | -0.06005700 | 1.78558700  |

Ir(III)\*-Ir(II)

0 3

|    |             |             |             |
|----|-------------|-------------|-------------|
| Ir | 1.40318200  | -0.37401300 | -0.05211600 |
| C  | -0.83621300 | -4.32254200 | -1.66326200 |
| C  | -1.42325800 | -3.58895800 | -0.60636400 |
| C  | -0.80612500 | -2.43002300 | -0.17584200 |
| C  | 0.92035700  | -2.66529800 | -1.77116200 |
| C  | 0.32345900  | -3.85285000 | -2.23969600 |
| H  | -1.29516200 | -5.24572700 | -2.02092400 |
| H  | -1.23392000 | -1.83910300 | 0.63346000  |
| H  | 0.78848400  | -4.39373200 | -3.06024400 |
| C  | 3.60478700  | -0.06766700 | -2.08876000 |
| C  | 2.49998200  | -0.80157100 | -1.62365900 |
| C  | 2.09553300  | -2.01870600 | -2.28646600 |
| C  | 2.88512200  | -2.45170800 | -3.36931700 |

|   |             |             |             |
|---|-------------|-------------|-------------|
| C | 3.97132200  | -1.73130600 | -3.82551300 |
| C | 4.31557700  | -0.53517100 | -3.17555600 |
| H | 3.92221700  | 0.85650400  | -1.60471600 |
| H | 4.54938600  | -2.09222400 | -4.67701800 |
| N | 0.33647300  | -1.98930700 | -0.71358300 |
| F | 2.59013300  | -3.58864900 | -4.00060800 |
| F | 5.36387400  | 0.14568600  | -3.63227700 |
| C | -2.65984300 | -4.09853100 | 0.06319600  |
| F | -3.09760200 | -3.28073300 | 1.01799800  |
| F | -2.43208200 | -5.29331600 | 0.63928700  |
| F | -3.65252900 | -4.28943300 | -0.81040100 |
| C | -2.09305600 | 1.09710400  | 3.18093000  |
| C | -1.03065800 | 0.28598200  | 3.60558600  |
| C | -0.04906400 | -0.09586500 | 2.70892700  |
| C | -1.06482600 | 1.07420000  | 0.98787300  |
| C | -2.07131500 | 1.50583000  | 1.84824400  |
| H | -0.96391600 | -0.07423600 | 4.63264300  |
| H | 0.77890800  | -0.73891000 | 3.01303500  |
| C | -1.94722100 | 2.44650300  | -2.43791500 |
| C | -2.00613600 | 2.19029700  | -1.06827900 |
| C | -1.03373000 | 1.41025300  | -0.44771800 |
| C | 0.07077600  | 1.12269000  | -2.46202800 |
| C | -0.86524200 | 1.88877600  | -3.13348900 |
| H | -2.83948700 | 2.56203400  | -0.48055200 |
| H | 0.92004800  | 0.67759100  | -2.98352900 |
| H | -0.74099100 | 2.03755400  | -4.20675500 |
| N | -0.07403100 | 0.27505400  | 1.42216300  |
| N | -0.00767100 | 0.89009300  | -1.14571000 |
| C | 4.45031300  | -1.31357400 | 2.66957400  |
| C | 4.29794600  | -2.65101300 | 2.98754500  |
| C | 3.23564000  | -3.35948100 | 2.41608600  |
| C | 2.34641900  | -2.76344800 | 1.53945900  |
| C | 2.50583200  | -1.40710400 | 1.21804500  |
| C | 3.56864500  | -0.63987300 | 1.80627300  |
| H | 4.99543700  | -3.13663800 | 3.67069400  |
| H | 1.54307700  | -3.36409700 | 1.11142800  |
| C | 4.38231700  | 3.05029600  | 1.56931200  |
| C | 4.52216200  | 1.72680500  | 1.93175000  |
| C | 3.61206300  | 0.76067000  | 1.46329800  |
| C | 2.45284900  | 2.43580100  | 0.27353800  |
| C | 3.31036600  | 3.41891700  | 0.72617100  |
| H | 5.08880400  | 3.79863900  | 1.93236400  |
| H | 5.33265300  | 1.41947100  | 2.58798600  |

|   |             |             |             |
|---|-------------|-------------|-------------|
| H | 1.62827400  | 2.67690200  | -0.39811700 |
| F | 3.09398500  | -4.64415900 | 2.73153600  |
| F | 5.47571900  | -0.66385800 | 3.22175000  |
| N | 2.60023200  | 1.14954800  | 0.60903300  |
| C | 3.11514500  | 4.84666300  | 0.32801900  |
| F | 4.20379400  | 5.34239900  | -0.27396600 |
| F | 2.88136800  | 5.62591200  | 1.39223500  |
| F | 2.08768500  | 4.99993100  | -0.51200400 |
| C | -2.99550000 | 3.27650600  | -3.16559200 |
| C | -4.08531100 | 3.77170900  | -2.21464800 |
| H | -3.67665800 | 4.43753500  | -1.43856000 |
| H | -4.83189800 | 4.34585700  | -2.78255000 |
| H | -4.59982700 | 2.93453300  | -1.72255700 |
| C | -2.30181600 | 4.48436400  | -3.81288900 |
| H | -3.04515100 | 5.09894400  | -4.34331800 |
| H | -1.81500600 | 5.11577400  | -3.05373100 |
| H | -1.53878900 | 4.17883100  | -4.54435700 |
| C | -3.64455300 | 2.40070600  | -4.24891100 |
| H | -2.90906400 | 2.04587900  | -4.98622900 |
| H | -4.13372600 | 1.52828100  | -3.79402700 |
| H | -4.40418200 | 2.98537100  | -4.79027900 |
| H | -2.87493100 | 2.11890300  | 1.45344300  |
| C | -3.23686400 | 1.44261100  | 4.12376300  |
| C | -3.99746600 | 0.13606200  | 4.40939400  |
| H | -3.35252400 | -0.61160900 | 4.89538700  |
| H | -4.84552900 | 0.33968700  | 5.08157600  |
| H | -4.38873700 | -0.29487500 | 3.47598000  |
| C | -2.67746500 | 2.02633200  | 5.42738600  |
| H | -2.10800300 | 2.94901400  | 5.23649100  |
| H | -3.50608900 | 2.27220200  | 6.10857100  |
| H | -2.01844900 | 1.31915400  | 5.95205400  |
| C | -4.20593500 | 2.44710900  | 3.49926000  |
| H | -3.70431400 | 3.39516800  | 3.24987200  |
| H | -4.67444000 | 2.04770600  | 2.58840500  |
| H | -5.00783000 | 2.67300600  | 4.21725100  |
| P | -4.88222500 | -0.23329700 | -0.31956600 |
| F | -3.28196900 | -0.50534700 | -0.11459700 |
| F | -5.15951800 | -0.75892500 | 1.19502900  |
| F | -4.69104100 | 1.29448300  | 0.26211700  |
| F | -6.46511700 | 0.05660000  | -0.52110100 |
| F | -4.58137700 | 0.32513200  | -1.82276900 |
| F | -5.06481200 | -1.73368500 | -0.89994200 |

|    |             |             |             |
|----|-------------|-------------|-------------|
| Ir | 1.40318200  | -0.37401300 | -0.05211600 |
| C  | -0.83621300 | -4.32254200 | -1.66326200 |
| C  | -1.42325800 | -3.58895800 | -0.60636400 |
| C  | -0.80612500 | -2.43002300 | -0.17584200 |
| C  | 0.92035700  | -2.66529800 | -1.77116200 |
| C  | 0.32345900  | -3.85285000 | -2.23969600 |
| H  | -1.29516200 | -5.24572700 | -2.02092400 |
| H  | -1.23392000 | -1.83910300 | 0.63346000  |
| H  | 0.78848400  | -4.39373200 | -3.06024400 |
| C  | 3.60478700  | -0.06766700 | -2.08876000 |
| C  | 2.49998200  | -0.80157100 | -1.62365900 |
| C  | 2.09553300  | -2.01870600 | -2.28646600 |
| C  | 2.88512200  | -2.45170800 | -3.36931700 |
| C  | 3.97132200  | -1.73130600 | -3.82551300 |
| C  | 4.31557700  | -0.53517100 | -3.17555600 |
| H  | 3.92221700  | 0.85650400  | -1.60471600 |
| H  | 4.54938600  | -2.09222400 | -4.67701800 |
| N  | 0.33647300  | -1.98930700 | -0.71358300 |
| F  | 2.59013300  | -3.58864900 | -4.00060800 |
| F  | 5.36387400  | 0.14568600  | -3.63227700 |
| C  | -2.65984300 | -4.09853100 | 0.06319600  |
| F  | -3.09760200 | -3.28073300 | 1.01799800  |
| F  | -2.43208200 | -5.29331600 | 0.63928700  |
| F  | -3.65252900 | -4.28943300 | -0.81040100 |
| C  | -2.09305600 | 1.09710400  | 3.18093000  |
| C  | -1.03065800 | 0.28598200  | 3.60558600  |
| C  | -0.04906400 | -0.09586500 | 2.70892700  |
| C  | -1.06482600 | 1.07420000  | 0.98787300  |
| C  | -2.07131500 | 1.50583000  | 1.84824400  |
| H  | -0.96391600 | -0.07423600 | 4.63264300  |
| H  | 0.77890800  | -0.73891000 | 3.01303500  |
| C  | -1.94722100 | 2.44650300  | -2.43791500 |
| C  | -2.00613600 | 2.19029700  | -1.06827900 |
| C  | -1.03373000 | 1.41025300  | -0.44771800 |
| C  | 0.07077600  | 1.12269000  | -2.46202800 |
| C  | -0.86524200 | 1.88877600  | -3.13348900 |
| H  | -2.83948700 | 2.56203400  | -0.48055200 |
| H  | 0.92004800  | 0.67759100  | -2.98352900 |
| H  | -0.74099100 | 2.03755400  | -4.20675500 |
| N  | -0.07403100 | 0.27505400  | 1.42216300  |
| N  | -0.00767100 | 0.89009300  | -1.14571000 |
| C  | 4.45031300  | -1.31357400 | 2.66957400  |
| C  | 4.29794600  | -2.65101300 | 2.98754500  |

|   |             |             |             |
|---|-------------|-------------|-------------|
| C | 3.23564000  | -3.35948100 | 2.41608600  |
| C | 2.34641900  | -2.76344800 | 1.53945900  |
| C | 2.50583200  | -1.40710400 | 1.21804500  |
| C | 3.56864500  | -0.63987300 | 1.80627300  |
| H | 4.99543700  | -3.13663800 | 3.67069400  |
| H | 1.54307700  | -3.36409700 | 1.11142800  |
| C | 4.38231700  | 3.05029600  | 1.56931200  |
| C | 4.52216200  | 1.72680500  | 1.93175000  |
| C | 3.61206300  | 0.76067000  | 1.46329800  |
| C | 2.45284900  | 2.43580100  | 0.27353800  |
| C | 3.31036600  | 3.41891700  | 0.72617100  |
| H | 5.08880400  | 3.79863900  | 1.93236400  |
| H | 5.33265300  | 1.41947100  | 2.58798600  |
| H | 1.62827400  | 2.67690200  | -0.39811700 |
| F | 3.09398500  | -4.64415900 | 2.73153600  |
| F | 5.47571900  | -0.66385800 | 3.22175000  |
| N | 2.60023200  | 1.14954800  | 0.60903300  |
| C | 3.11514500  | 4.84666300  | 0.32801900  |
| F | 4.20379400  | 5.34239900  | -0.27396600 |
| F | 2.88136800  | 5.62591200  | 1.39223500  |
| F | 2.08768500  | 4.99993100  | -0.51200400 |
| C | -2.99550000 | 3.27650600  | -3.16559200 |
| C | -4.08531100 | 3.77170900  | -2.21464800 |
| H | -3.67665800 | 4.43753500  | -1.43856000 |
| H | -4.83189800 | 4.34585700  | -2.78255000 |
| H | -4.59982700 | 2.93453300  | -1.72255700 |
| C | -2.30181600 | 4.48436400  | -3.81288900 |
| H | -3.04515100 | 5.09894400  | -4.34331800 |
| H | -1.81500600 | 5.11577400  | -3.05373100 |
| H | -1.53878900 | 4.17883100  | -4.54435700 |
| C | -3.64455300 | 2.40070600  | -4.24891100 |
| H | -2.90906400 | 2.04587900  | -4.98622900 |
| H | -4.13372600 | 1.52828100  | -3.79402700 |
| H | -4.40418200 | 2.98537100  | -4.79027900 |
| H | -2.87493100 | 2.11890300  | 1.45344300  |
| C | -3.23686400 | 1.44261100  | 4.12376300  |
| C | -3.99746600 | 0.13606200  | 4.40939400  |
| H | -3.35252400 | -0.61160900 | 4.89538700  |
| H | -4.84552900 | 0.33968700  | 5.08157600  |
| H | -4.38873700 | -0.29487500 | 3.47598000  |
| C | -2.67746500 | 2.02633200  | 5.42738600  |
| H | -2.10800300 | 2.94901400  | 5.23649100  |
| H | -3.50608900 | 2.27220200  | 6.10857100  |



|   |             |             |             |
|---|-------------|-------------|-------------|
| H | -2.01844900 | 1.31915400  | 5.95205400  |
| C | -4.20593500 | 2.44710900  | 3.49926000  |
| H | -3.70431400 | 3.39516800  | 3.24987200  |
| H | -4.67444000 | 2.04770600  | 2.58840500  |
| H | -5.00783000 | 2.67300600  | 4.21725100  |
| P | -4.88222500 | -0.23329700 | -0.31956600 |
| F | -3.28196900 | -0.50534700 | -0.11459700 |
| F | -5.15951800 | -0.75892500 | 1.19502900  |
| F | -4.69104100 | 1.29448300  | 0.26211700  |
| F | -6.46511700 | 0.05660000  | -0.52110100 |
| F | -4.58137700 | 0.32513200  | -1.82276900 |
| F | -5.06481200 | -1.73368500 | -0.89994200 |

35

|                                              |          |             |
|----------------------------------------------|----------|-------------|
| Zero-point correction=                       | 0.347901 |             |
| Thermal correction to Energy=                | 0.361558 |             |
| Thermal correction to Enthalpy=              | 0.362502 |             |
| Thermal correction to Gibbs Free Energy=     |          | 0.306312    |
| Sum of electronic and zero-point Energies=   |          | -713.581865 |
| Sum of electronic and thermal Energies=      |          | -713.568207 |
| Sum of electronic and thermal Enthalpies=    |          | -713.567263 |
| Sum of electronic and thermal Free Energies= |          | -713.623453 |

Cartesian coordinates

|   |           |           |           |
|---|-----------|-----------|-----------|
| C | -1.904263 | 1.170471  | -1.248875 |
| H | -0.943594 | 1.707354  | -1.268128 |
| H | -2.459132 | 1.455746  | -2.158757 |
| C | -2.701870 | 1.558517  | -0.000129 |
| H | -2.881989 | 2.646542  | -0.000206 |
| C | -1.656200 | -0.340220 | -1.252439 |
| H | -1.072736 | -0.624271 | -2.144217 |
| C | -0.858083 | -0.752962 | 0.000018  |
| H | -0.764089 | -1.860092 | 0.000098  |
| C | -1.904238 | 1.170650  | 1.248656  |
| H | -2.459087 | 1.456057  | 2.158509  |
| H | -0.943566 | 1.707532  | 1.267810  |
| C | -1.656178 | -0.340041 | 1.252430  |
| H | -1.072697 | -0.623965 | 2.144238  |
| C | -2.995353 | -1.082658 | 1.247570  |
| H | -2.827240 | -2.172879 | 1.269433  |
| H | -3.563397 | -0.826825 | 2.157922  |
| C | -4.042408 | 0.815386  | -0.000063 |
| H | -4.633975 | 1.100541  | -0.886930 |

|   |           |           |           |
|---|-----------|-----------|-----------|
| H | -4.633960 | 1.100667  | 0.886773  |
| C | -2.995376 | -1.082837 | -1.247446 |
| H | -3.563436 | -0.827135 | -2.157825 |
| H | -2.827264 | -2.173061 | -1.269156 |
| C | -3.794928 | -0.696667 | 0.000042  |
| H | -4.759744 | -1.230594 | 0.000088  |
| N | 0.442848  | -0.136954 | -0.000029 |
| C | 1.466867  | -0.886444 | 0.000079  |
| H | 1.371713  | -1.992057 | 0.000193  |
| C | 2.844189  | -0.370426 | 0.000047  |
| C | 3.107607  | 1.008152  | -0.000125 |
| C | 3.917512  | -1.270654 | 0.000203  |
| C | 4.418027  | 1.471670  | -0.000140 |
| H | 2.262951  | 1.700395  | -0.000245 |
| C | 5.231565  | -0.805350 | 0.000190  |
| H | 3.716737  | -2.345799 | 0.000338  |
| C | 5.483814  | 0.566152  | 0.000019  |
| H | 4.615764  | 2.546385  | -0.000275 |
| H | 6.061693  | -1.515596 | 0.000315  |
| H | 6.513008  | 0.933288  | 0.000009  |

#### Vibrational frequencies

|          |          |          |
|----------|----------|----------|
| 26.3521  | 40.1273  | 56.3564  |
| 104.3815 | 151.3458 | 210.0202 |
| 277.1846 | 302.3070 | 326.3743 |
| 346.5222 | 381.2380 | 415.6698 |
| 420.6453 | 426.3384 | 445.9638 |
| 450.2930 | 467.9533 | 538.8157 |
| 561.2096 | 627.4652 | 636.7934 |
| 652.0357 | 671.2298 | 705.7149 |
| 720.0953 | 786.6434 | 790.9850 |
| 822.7216 | 831.7690 | 843.3175 |

35<sup>+</sup>

|                                              |             |             |
|----------------------------------------------|-------------|-------------|
| Zero-point correction=                       | 0.346506    |             |
| Thermal correction to Energy=                | 0.360530    |             |
| Thermal correction to Enthalpy=              | 0.361474    |             |
| Thermal correction to Gibbs Free Energy=     |             | 0.303965    |
| Sum of electronic and zero-point Energies=   |             | -713.355045 |
| Sum of electronic and thermal Energies=      | -713.341021 |             |
| Sum of electronic and thermal Enthalpies=    |             | -713.340077 |
| Sum of electronic and thermal Free Energies= |             | -713.397586 |



|          |          |          |
|----------|----------|----------|
| 107.9486 | 152.3005 | 210.4877 |
| 242.0787 | 269.8690 | 312.2183 |
| 322.9005 | 386.3781 | 388.3823 |
| 412.3697 | 416.2056 | 442.9511 |
| 450.5971 | 464.9346 | 476.7945 |
| 548.7283 | 624.0028 | 633.0204 |
| 634.9039 | 652.7092 | 689.0406 |
| 703.7763 | 767.8282 | 776.9380 |
| 803.1397 | 827.4782 | 832.9003 |

<sup>335</sup>

|                                              |          |             |
|----------------------------------------------|----------|-------------|
| Zero-point correction=                       | 0.344314 |             |
| Thermal correction to Energy=                | 0.358245 |             |
| Thermal correction to Enthalpy=              | 0.359189 |             |
| Thermal correction to Gibbs Free Energy=     |          | 0.299475    |
| Sum of electronic and zero-point Energies=   |          | -713.499659 |
| Sum of electronic and thermal Energies=      |          | -713.485727 |
| Sum of electronic and thermal Enthalpies=    |          | -713.484783 |
| Sum of electronic and thermal Free Energies= |          | -713.544497 |

Cartesian coordinates

|   |          |           |           |
|---|----------|-----------|-----------|
| C | 0.932743 | 1.338179  | 0.427291  |
| H | 0.024640 | 1.544372  | -0.156651 |
| H | 0.928823 | 2.039347  | 1.278994  |
| C | 2.177086 | 1.557426  | -0.436200 |
| H | 2.179019 | 2.590041  | -0.821848 |
| C | 0.915911 | -0.098722 | 0.958178  |
| H | 0.009954 | -0.274226 | 1.561143  |
| C | 0.932994 | -1.106583 | -0.213101 |
| H | 1.006109 | -2.118568 | 0.241637  |
| C | 2.154923 | 0.571871  | -1.607533 |
| H | 3.022544 | 0.739956  | -2.266804 |
| H | 1.248833 | 0.727180  | -2.217251 |
| C | 2.174644 | -0.864507 | -1.078489 |
| H | 2.155146 | -1.576845 | -1.919459 |
| C | 3.421938 | -1.091066 | -0.220329 |
| H | 3.444465 | -2.130948 | 0.149466  |
| H | 4.327702 | -0.950076 | -0.835167 |
| C | 3.429827 | 1.322940  | 0.414722  |
| H | 3.458689 | 2.042817  | 1.249709  |
| H | 4.336832 | 1.494009  | -0.190116 |
| C | 2.170595 | -0.335688 | 1.805924  |
| H | 2.166233 | 0.354880  | 2.666900  |

|   |           |           |           |
|---|-----------|-----------|-----------|
| H | 2.166411  | -1.360183 | 2.215505  |
| C | 3.424833  | -0.110227 | 0.954743  |
| H | 4.322211  | -0.278012 | 1.572902  |
| N | -0.264716 | -1.142931 | -1.006982 |
| C | -1.452611 | -1.501316 | -0.435301 |
| H | -1.574408 | -2.580098 | -0.253922 |
| C | -2.556169 | -0.641225 | -0.212429 |
| C | -2.561395 | 0.720563  | -0.625933 |
| C | -3.726737 | -1.137738 | 0.425942  |
| C | -3.656868 | 1.534624  | -0.379453 |
| H | -1.698724 | 1.112788  | -1.168418 |
| C | -4.814202 | -0.312911 | 0.664813  |
| H | -3.755855 | -2.186151 | 0.737451  |
| C | -4.789640 | 1.033181  | 0.271867  |
| H | -3.635588 | 2.576285  | -0.710225 |
| H | -5.698399 | -0.718337 | 1.163333  |
| H | -5.648863 | 1.679467  | 0.463419  |

#### Vibrational frequencies

|          |          |          |
|----------|----------|----------|
| 1.5729   | 43.4736  | 79.0984  |
| 120.1531 | 155.9088 | 206.3386 |
| 254.3711 | 295.0073 | 325.0306 |
| 340.4781 | 372.6037 | 407.2233 |
| 416.8304 | 423.8501 | 446.4403 |
| 451.1939 | 492.6134 | 502.8908 |
| 547.8284 | 601.9258 | 624.7489 |
| 645.6046 | 650.1920 | 671.4980 |
| 692.5358 | 701.2020 | 768.8262 |
| 786.3968 | 819.2316 | 830.3355 |

#### 36

|                                              |          |             |
|----------------------------------------------|----------|-------------|
| Zero-point correction=                       | 0.333144 |             |
| Thermal correction to Energy=                | 0.352890 |             |
| Thermal correction to Enthalpy=              | 0.353834 |             |
| Thermal correction to Gibbs Free Energy=     |          | 0.284533    |
| Sum of electronic and zero-point Energies=   |          | -824.676540 |
| Sum of electronic and thermal Energies=      |          | -824.656793 |
| Sum of electronic and thermal Enthalpies=    |          | -824.655849 |
| Sum of electronic and thermal Free Energies= |          | -824.725151 |

#### Cartesian coordinates

|   |          |          |          |
|---|----------|----------|----------|
| C | 2.334094 | 1.331117 | 0.001407 |
| C | 2.949181 | 0.074059 | 0.004210 |

|   |           |           |           |
|---|-----------|-----------|-----------|
| C | 2.185333  | -1.094260 | 0.000336  |
| C | 0.785920  | -1.004742 | -0.005079 |
| C | 0.124915  | 0.247523  | -0.006805 |
| C | 0.944716  | 1.409872  | -0.004232 |
| C | -1.327359 | 0.435847  | -0.013934 |
| N | -2.205103 | -0.487691 | 0.016983  |
| C | -3.627637 | -0.159915 | 0.006765  |
| C | -4.221538 | -0.878996 | -1.209461 |
| C | -3.978023 | 1.327727  | -0.061735 |
| O | 0.016561  | -2.098978 | -0.011518 |
| C | 0.610048  | -3.372579 | -0.016316 |
| C | -4.212285 | -0.761923 | 1.289343  |
| O | 4.292307  | 0.081810  | 0.010692  |
| C | 4.985694  | -1.142930 | 0.014769  |
| O | 0.296679  | 2.589567  | -0.005887 |
| C | 1.035001  | 3.786237  | -0.007167 |
| H | 2.968684  | 2.214922  | 0.004873  |
| H | 2.668483  | -2.066979 | 0.001463  |
| H | -1.610909 | 1.498805  | -0.047352 |
| H | -3.975830 | -1.950695 | -1.175471 |
| H | -5.316670 | -0.768373 | -1.235316 |
| H | -3.809566 | -0.463486 | -2.142283 |
| H | -5.071214 | 1.449091  | -0.068302 |
| H | -3.587031 | 1.881736  | 0.805908  |
| H | -3.585134 | 1.798615  | -0.976404 |
| H | 1.232508  | -3.531496 | -0.912801 |
| H | 1.225734  | -3.541313 | 0.883029  |
| H | -0.214548 | -4.095855 | -0.023228 |
| H | -3.795827 | -0.258283 | 2.175584  |
| H | -5.307500 | -0.651853 | 1.311304  |
| H | -3.963810 | -1.831462 | 1.355875  |
| H | 6.054216  | -0.896502 | 0.020732  |
| H | 4.750039  | -1.739832 | 0.911507  |
| H | 4.760155  | -1.740112 | -0.884372 |
| H | 1.671354  | 3.869361  | -0.903660 |
| H | 0.302661  | 4.602482  | -0.010713 |
| H | 1.667187  | 3.873655  | 0.891846  |

Vibrational frequencies

|          |          |          |
|----------|----------|----------|
| 12.6124  | 35.3792  | 64.4666  |
| 77.4392  | 89.2776  | 105.1916 |
| 115.6231 | 175.6537 | 182.1356 |
| 182.7056 | 187.7979 | 206.9912 |

|          |          |          |
|----------|----------|----------|
| 234.0963 | 235.9143 | 249.6986 |
| 253.6984 | 273.2317 | 287.6674 |
| 290.8479 | 313.4766 | 325.7391 |
| 349.4480 | 356.6312 | 376.6866 |
| 394.5320 | 445.4084 | 473.1540 |
| 486.1064 | 516.1144 | 542.8041 |

36<sup>+</sup>

|                                              |          |             |
|----------------------------------------------|----------|-------------|
| Zero-point correction=                       | 0.332743 |             |
| Thermal correction to Energy=                | 0.352728 |             |
| Thermal correction to Enthalpy=              | 0.353672 |             |
| Thermal correction to Gibbs Free Energy=     |          | 0.283396    |
| Sum of electronic and zero-point Energies=   |          | -824.469322 |
| Sum of electronic and thermal Energies=      |          | -824.449338 |
| Sum of electronic and thermal Enthalpies=    |          | -824.448394 |
| Sum of electronic and thermal Free Energies= |          | -824.518670 |

Cartesian coordinates

|   |           |           |           |
|---|-----------|-----------|-----------|
| C | 2.359914  | 1.307499  | 0.014955  |
| C | 2.917167  | 0.002000  | 0.073161  |
| C | 2.119194  | -1.154867 | 0.008222  |
| C | 0.746575  | -1.018613 | -0.108739 |
| C | 0.125907  | 0.298460  | -0.088310 |
| C | 0.998376  | 1.456703  | -0.088224 |
| C | -1.288933 | 0.527888  | -0.045755 |
| N | -2.156907 | -0.399758 | 0.175785  |
| C | -3.580614 | -0.130803 | 0.105761  |
| C | -4.107591 | -1.081901 | -0.981823 |
| C | -3.974210 | 1.308173  | -0.218695 |
| O | -0.071910 | -2.030674 | -0.247396 |
| C | 0.423215  | -3.358646 | -0.235948 |
| C | -4.151453 | -0.548486 | 1.467272  |
| O | 4.221145  | -0.030562 | 0.172534  |
| C | 4.925194  | -1.265038 | 0.238468  |
| O | 0.376753  | 2.622528  | -0.152731 |
| C | 1.130465  | 3.820602  | -0.110059 |
| H | 3.045117  | 2.151429  | 0.057722  |
| H | 2.576878  | -2.139637 | 0.015763  |
| H | -1.577548 | 1.578907  | -0.185920 |
| H | -3.822653 | -2.119571 | -0.757936 |
| H | -5.204605 | -1.015712 | -1.028028 |
| H | -3.698463 | -0.810747 | -1.966356 |
| H | -5.070002 | 1.387497  | -0.249879 |

|   |           |           |           |
|---|-----------|-----------|-----------|
| H | -3.613724 | 2.012478  | 0.546962  |
| H | -3.589022 | 1.627242  | -1.199273 |
| H | 1.113293  | -3.522016 | -1.077854 |
| H | 0.932318  | -3.576533 | 0.714925  |
| H | -0.452518 | -4.006419 | -0.345018 |
| H | -3.772969 | 0.108993  | 2.264157  |
| H | -5.249032 | -0.478064 | 1.449676  |
| H | -3.865495 | -1.583290 | 1.703243  |
| H | 5.982929  | -1.000879 | 0.334041  |
| H | 4.605447  | -1.845252 | 1.115999  |
| H | 4.769339  | -1.846965 | -0.681347 |
| H | 1.829712  | 3.871972  | -0.958884 |
| H | 0.405924  | 4.638486  | -0.180391 |
| H | 1.686271  | 3.898216  | 0.836933  |

#### Vibrational frequencies

|          |          |          |
|----------|----------|----------|
| 19.3421  | 28.4693  | 49.9627  |
| 82.4688  | 94.8730  | 112.3728 |
| 138.2645 | 167.4546 | 168.9594 |
| 171.1559 | 181.9665 | 205.8593 |
| 223.0226 | 232.1907 | 234.5174 |
| 246.5144 | 253.2532 | 277.5864 |
| 281.4830 | 314.6403 | 316.5443 |
| 349.3545 | 352.5457 | 365.5949 |
| 398.9084 | 441.3115 | 455.9126 |
| 479.1944 | 491.9471 | 510.6546 |

<sup>3</sup>36

|                                              |             |             |
|----------------------------------------------|-------------|-------------|
| Zero-point correction=                       | 0.330101    |             |
| Thermal correction to Energy=                | 0.350034    |             |
| Thermal correction to Enthalpy=              | 0.350978    |             |
| Thermal correction to Gibbs Free Energy=     |             | 0.281430    |
| Sum of electronic and zero-point Energies=   |             | -824.601684 |
| Sum of electronic and thermal Energies=      | -824.581751 |             |
| Sum of electronic and thermal Enthalpies=    |             | -824.580806 |
| Sum of electronic and thermal Free Energies= |             | -824.650355 |

#### Cartesian coordinates

|   |          |           |           |
|---|----------|-----------|-----------|
| C | 2.453396 | 1.078281  | -0.061048 |
| C | 2.765722 | -0.290700 | -0.101430 |
| C | 1.762708 | -1.251433 | 0.065132  |
| C | 0.443760 | -0.840755 | 0.273283  |
| C | 0.080525 | 0.536445  | 0.325150  |



|   |           |           |           |
|---|-----------|-----------|-----------|
| C | 1.143728  | 1.481292  | 0.147503  |
| C | -1.236439 | 1.003340  | 0.544390  |
| N | -2.337164 | 0.241538  | 0.818604  |
| C | -3.323039 | -0.065174 | -0.212924 |
| C | -4.085610 | -1.307527 | 0.241852  |
| C | -2.695487 | -0.291178 | -1.588778 |
| O | -0.572294 | -1.714073 | 0.436311  |
| C | -0.309632 | -3.092886 | 0.412799  |
| C | -4.270989 | 1.145068  | -0.261062 |
| O | 4.066890  | -0.589611 | -0.308678 |
| C | 4.450137  | -1.939002 | -0.368064 |
| O | 0.765091  | 2.774698  | 0.197206  |
| C | 1.735749  | 3.777363  | 0.037995  |
| H | 3.263182  | 1.793043  | -0.198153 |
| H | 2.001820  | -2.311346 | 0.031647  |
| H | -1.379887 | 2.089287  | 0.613568  |
| H | -4.523368 | -1.145821 | 1.238079  |
| H | -4.894815 | -1.548686 | -0.463647 |
| H | -3.405601 | -2.169934 | 0.300829  |
| H | -3.476398 | -0.529096 | -2.326580 |
| H | -2.158814 | 0.607493  | -1.928022 |
| H | -1.981125 | -1.125369 | -1.550416 |
| H | 0.108224  | -3.411860 | -0.557051 |
| H | 0.384658  | -3.388530 | 1.217301  |
| H | -1.271398 | -3.597043 | 0.568509  |
| H | -3.735515 | 2.049680  | -0.586637 |
| H | -5.084706 | 0.949318  | -0.975876 |
| H | -4.713005 | 1.334910  | 0.728228  |
| H | 5.532844  | -1.951762 | -0.544337 |
| H | 4.236391  | -2.467403 | 0.576914  |
| H | 3.947762  | -2.471033 | -1.194187 |
| H | 2.226745  | 3.714510  | -0.947819 |
| H | 1.211065  | 4.737451  | 0.115505  |
| H | 2.507426  | 3.724514  | 0.824417  |

Vibrational frequencies

|          |          |          |
|----------|----------|----------|
| 34.8102  | 44.0024  | 56.9434  |
| 69.1264  | 85.0319  | 114.2979 |
| 130.0561 | 159.6636 | 176.1964 |
| 190.0921 | 194.5860 | 208.1816 |
| 222.8038 | 246.5281 | 253.6260 |
| 273.1770 | 278.0977 | 287.8467 |
| 292.9739 | 295.6767 | 315.5156 |

|          |          |          |
|----------|----------|----------|
| 354.0113 | 366.2778 | 374.6555 |
| 404.8588 | 427.0722 | 446.1530 |
| 485.1312 | 493.8764 | 536.3988 |

### R1s

|                                              |          |             |
|----------------------------------------------|----------|-------------|
| Zero-point correction=                       | 0.446380 |             |
| Thermal correction to Energy=                | 0.471246 |             |
| Thermal correction to Enthalpy=              | 0.472190 |             |
| Thermal correction to Gibbs Free Energy=     |          | 0.391734    |
| Sum of electronic and zero-point Energies=   |          | -981.516629 |
| Sum of electronic and thermal Energies=      |          | -981.491763 |
| Sum of electronic and thermal Enthalpies=    |          | -981.490819 |
| Sum of electronic and thermal Free Energies= |          | -981.571275 |

### Cartesian coordinates

|   |           |           |           |
|---|-----------|-----------|-----------|
| C | -2.391184 | 0.494413  | 0.668358  |
| C | -2.887018 | 0.102752  | 2.063118  |
| H | -2.832922 | -0.985856 | 2.206141  |
| H | -2.247478 | 0.577205  | 2.823650  |
| H | -3.920322 | 0.434498  | 2.236400  |
| C | -2.523022 | 2.009539  | 0.500122  |
| H | -1.890554 | 2.539447  | 1.229910  |
| H | -2.234086 | 2.341530  | -0.508765 |
| H | -3.556931 | 2.331609  | 0.669795  |
| C | -4.626765 | -0.443103 | -0.618392 |
| N | -1.014298 | -0.008245 | 0.604950  |
| C | -0.055882 | 0.750213  | 0.246337  |
| H | -0.216418 | 1.811462  | 0.003162  |
| C | 1.348631  | 0.353269  | 0.118413  |
| C | 1.826473  | -0.978826 | 0.154564  |
| C | 2.310951  | 1.380274  | -0.082285 |
| C | 3.189676  | -1.270653 | 0.000306  |
| C | 3.665735  | 1.100787  | -0.234073 |
| C | 4.099231  | -0.229026 | -0.190503 |
| H | 3.532033  | -2.301066 | 0.028863  |
| H | 4.409731  | 1.880758  | -0.382212 |
| O | 1.832078  | 2.638003  | -0.109802 |
| O | 0.920417  | -1.948891 | 0.326665  |
| O | 5.420772  | -0.416005 | -0.342552 |
| C | 1.328862  | -3.293332 | 0.332409  |
| H | 0.419783  | -3.890311 | 0.474978  |
| H | 1.801169  | -3.582122 | -0.621527 |
| H | 2.028468  | -3.505578 | 1.158120  |

|   |           |           |           |
|---|-----------|-----------|-----------|
| C | 2.713182  | 3.710630  | -0.333876 |
| H | 3.221181  | 3.622062  | -1.308440 |
| H | 2.101364  | 4.620753  | -0.329841 |
| H | 3.472641  | 3.784490  | 0.461951  |
| C | 5.937511  | -1.724737 | -0.314985 |
| H | 5.518552  | -2.343738 | -1.125688 |
| H | 7.021074  | -1.635307 | -0.458007 |
| H | 5.742818  | -2.218238 | 0.651729  |
| C | -3.094758 | -0.277617 | -0.479383 |
| H | -2.664951 | -1.293033 | -0.462387 |
| H | -2.720672 | 0.181169  | -1.411736 |
| C | -4.857195 | -1.006136 | -2.027880 |
| H | -5.926095 | -1.211769 | -2.197727 |
| H | -4.520948 | -0.295824 | -2.799984 |
| H | -4.304375 | -1.948183 | -2.173224 |
| C | -5.188327 | -1.459929 | 0.382282  |
| H | -4.639060 | -2.413254 | 0.324371  |
| H | -5.137372 | -1.104280 | 1.419484  |
| H | -6.246789 | -1.668402 | 0.157291  |
| C | -5.403988 | 0.869365  | -0.498167 |
| H | -5.375564 | 1.276383  | 0.523517  |
| H | -5.009627 | 1.635945  | -1.183438 |
| H | -6.463392 | 0.705210  | -0.753729 |

Vibrational frequencies

|          |          |          |
|----------|----------|----------|
| 15.2254  | 26.8410  | 35.5412  |
| 41.2142  | 73.2788  | 80.4800  |
| 97.7502  | 115.5590 | 121.4454 |
| 161.2813 | 176.2248 | 184.6875 |
| 188.2560 | 203.9636 | 210.8784 |
| 223.0732 | 236.0012 | 249.1355 |
| 259.5015 | 271.3257 | 276.6530 |
| 281.2730 | 288.5390 | 291.3939 |
| 310.5052 | 319.6743 | 321.9701 |
| 335.5635 | 349.8857 | 370.2432 |

**R1<sup>+</sup>**

|                                            |          |             |
|--------------------------------------------|----------|-------------|
| Zero-point correction=                     | 0.445923 |             |
| Thermal correction to Energy=              | 0.471020 |             |
| Thermal correction to Enthalpy=            | 0.471964 |             |
| Thermal correction to Gibbs Free Energy=   |          | 0.390074    |
| Sum of electronic and zero-point Energies= |          | -981.309883 |
| Sum of electronic and thermal Energies=    |          | -981.284786 |

Sum of electronic and thermal Enthalpies= -981.283842  
Sum of electronic and thermal Free Energies= -981.365732

Cartesian coordinates

|   |           |           |           |
|---|-----------|-----------|-----------|
| C | -2.354132 | 0.616144  | 0.716830  |
| C | -2.873467 | 0.254815  | 2.110547  |
| H | -2.786666 | -0.824546 | 2.295135  |
| H | -2.279365 | 0.783682  | 2.870992  |
| H | -3.921700 | 0.557600  | 2.232204  |
| C | -2.517652 | 2.114762  | 0.465891  |
| H | -1.923109 | 2.697147  | 1.187062  |
| H | -2.213148 | 2.399891  | -0.552015 |
| H | -3.564505 | 2.411505  | 0.593289  |
| C | -4.492169 | -0.481821 | -0.591577 |
| N | -0.972432 | 0.158234  | 0.699067  |
| C | -0.011072 | 0.894732  | 0.254086  |
| H | -0.148872 | 1.962635  | 0.032543  |
| C | 1.323802  | 0.421240  | 0.049077  |
| C | 1.705047  | -0.981581 | 0.074866  |
| C | 2.365085  | 1.402123  | -0.178478 |
| C | 3.038349  | -1.353208 | 0.029823  |
| C | 3.683473  | 1.019919  | -0.238281 |
| C | 4.018271  | -0.355257 | -0.123062 |
| H | 3.320790  | -2.401129 | 0.075079  |
| H | 4.498513  | 1.729077  | -0.366629 |
| O | 1.943129  | 2.652498  | -0.272438 |
| O | 0.714698  | -1.836848 | 0.138233  |
| O | 5.300647  | -0.610911 | -0.189516 |
| C | 0.973214  | -3.227553 | 0.225085  |
| H | -0.006774 | -3.711995 | 0.283692  |
| H | 1.507435  | -3.578066 | -0.671166 |
| H | 1.559011  | -3.459586 | 1.127095  |
| C | 2.884365  | 3.697234  | -0.437930 |
| H | 3.454318  | 3.564260  | -1.370320 |
| H | 2.304308  | 4.624402  | -0.490563 |
| H | 3.574801  | 3.739708  | 0.418386  |
| C | 5.793303  | -1.940642 | -0.084271 |
| H | 5.411784  | -2.560728 | -0.908195 |
| H | 6.882671  | -1.862473 | -0.155285 |
| H | 5.514330  | -2.380054 | 0.884202  |
| C | -2.970654 | -0.244333 | -0.429867 |
| H | -2.499226 | -1.238840 | -0.366438 |
| H | -2.594692 | 0.203871  | -1.365181 |

|   |           |           |           |
|---|-----------|-----------|-----------|
| C | -4.654138 | -1.101742 | -1.987098 |
| H | -5.708111 | -1.359728 | -2.175641 |
| H | -4.329132 | -0.403199 | -2.774158 |
| H | -4.057733 | -2.022903 | -2.083770 |
| C | -5.030723 | -1.489379 | 0.430067  |
| H | -4.431627 | -2.413755 | 0.426643  |
| H | -5.037097 | -1.094053 | 1.453795  |
| H | -6.067917 | -1.761145 | 0.177519  |
| C | -5.324533 | 0.800066  | -0.536160 |
| H | -5.338391 | 1.244204  | 0.470085  |
| H | -4.949855 | 1.557181  | -1.242305 |
| H | -6.369018 | 0.578371  | -0.807052 |

Vibrational frequencies

|          |          |          |
|----------|----------|----------|
| 10.9792  | 20.3211  | 30.6634  |
| 43.8405  | 85.8162  | 94.6771  |
| 111.0724 | 114.2794 | 138.8527 |
| 154.5496 | 163.2436 | 168.9806 |
| 179.0855 | 203.6507 | 207.6101 |
| 219.7950 | 226.2061 | 238.2160 |
| 251.6089 | 259.7133 | 270.3865 |
| 278.0369 | 280.5858 | 284.6382 |
| 309.7282 | 314.7887 | 317.6807 |
| 330.3115 | 354.9561 | 362.0155 |

**R1t**

|                                              |          |             |
|----------------------------------------------|----------|-------------|
| Zero-point correction=                       | 0.443523 |             |
| Thermal correction to Energy=                | 0.468527 |             |
| Thermal correction to Enthalpy=              | 0.469471 |             |
| Thermal correction to Gibbs Free Energy=     |          | 0.388940    |
| Sum of electronic and zero-point Energies=   |          | -981.442853 |
| Sum of electronic and thermal Energies=      |          | -981.417848 |
| Sum of electronic and thermal Enthalpies=    |          | -981.416904 |
| Sum of electronic and thermal Free Energies= |          | -981.497436 |

Cartesian coordinates

|   |           |           |          |
|---|-----------|-----------|----------|
| C | -2.447824 | 0.648167  | 0.964668 |
| C | -3.176063 | -0.322686 | 1.890629 |
| H | -2.657052 | -1.290640 | 1.928354 |
| H | -3.194477 | 0.094514  | 2.908246 |
| H | -4.212719 | -0.490071 | 1.567690 |
| C | -3.195315 | 1.994330  | 0.938831 |
| H | -3.232254 | 2.424676  | 1.950762 |

|   |           |           |           |
|---|-----------|-----------|-----------|
| H | -2.689541 | 2.709282  | 0.272722  |
| H | -4.225453 | 1.861691  | 0.585124  |
| C | -3.239371 | -0.598716 | -1.328048 |
| N | -1.176986 | 0.958921  | 1.625821  |
| C | -0.103158 | 1.462329  | 0.949292  |
| H | -0.095157 | 2.551561  | 0.814512  |
| C | 1.054579  | 0.753045  | 0.551196  |
| C | 1.234046  | -0.650349 | 0.723391  |
| C | 2.139621  | 1.460884  | -0.061614 |
| C | 2.398978  | -1.304821 | 0.316317  |
| C | 3.298015  | 0.816229  | -0.466545 |
| C | 3.430137  | -0.569527 | -0.277591 |
| H | 2.498404  | -2.377157 | 0.464316  |
| H | 4.123071  | 1.350981  | -0.934472 |
| O | 1.938068  | 2.786045  | -0.211319 |
| O | 0.199646  | -1.298507 | 1.300292  |
| O | 4.592754  | -1.111034 | -0.702814 |
| C | 0.255842  | -2.691867 | 1.459084  |
| H | -0.692027 | -2.991449 | 1.923091  |
| H | 0.358241  | -3.207486 | 0.489122  |
| H | 1.087887  | -2.994806 | 2.116848  |
| C | 2.948955  | 3.568429  | -0.793102 |
| H | 3.168289  | 3.246700  | -1.825180 |
| H | 2.576540  | 4.599946  | -0.811435 |
| H | 3.880327  | 3.532111  | -0.203173 |
| C | 4.794178  | -2.491473 | -0.544004 |
| H | 4.042567  | -3.081148 | -1.096507 |
| H | 5.788458  | -2.713909 | -0.950759 |
| H | 4.768431  | -2.789363 | 0.518304  |
| C | -2.173805 | 0.103855  | -0.455249 |
| H | -1.337606 | -0.604728 | -0.358200 |
| H | -1.775443 | 0.955609  | -1.032345 |
| C | -2.618385 | -0.708412 | -2.727906 |
| H | -3.288336 | -1.251538 | -3.413381 |
| H | -2.427316 | 0.287875  | -3.157360 |
| H | -1.658654 | -1.248775 | -2.692551 |
| C | -3.533081 | -2.023136 | -0.842222 |
| H | -2.601173 | -2.599532 | -0.725047 |
| H | -4.062378 | -2.041924 | 0.119113  |
| H | -4.164215 | -2.550901 | -1.575262 |
| C | -4.550299 | 0.180813  | -1.446217 |
| H | -5.100025 | 0.215776  | -0.493787 |
| H | -4.374702 | 1.215959  | -1.778735 |

|   |           |           |           |
|---|-----------|-----------|-----------|
| H | -5.210804 | -0.300307 | -2.185492 |
|---|-----------|-----------|-----------|

Vibrational frequencies

|          |          |          |
|----------|----------|----------|
| 24.8490  | 29.6688  | 40.0285  |
| 59.8132  | 72.8639  | 79.6045  |
| 104.9667 | 113.8645 | 132.0269 |
| 156.7247 | 173.2385 | 183.5568 |
| 190.1681 | 205.1339 | 208.5129 |
| 236.8295 | 244.5356 | 245.6313 |
| 257.6621 | 263.9257 | 277.1981 |
| 280.4923 | 282.0548 | 293.9823 |
| 310.6643 | 316.7026 | 319.6946 |
| 328.6893 | 368.5459 | 371.7101 |

**Ir01-acn**

|                                              |          |              |
|----------------------------------------------|----------|--------------|
| Zero-point correction=                       | 0.709863 |              |
| Thermal correction to Energy=                | 0.768320 |              |
| Thermal correction to Enthalpy=              | 0.769264 |              |
| Thermal correction to Gibbs Free Energy=     |          | 0.611566     |
| Sum of electronic and zero-point Energies=   |          | -3876.609630 |
| Sum of electronic and thermal Energies=      |          | -3876.551173 |
| Sum of electronic and thermal Enthalpies=    |          | -3876.550228 |
| Sum of electronic and thermal Free Energies= |          | -3876.707926 |

Cartesian coordinates

|    |           |           |           |
|----|-----------|-----------|-----------|
| Ir | 1.354165  | -0.379801 | -0.057787 |
| C  | -1.270632 | -3.826612 | -2.154973 |
| C  | -1.671244 | -3.328995 | -0.914374 |
| C  | -0.923290 | -2.318509 | -0.333882 |
| C  | 0.612315  | -2.317768 | -2.106553 |
| C  | -0.130741 | -3.316057 | -2.752470 |
| H  | -1.843299 | -4.613039 | -2.650351 |
| H  | -1.212482 | -1.884828 | 0.621548  |
| H  | 0.201874  | -3.695800 | -3.714404 |
| C  | 3.666933  | -0.182462 | -2.039623 |
| C  | 2.452500  | -0.776649 | -1.683773 |
| C  | 1.863398  | -1.727448 | -2.564532 |
| C  | 2.516409  | -2.028211 | -3.769401 |
| C  | 3.715504  | -1.438144 | -4.130906 |
| C  | 4.269082  | -0.519743 | -3.244770 |
| H  | 4.162830  | 0.548413  | -1.398857 |
| H  | 4.200737  | -1.688839 | -5.073771 |
| N  | 0.180269  | -1.831069 | -0.908725 |

|   |           |           |           |
|---|-----------|-----------|-----------|
| F | 1.988542  | -2.908092 | -4.622901 |
| F | 5.423336  | 0.054840  | -3.574651 |
| C | -2.839761 | -3.926604 | -0.184946 |
| F | -3.271169 | -3.143545 | 0.800787  |
| F | -2.500506 | -5.102493 | 0.366639  |
| F | -3.859137 | -4.170416 | -1.008407 |
| C | -2.165282 | 0.630922  | 3.256227  |
| C | -1.106017 | -0.219645 | 3.605420  |
| C | -0.082025 | -0.456141 | 2.704630  |
| C | -1.030174 | 0.968359  | 1.142338  |
| C | -2.091913 | 1.238870  | 2.003220  |
| H | -1.077490 | -0.726532 | 4.570701  |
| H | 0.738612  | -1.136769 | 2.941426  |
| C | -1.707732 | 2.983044  | -2.002357 |
| C | -1.817542 | 2.504378  | -0.697454 |
| C | -0.924594 | 1.553010  | -0.209506 |
| C | 0.223116  | 1.552277  | -2.221760 |
| C | -0.644713 | 2.481954  | -2.767486 |
| H | -2.627085 | 2.843588  | -0.059224 |
| H | 1.060127  | 1.149036  | -2.795464 |
| H | -0.483635 | 2.802242  | -3.797385 |
| N | -0.052893 | 0.107773  | 1.490939  |
| N | 0.087517  | 1.094577  | -0.971137 |
| C | 4.372777  | -1.833040 | 2.519569  |
| C | 4.213825  | -3.204462 | 2.616373  |
| C | 3.181082  | -3.781582 | 1.883735  |
| C | 2.325739  | -3.041193 | 1.078684  |
| C | 2.488665  | -1.655409 | 0.987368  |
| C | 3.538211  | -1.034237 | 1.722793  |
| H | 4.874624  | -3.801988 | 3.243791  |
| H | 1.540204  | -3.568017 | 0.534677  |
| C | 4.555734  | 2.615661  | 1.922221  |
| C | 4.589148  | 1.254519  | 2.166320  |
| C | 3.636353  | 0.410601  | 1.574444  |
| C | 2.646621  | 2.260875  | 0.525990  |
| C | 3.563680  | 3.133486  | 1.085616  |
| H | 5.299602  | 3.271440  | 2.379174  |
| H | 5.352823  | 0.831083  | 2.812692  |
| H | 1.859080  | 2.618366  | -0.136435 |
| F | 3.014623  | -5.099373 | 1.964352  |
| F | 5.362637  | -1.282124 | 3.225192  |
| N | 2.682810  | 0.944971  | 0.760412  |
| C | 3.490694  | 4.606333  | 0.805876  |



|   |           |           |           |
|---|-----------|-----------|-----------|
| F | 4.642658  | 5.061877  | 0.304440  |
| F | 3.251875  | 5.300926  | 1.922924  |
| F | 2.524699  | 4.901201  | -0.065560 |
| C | -2.705346 | 3.963382  | -2.604652 |
| C | -3.734450 | 4.431667  | -1.575379 |
| H | -3.258542 | 4.959373  | -0.734173 |
| H | -4.435089 | 5.132039  | -2.053278 |
| H | -4.317889 | 3.590016  | -1.175312 |
| C | -1.953436 | 5.182614  | -3.155408 |
| H | -2.669165 | 5.890950  | -3.599802 |
| H | -1.406938 | 5.705036  | -2.355150 |
| H | -1.231767 | 4.905574  | -3.937922 |
| C | -3.442548 | 3.237032  | -3.742033 |
| H | -2.751193 | 2.911498  | -4.533817 |
| H | -3.969312 | 2.352302  | -3.355383 |
| H | -4.181690 | 3.914059  | -4.197702 |
| H | -2.894635 | 1.884934  | 1.661344  |
| C | -3.346853 | 0.828235  | 4.196383  |
| C | -4.039742 | -0.533563 | 4.369075  |
| H | -3.366933 | -1.279878 | 4.817563  |
| H | -4.911586 | -0.425277 | 5.032710  |
| H | -4.385407 | -0.913804 | 3.397078  |
| C | -2.836358 | 1.335691  | 5.552064  |
| H | -2.324021 | 2.304072  | 5.444226  |
| H | -3.684619 | 1.472097  | 6.240024  |
| H | -2.136955 | 0.628777  | 6.022415  |
| C | -4.358973 | 1.827038  | 3.635076  |
| H | -3.911813 | 2.823247  | 3.493641  |
| H | -4.770255 | 1.487945  | 2.673835  |
| H | -5.194316 | 1.935675  | 4.342428  |
| P | -4.823845 | -0.049325 | -0.489177 |
| F | -3.207573 | -0.273558 | -0.555342 |
| F | -4.831120 | -0.589257 | 1.047980  |
| F | -4.589463 | 1.478795  | 0.065107  |
| F | -6.429301 | 0.184408  | -0.419572 |
| F | -4.801389 | 0.515612  | -2.017650 |
| F | -5.055592 | -1.557360 | -1.039681 |

Vibrational frequencies

|         |         |         |
|---------|---------|---------|
| 12.3877 | 13.4575 | 14.2068 |
| 17.6373 | 20.4135 | 25.0303 |
| 27.7894 | 30.7988 | 34.3808 |
| 34.5990 | 40.0148 | 50.8288 |

|          |          |          |
|----------|----------|----------|
| 53.8380  | 56.3172  | 59.8490  |
| 62.0740  | 65.0422  | 67.4175  |
| 69.0349  | 73.1249  | 73.6923  |
| 75.7234  | 80.3053  | 83.9970  |
| 104.7065 | 121.1275 | 133.3711 |
| 140.5619 | 142.8454 | 145.4876 |

#### Ir-12-acn

|                                              |          |              |
|----------------------------------------------|----------|--------------|
| Zero-point correction=                       | 0.706418 |              |
| Thermal correction to Energy=                | 0.765124 |              |
| Thermal correction to Enthalpy=              | 0.766068 |              |
| Thermal correction to Gibbs Free Energy=     |          | 0.606806     |
| Sum of electronic and zero-point Energies=   |          | -3876.715681 |
| Sum of electronic and thermal Energies=      |          | -3876.656974 |
| Sum of electronic and thermal Enthalpies=    |          | -3876.656030 |
| Sum of electronic and thermal Free Energies= |          | -3876.815292 |

#### Cartesian coordinates

|    |           |           |           |
|----|-----------|-----------|-----------|
| Ir | 1.442371  | -0.370887 | -0.084509 |
| C  | -1.383684 | -3.550987 | -2.321115 |
| C  | -1.725316 | -3.117564 | -1.038358 |
| C  | -0.908032 | -2.191223 | -0.412264 |
| C  | 0.575521  | -2.142318 | -2.229745 |
| C  | -0.235405 | -3.058495 | -2.917329 |
| H  | -2.010726 | -4.270626 | -2.851082 |
| H  | -1.141959 | -1.802010 | 0.577844  |
| H  | 0.048902  | -3.384291 | -3.914025 |
| C  | 3.707308  | -0.121410 | -2.135091 |
| C  | 2.480732  | -0.691015 | -1.771437 |
| C  | 1.833809  | -1.568644 | -2.690426 |
| C  | 2.439071  | -1.818797 | -3.930962 |
| C  | 3.646927  | -1.249689 | -4.297332 |
| C  | 4.259689  | -0.405068 | -3.375906 |
| H  | 4.247078  | 0.553039  | -1.467282 |
| H  | 4.093934  | -1.460011 | -5.268552 |
| N  | 0.205398  | -1.725302 | -0.986027 |
| F  | 1.855027  | -2.629703 | -4.819254 |
| F  | 5.425135  | 0.149054  | -3.711462 |
| C  | -2.910649 | -3.692424 | -0.321194 |
| F  | -3.268646 | -2.961749 | 0.731795  |
| F  | -2.637722 | -4.927796 | 0.133475  |
| F  | -3.965196 | -3.810185 | -1.129177 |
| C  | -2.073759 | 0.325275  | 3.293301  |

|   |           |           |           |
|---|-----------|-----------|-----------|
| C | -0.949594 | -0.497193 | 3.614949  |
| C | 0.070452  | -0.629448 | 2.698366  |
| C | -0.951506 | 0.850315  | 1.186113  |
| C | -2.042012 | 0.990568  | 2.088767  |
| H | -0.890805 | -1.047194 | 4.554462  |
| H | 0.923973  | -1.283351 | 2.898457  |
| C | -1.695685 | 3.042140  | -1.788256 |
| C | -1.815163 | 2.454388  | -0.549197 |
| C | -0.870013 | 1.502448  | -0.077975 |
| C | 0.317494  | 1.733394  | -2.090342 |
| C | -0.572553 | 2.661771  | -2.584423 |
| H | -2.664233 | 2.688951  | 0.087167  |
| H | 1.182937  | 1.417222  | -2.679138 |
| H | -0.405641 | 3.077263  | -3.578530 |
| N | 0.083845  | -0.005229 | 1.510749  |
| N | 0.196885  | 1.160873  | -0.883209 |
| C | 4.505875  | -1.988876 | 2.345744  |
| C | 4.343825  | -3.363245 | 2.368082  |
| C | 3.291617  | -3.893773 | 1.625829  |
| C | 2.423144  | -3.105949 | 0.884714  |
| C | 2.586352  | -1.715043 | 0.867721  |
| C | 3.657582  | -1.143014 | 1.615413  |
| H | 5.015609  | -3.998023 | 2.945221  |
| H | 1.621595  | -3.595690 | 0.328191  |
| C | 4.685828  | 2.490529  | 2.005500  |
| C | 4.723762  | 1.117463  | 2.169107  |
| C | 3.759792  | 0.307873  | 1.546423  |
| C | 2.750769  | 2.215092  | 0.623873  |
| C | 3.676672  | 3.054634  | 1.219410  |
| H | 5.437334  | 3.120109  | 2.486326  |
| H | 5.498060  | 0.657725  | 2.777134  |
| H | 1.944118  | 2.598865  | -0.001100 |
| F | 3.122880  | -5.216114 | 1.635908  |
| F | 5.516103  | -1.482773 | 3.060407  |
| N | 2.794442  | 0.887861  | 0.778568  |
| C | 3.595038  | 4.540393  | 1.032787  |
| F | 4.738524  | 5.032867  | 0.543322  |
| F | 3.371862  | 5.167167  | 2.193689  |
| F | 2.615679  | 4.887191  | 0.195861  |
| C | -2.717051 | 4.029386  | -2.342389 |
| C | -3.791428 | 4.383043  | -1.313723 |
| H | -3.354765 | 4.861939  | -0.423237 |
| H | -4.508411 | 5.091300  | -1.756766 |

|   |           |           |           |
|---|-----------|-----------|-----------|
| H | -4.347856 | 3.493406  | -0.987050 |
| C | -2.005211 | 5.319451  | -2.773329 |
| H | -2.735407 | 6.038146  | -3.178006 |
| H | -1.499043 | 5.793288  | -1.917553 |
| H | -1.251554 | 5.135504  | -3.553191 |
| C | -3.400062 | 3.381974  | -3.557912 |
| H | -2.670710 | 3.117196  | -4.338398 |
| H | -3.931772 | 2.467870  | -3.254869 |
| H | -4.130403 | 4.078428  | -4.000741 |
| H | -2.891014 | 1.592049  | 1.773589  |
| C | -3.264776 | 0.385141  | 4.242985  |
| C | -3.906991 | -1.011239 | 4.290383  |
| H | -3.191363 | -1.773844 | 4.633516  |
| H | -4.763784 | -1.015228 | 4.983561  |
| H | -4.267652 | -1.299828 | 3.291781  |
| C | -2.787065 | 0.784031  | 5.646024  |
| H | -2.316217 | 1.779612  | 5.632265  |
| H | -3.641056 | 0.820696  | 6.340863  |
| H | -2.056960 | 0.069465  | 6.053841  |
| C | -4.320021 | 1.389931  | 3.779863  |
| H | -3.906648 | 2.408965  | 3.719538  |
| H | -4.727546 | 1.122675  | 2.795211  |
| H | -5.152862 | 1.408666  | 4.499779  |
| P | -5.165758 | 0.051871  | -0.449157 |
| F | -3.583865 | -0.303042 | -0.580200 |
| F | -5.215262 | -0.664739 | 1.014140  |
| F | -4.795371 | 1.477552  | 0.271576  |
| F | -6.747227 | 0.416239  | -0.320458 |
| F | -5.120691 | 0.785420  | -1.907035 |
| F | -5.547573 | -1.356322 | -1.164267 |

Vibrational frequencies

|          |          |          |
|----------|----------|----------|
| 7.6484   | 13.0645  | 16.0974  |
| 17.4376  | 18.3123  | 24.5810  |
| 29.3942  | 31.5555  | 34.4030  |
| 35.0929  | 35.8951  | 48.5532  |
| 49.2236  | 55.3744  | 58.0191  |
| 63.9925  | 64.7983  | 67.9803  |
| 72.6777  | 74.2139  | 74.7872  |
| 77.2748  | 80.9470  | 85.6625  |
| 102.6068 | 115.2109 | 135.9466 |
| 139.4122 | 144.0133 | 147.8728 |

**Ir03-acn**

|                                              |              |              |
|----------------------------------------------|--------------|--------------|
| Zero-point correction=                       | 0.709519     |              |
| Thermal correction to Energy=                | 0.768383     |              |
| Thermal correction to Enthalpy=              | 0.769327     |              |
| Thermal correction to Gibbs Free Energy=     |              | 0.609581     |
| Sum of electronic and zero-point Energies=   |              | -3876.503268 |
| Sum of electronic and thermal Energies=      | -3876.444404 |              |
| Sum of electronic and thermal Enthalpies=    |              | -3876.443459 |
| Sum of electronic and thermal Free Energies= |              | -3876.603206 |

## Cartesian coordinates

|    |           |           |           |
|----|-----------|-----------|-----------|
| Ir | 1.406984  | -0.379010 | -0.049503 |
| C  | -0.841874 | -4.323105 | -1.659098 |
| C  | -1.422282 | -3.592075 | -0.596928 |
| C  | -0.800098 | -2.436446 | -0.165259 |
| C  | 0.917819  | -2.669355 | -1.769458 |
| C  | 0.316701  | -3.853610 | -2.239079 |
| H  | -1.303454 | -5.244442 | -2.018203 |
| H  | -1.219367 | -1.848155 | 0.650388  |
| H  | 0.776836  | -4.393169 | -3.063236 |
| C  | 3.606819  | -0.077523 | -2.089280 |
| C  | 2.502251  | -0.810213 | -1.623639 |
| C  | 2.093770  | -2.022909 | -2.287704 |
| C  | 2.876624  | -2.453600 | -3.375156 |
| C  | 3.964087  | -1.734949 | -3.833615 |
| C  | 4.313016  | -0.543668 | -3.180700 |
| H  | 3.926698  | 0.845464  | -1.604653 |
| H  | 4.537437  | -2.094360 | -4.688883 |
| N  | 0.339947  | -1.995868 | -0.708296 |
| F  | 2.575786  | -3.587294 | -4.009706 |
| F  | 5.361296  | 0.137560  | -3.637522 |
| C  | -2.658034 | -4.098148 | 0.075253  |
| F  | -3.089286 | -3.280807 | 1.034673  |
| F  | -2.438790 | -5.296341 | 0.645659  |
| F  | -3.656984 | -4.277874 | -0.795553 |
| C  | -2.085014 | 1.110428  | 3.181612  |
| C  | -1.023929 | 0.298868  | 3.608261  |
| C  | -0.044536 | -0.089271 | 2.711643  |
| C  | -1.061237 | 1.074138  | 0.986681  |
| C  | -2.065528 | 1.511800  | 1.846544  |
| H  | -0.954875 | -0.055802 | 4.637050  |
| H  | 0.782637  | -0.732012 | 3.018243  |
| C  | -1.941048 | 2.441629  | -2.441474 |

|   |           |           |           |
|---|-----------|-----------|-----------|
| C | -2.001127 | 2.187231  | -1.071504 |
| C | -1.030828 | 1.405315  | -0.449913 |
| C | 0.072516  | 1.110930  | -2.463938 |
| C | -0.861721 | 1.878378  | -3.136652 |
| H | -2.830807 | 2.566098  | -0.483117 |
| H | 0.920840  | 0.663878  | -2.985139 |
| H | -0.736224 | 2.025656  | -4.209973 |
| N | -0.070999 | 0.275475  | 1.423178  |
| N | -0.006274 | 0.881289  | -1.147092 |
| C | 4.456708  | -1.310001 | 2.669445  |
| C | 4.303988  | -2.646402 | 2.990384  |
| C | 3.238982  | -3.356435 | 2.423781  |
| C | 2.348061  | -2.762639 | 1.548647  |
| C | 2.507339  | -1.406375 | 1.223408  |
| C | 3.572400  | -0.636914 | 1.807984  |
| H | 5.003274  | -3.130989 | 3.672534  |
| H | 1.542871  | -3.363532 | 1.124540  |
| C | 4.383962  | 3.052116  | 1.561907  |
| C | 4.524814  | 1.729917  | 1.927699  |
| C | 3.615240  | 0.761717  | 1.461789  |
| C | 2.454335  | 2.432658  | 0.267010  |
| C | 3.311270  | 3.417460  | 0.717442  |
| H | 5.089776  | 3.801787  | 1.923408  |
| H | 5.335429  | 1.425207  | 2.585006  |
| H | 1.630085  | 2.672092  | -0.405532 |
| F | 3.098503  | -4.640613 | 2.743712  |
| F | 5.484670  | -0.660183 | 3.216471  |
| N | 2.602562  | 1.147590  | 0.605824  |
| C | 3.115547  | 4.843536  | 0.315175  |
| F | 4.202639  | 5.337394  | -0.292299 |
| F | 2.886515  | 5.627390  | 1.377652  |
| F | 2.085546  | 4.995922  | -0.521657 |
| C | -2.984542 | 3.277036  | -3.169941 |
| C | -4.071387 | 3.780029  | -2.219675 |
| H | -3.658467 | 4.442659  | -1.443261 |
| H | -4.813627 | 4.359304  | -2.788117 |
| H | -4.591782 | 2.946530  | -1.727353 |
| C | -2.283674 | 4.480203  | -3.818191 |
| H | -3.023284 | 5.098625  | -4.349392 |
| H | -1.793370 | 5.108843  | -3.059081 |
| H | -1.522211 | 4.169128  | -4.548854 |
| C | -3.638759 | 2.404518  | -4.252730 |
| H | -2.905162 | 2.043748  | -4.988971 |

|   |           |           |           |
|---|-----------|-----------|-----------|
| H | -4.134138 | 1.535734  | -3.797233 |
| H | -4.394060 | 2.993579  | -4.795416 |
| H | -2.866320 | 2.128169  | 1.451038  |
| C | -3.224876 | 1.465619  | 4.125789  |
| C | -3.990821 | 0.164067  | 4.419894  |
| H | -3.347586 | -0.584585 | 4.906529  |
| H | -4.835521 | 0.374348  | 5.094294  |
| H | -4.387533 | -0.269281 | 3.489714  |
| C | -2.659673 | 2.052295  | 5.425538  |
| H | -2.085457 | 2.970663  | 5.228632  |
| H | -3.485610 | 2.305957  | 6.107159  |
| H | -2.003423 | 1.343773  | 5.951691  |
| C | -4.190567 | 2.472325  | 3.499515  |
| H | -3.684776 | 3.416531  | 3.244450  |
| H | -4.662874 | 2.071860  | 2.591021  |
| H | -4.989608 | 2.705180  | 4.218499  |
| P | -4.902860 | -0.235345 | -0.319094 |
| F | -3.307573 | -0.520595 | -0.109358 |
| F | -5.191845 | -0.756572 | 1.195593  |
| F | -4.703741 | 1.290666  | 0.258247  |
| F | -6.484693 | 0.064880  | -0.526523 |
| F | -4.596320 | 0.313178  | -1.824452 |
| F | -5.098612 | -1.737310 | -0.895353 |

Vibrational frequencies

|          |          |          |
|----------|----------|----------|
| 8.5945   | 14.7567  | 16.7419  |
| 19.7037  | 21.6695  | 26.5729  |
| 27.3398  | 30.4798  | 31.0519  |
| 35.6144  | 38.0529  | 48.7097  |
| 52.0542  | 55.2299  | 57.2080  |
| 60.8721  | 61.3427  | 65.2247  |
| 67.2315  | 71.0977  | 73.8071  |
| 76.5566  | 79.2253  | 83.5200  |
| 105.1834 | 124.0959 | 127.4672 |
| 139.1470 | 142.1673 | 142.8672 |
